# Using mathematical modeling to define kinetic properties of HIV-specific CD8<sup>+</sup> T-cell responses

Yiding Yang<sup>1</sup> and Vitaly V. Ganusov<sup>1,2,3\*</sup>

<sup>1</sup>Department of Microbiology, University of Tennessee, Knoxville, TN 37996, USA,

<sup>2</sup>National Institute for Mathematical and Biological Synthesis  
University of Tennessee, Knoxville, TN 37996, USA

<sup>3</sup>Department of Mathematics, University of Tennessee, Knoxville, TN 37996, USA

\*Corresponding author: [vitaly.ganusov@gmail.com](mailto:vitaly.ganusov@gmail.com)

April 17, 2017

## Abstract

Multiple lines of evidence indicate that CD8<sup>+</sup> T cells are important in the control of HIV-1 (HIV) replication. However, CD8<sup>+</sup> T cells induced by natural infection cannot eliminate the virus or reduce viral loads to acceptably low levels in most infected individuals. Understanding the basic quantitative features of CD8<sup>+</sup> T-cell responses induced during the course of HIV infection may therefore inform us about the limits that HIV vaccines, which aim to induce protective CD8<sup>+</sup> T-cell responses, must exceed. Using previously published experimental data from a cohort of HIV-infected individuals with sampling times from acute to chronic infection we defined the quantitative properties of CD8<sup>+</sup> T-cell responses to the whole HIV proteome. In contrast with a commonly held view, we found that the relative number of HIV-specific CD8<sup>+</sup> T-cell responses (response breadth) changed little over the course of infection (first 400 days post-infection), with moderate but statistically significant changes occurring only during the first 35 symptomatic days. This challenges the idea that a change in the T-cell response breadth over time is responsible for the slow speed of viral escape from CD8<sup>+</sup> T cells in the chronic infection. The breadth of HIV-specific CD8<sup>+</sup> T-cell responses was not correlated with the average viral load for our small cohort of patients, highlighting the possibility that statistically significant correlations previously found in other small cohorts of patients arose by chance. Metrics of relative immunodominance of HIV-specific CD8<sup>+</sup> T-cell responses such as Shannon entropy or the Evenness index were also not significantly correlated with the average viral load. Our mathematical-model-driven analysis suggested extremely slow expansion kinetics for the majority of HIV-specific CD8<sup>+</sup> T-cell responses and the presence of intra- and interclonal competition between multiple CD8<sup>+</sup> T-cell responses; such competition may limit the magnitude of CD8<sup>+</sup> T-cell responses, specific to different epitopes, and the overall number of T-cell responses induced by vaccination. Together, our results suggest that vaccines inducing T-cell responses with breadth and expansion kinetics similar to those induced by natural HIV infection are unlikely to be highly efficacious, and we propose minimum quantitative features of CD8<sup>+</sup> T-cell responses (breadth, expansion kinetics) that vaccines must induce to be deemed acceptable for further testing.

**Keywords:** acute HIV infection, vaccines, CD8<sup>+</sup> T cells, immune response, multiple epitopes, competition, mathematical model.

**Abbreviations:** CTL, cytotoxic T lymphocyte; HIV, human immunodeficiency virus, *SE*, Shannon entropy, *EI*, Evenness index, PBMC, peripheral blood mononuclear cells, SFC, spot-forming cells, IFN, interferon.

**Short running title:** T-cell response kinetics in HIV

## 34 1 Introduction

35 HIV-1 (HIV) remains a major global infectious disease with more than 35 million infected in-  
36 dividuals, and millions of deaths due to AIDS every year [1, 2]. Despite decades of research, a  
37 highly effective vaccine against HIV/AIDS is not yet available; several vaccine candidates failed  
38 in large phase II or III clinical trials [3–5]. One set of such failed trials investigated the efficacy  
39 of a CD8<sup>+</sup> T-cell-based vaccine against HIV that had shown reasonable protection following the  
40 infection of immunized monkeys with SIV [6, 7]. Although it is likely that multiple factors con-  
41 tributed to the failure of this vaccine in humans, the limited breadth and small magnitude of the  
42 vaccine-induced T-cell response might have been important [8, 9]. However, the magnitude and  
43 breadth of HIV-specific CD8<sup>+</sup> T-cell response needed for a protective vaccine are not well defined  
44 [9, 10]. Although most recent vaccine developments have shifted toward the induction of broadly  
45 neutralizing antibodies [11–14], it is likely that the induction of both neutralizing antibodies and  
46 memory CD8<sup>+</sup> T cells will be needed for adequate control of HIV [10, 15].

47 Multiple lines of evidence suggest that CD8<sup>+</sup> T cells play an important role in the control  
48 of HIV replication; some evidence is based on correlational studies in humans and some on ex-  
49 periments with SIV-infected monkeys [16–18]. In particular, 1) the appearance of CD8<sup>+</sup> T-cell  
50 responses in the blood is correlated with a decline in viremia [16, 19–22]; 2) the rate of disease pro-  
51 gression of HIV-infected individuals is strongly dependent on MHC-I locus combinations [23–25];  
52 3) HIV escapes recognition from multiple CD8<sup>+</sup> T-cell responses during the infection [16, 26]. No  
53 consensus has been reached on the relationship between magnitude of HIV-specific CD8<sup>+</sup> T-cell  
54 responses and viral load [27–32]; several studies, but not all, have indicated a statistically signifi-  
55 cant negative correlation between viral load and the number of Gag-specific CD8<sup>+</sup> T-cell responses  
56 [32–36]. Important data also came from experiments on SIV-infected monkeys; depletion of CD8<sup>+</sup>  
57 T cells prior to or after infection leads to significantly higher viral loads [37–40]. Some vaccination  
58 protocols in monkeys, in which high levels of SIV-specific CD8<sup>+</sup> T cells were induced, resulted in  
59 a reduced viral load and, under certain conditions, apparent elimination of the virus [6, 7, 41–44].

60 Despite these promising experimental observations, following natural infection, CD8<sup>+</sup> T-cell  
61 responses have not cleared HIV in any patient, or reduced viral loads to acceptably low levels  
62 in many individuals [16, 45, 46]. While some HIV-infected individuals do not appear to progress  
63 to AIDS and maintain high CD4<sup>+</sup> T-cell counts in their peripheral blood (so-called long-term  
64 non-progressors or elite controllers, [46–48]), whether CD8<sup>+</sup> T cells are solely responsible for such  
65 control remains undetermined [46, 49–53]. It is clear that if we are to pursue the development of  
66 CD8<sup>+</sup> T-cell-based vaccines against HIV, such vaccines must induce more effective CD8<sup>+</sup> T-cell  
67 responses than those induced during natural HIV infection. However, the definition of a “more  
68 effective” response is not entirely clear. If induction of a broad (i.e., specific to multiple epitopes)  
69 and high magnitude CD8<sup>+</sup> T-cell response is not feasible, it remains to be determined whether  
70 vaccination strategies should focus on the induction of broad and low magnitude or narrow and  
71 high magnitude CD8<sup>+</sup> T-cell responses. The basic quantitative aspects of HIV-specific CD8<sup>+</sup> T-  
72 cell responses induced during natural infection may indicate which parameters of vaccine-induced  
73 responses should be targeted for improvement so that the vaccine provides reasonable protection  
74 in humans.

75 There are several studies documenting the kinetics of HIV-specific CD8<sup>+</sup> T-cell responses in  
76 humans from acute to chronic infection [54–59]. In some cases, the data are restricted to a few well-  
77 defined epitopes, often inducing immunodominant responses [59–61]. Similarly, only the kinetics  
78 of immunodominant CD8<sup>+</sup> T cell responses to SIV in monkeys following vaccination have been  
79 analyzed and well quantified [62, 63]. Many theoretical studies developed mathematical models of

80 within-host HIV dynamics and their control by T-cell responses [64–69], but these models have not  
81 been well parametrized due to a lack of appropriate experimental data. Furthermore, these models  
82 involved different *a priori* assumptions on how CD8<sup>+</sup> T-cell responses to HIV are generated and  
83 maintained; the dynamics of these responses are often responsible for the observed changes in  
84 viral load and kinetics of viral escape from T cells [64, 68, 70]. Further refinements of such models  
85 and investigations of the robustness of their predictions will benefit greatly from the systematic  
86 analysis of the kinetics of HIV-specific CD8<sup>+</sup> T-cell responses. In particular, it remains unclear  
87 whether CD8<sup>+</sup> T-cell responses specific to different epitopes of HIV compete during infection as  
88 many mathematical models assume [64, 69, 71]. Studies on the competition between CD8<sup>+</sup> T  
89 cells specific to the same or different epitopes in mice are inconclusive, with some documenting  
90 competition and others a lack of competition [72–82]. A recent study using cross-sectional data  
91 suggested an absence of competition between CD8<sup>+</sup> T-cell responses, specific to different HIV  
92 epitopes [83]. The absence of such interclonal competition would also predict that it is possible  
93 for a vaccine to generate a very broad HIV-specific CD8<sup>+</sup> T-cell response.

94 In the present study, we performed mathematical-model-driven analysis of experimental data  
95 on viral load and HIV-specific CD8<sup>+</sup> T-cell dynamics from a study of 22 patients who had been  
96 followed from acute to chronic infection [55]. The useful features of these data include the high  
97 temporal resolution of CD8<sup>+</sup> T-cell responses and viral load measurement, with the detection  
98 of many viral epitopes recognized by CD8<sup>+</sup> T cells using the ELISPOT assay. In contrast with  
99 several previous studies (e.g., [60, 61, 83]), which focused on a subset of well-defined epitopes and  
100 epitope-specific CD8<sup>+</sup> T cells, we followed CD8<sup>+</sup> T cell responses to the whole viral proteome,  
101 which enabled detailed quantitative investigation of CD8<sup>+</sup> T-cell responses to HIV.

## 102 2 Material and methods

### 103 2.1 Experimental data

104 The data collection methods were as described in detail previously [55]. Briefly, individuals with  
105 acute HIV subtype B infection were recruited into the study, blood samples from the patients were  
106 taken at multiple, sequential time points over several months following symptomatic presentation.  
107 All measurements were timed in days since onset of symptoms. The time interval between infection  
108 and onset of symptoms is likely to vary somewhat between individuals [84]. Viral load was recorded  
109 for all patients. Protein regions targeted by patients’ HIV-specific T-cell responses were mapped  
110 using either autologous or consensus HIV-1B viral sequences obtained within the first 6 months  
111 of infection by peptide-stimulated interferon (IFN $\gamma$  ELISPOT assay or tetramer immunolabeling.  
112 Both assays show similar patterns of responses kinetics [55], but in our analyses we only used data  
113 obtained by ELISPOT. Note that in patients WEAU, SUMA, and BORI, T-cell responses were  
114 not mapped to the whole proteome; in these patients, responses measured in a previous study [85]  
115 were followed over time. In total, there were data for 22 patients (two additional patients only  
116 had tetramer immunolabeling measurements and were therefore not included in the analysis).  
117 Experimental data on the dynamics of HIV-specific CD8<sup>+</sup> T-cell responses and viral loads are  
118 shown in Figs. S1–S4.

## 119 2.2 Mathematical model of CD8<sup>+</sup> T-cell response to a viral infection

120 To quantify the kinetics of HIV-specific CD8<sup>+</sup> T-cell responses, we used a simple  $T_{\text{on}}/T_{\text{off}}$  math-  
 121 ematical model [86, Fig. 1]. The model assumes that the response starts at time  $t = 0$  with  
 122 frequency  $E_0$  of epitope-specific CD8<sup>+</sup> T cells that become activated at time  $T_{\text{on}}$ . Activated T  
 123 cells start proliferating at rate  $\rho$  and reach the peak at time  $T_{\text{off}}$ . Thereafter, epitope-specific  
 124 CD8<sup>+</sup> T cells decline at rate  $\alpha$ . The dynamics of the CD8<sup>+</sup> T-cell response  $E(t)$  are therefore  
 125 represented by the following differential equation:

$$\frac{dE}{dt} = \begin{cases} 0, & \text{if } t < T_{\text{on}}, \\ \rho E, & \text{if } T_{\text{on}} \leq t \leq T_{\text{off}}, \\ -\alpha E, & \text{if } t > T_{\text{off}} \end{cases} \quad (1)$$

126 with  $E(0) = E_0$  as the predicted initial frequency of epitope-specific CD8<sup>+</sup> T cells at time  $t = 0$   
 127 days since symptom onset.

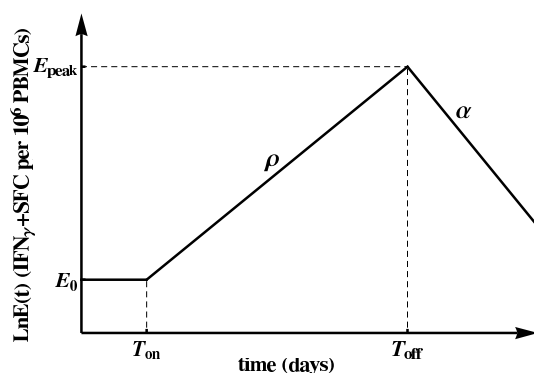

**Figure 1:** Schematic representation of the  $T_{\text{on}}/T_{\text{off}}$  mathematical model fitted to the epitope-specific CD8<sup>+</sup> T-cell response kinetics data [86]. In this model,  $E_0$  epitope-specific naive CD8<sup>+</sup> T cells become activated at time  $t = T_{\text{on}}$  and start proliferating at rate  $\rho$ . At  $t = T_{\text{off}}$ , T cell response peaks and declines at rate  $\alpha$ . We refer to  $E_0$  as the predicted initial frequency of epitope-specific CD8<sup>+</sup> T cells [87]. Evidently,  $E_0$  may over- or under-estimate the response precursor frequency depending on exactly when the T cells became activated and how adequate the mathematical model is for describing immune response data during the expansion phase.

128 Most immune responses (about 80%) had a detectable frequency at the first time point at which  
 129 the response was measured, so we could not estimate when the response became activated ( $T_{\text{on}}$ ).  
 130 Therefore, when fitting the mathematical model (eqn. (1)) to such data, we set  $T_{\text{on}} = 0$ . This  
 131 implies that we assumed each epitope-specific CD8<sup>+</sup> T cell response is triggered at  $t = 0$  (onset  
 132 of symptoms) with  $E_0$  activated cells; this is clearly a simplification. In this way, the predicted  
 133 initial frequency  $E_0$  is a generalized recruitment parameter, which combines the true precursor  
 134 frequency and the recruitment rate/time [86, 88]. For a minority of responses (about 20%) there  
 135 were one or several consecutive measurements in the first few days since symptom onset that did  
 136 not result in detectable T-cell responses. In those cases, we set  $T_{\text{on}}$  as the first day with detectable  
 137 measurements or the last consecutive day with non-detectable measurements. We fitted the model  
 138 (eqn. (1)) to the data on each measured epitope-specific CD8<sup>+</sup> T-cell response in all patients using  
 139 **Mathematica 8** with nonlinear least squares by log-transforming the model predictions and data.  
 140 For those responses that only expanded or only declined, we estimated only the expansion rate  $\rho$   
 141 or contraction rate  $\alpha$ , respectively.

## 142 2.3 Statistics

143 Depending on the specific analysis, we used either parametric (e.g., Pearson correlation or linear  
144 regression) or nonparametric (Spearman’s rank correlation) methods. In most cases, significance  
145 was not strongly dependent on the method used and in cases when normality of the data was  
146 violated we used nonparametric tests. We used three metrics to estimate the strength of HIV-  
147 specific, Gag-specific, or Env-specific CD8<sup>+</sup> T-cell response. Our focus on Gag and Env stems  
148 from previous observations on the relative importance of T-cell responses specific to these proteins  
149 in viral control [33, 34].

150 The first metric was immune response breadth, which is the number of responses specific to  
151 either all HIV proteins, Gag, or Env at time  $t$ ,  $n(t)$ . For this metric, we took into account all time  
152 points at which CD8<sup>+</sup> T-cell responses were measured for each patient. In some patients, there  
153 were missing measurements for some T-cell responses (marked “nd” for “not done”), so we tried  
154 two methods: i) substituting “nd” with 1 (detection level), or ii) removing that time point from the  
155 analysis. To estimate the breadth of the immune response it was important to exclude the data for  
156 that specific time point from the analysis; inclusion of such data might lead to an overestimation  
157 of the immune response breadth. There were subtle differences in estimated breadth using these  
158 two methods, but these did not substantially influence our conclusions. A second metric for the  
159 strength of the immune response was Shannon entropy ( $SE$ ). While breadth only accounts for the  
160 number of responses,  $SE$  takes into account the relative abundance of individual responses, and  
161 reaches its maximum when all responses are of identical magnitude.  $SE$  at time  $t$  was calculated  
162 as  $SE(t) = \sum_{i=1}^{n(t)} f_i(t) \log_2(f_i(t))$  where  $n(t)$  is the number of HIV-, Gag-, or Env-specific T-cell  
163 responses at time  $t$ , and  $f_i(t)$  is the frequency of the epitope-specific T-cell response in the total  
164 response at time  $t$ . Importantly, measurements of  $SE$  do not depend on “nd” or below-level-of-  
165 detection values; however, the number of detected responses  $n(t)$  may have a large impact on  
166 the actual value of  $SE$ . A third metric, Evenness index ( $EI$ ) was calculated as the normalized  
167  $SE$ :  $EI(t) = SE(t)/\log_2(n(t))$  where  $\log_2(n(t))$  is the maximum value  $SE$  can reach for  $n(t)$   
168 immune responses.  $EI$  measures the degree of vertical immunodominance of HIV-specific T cell  
169 responses [56] and varies between 0 and 1. Larger values indicate more “even” responses which,  
170 based on our and others’ previous work, should predict a longer time to viral escape from CD8<sup>+</sup>  
171 T cell responses and therefore better virus control [56, 89]. Both  $SE$  and  $EI$  are undefined for  
172  $n = 0$ . Furthermore,  $EI$  is ill-defined when only one immune response is measured per time point;  
173 this is relevant when looking at Gag- and Env-specific T-cell responses as some patients had few  
174 or none of those. We performed alternative analyses by i) removing data points where  $n = 1$ ,  
175 or ii) assigning  $EI = 1$  or  $EI = 0$  when  $n = 1$ . These modifications did not influence most of  
176 our conclusions involving this metric. Because both viral load and breadth of T cell responses  
177 changed within patients, in one set of analyses we calculated the mean breadth per time interval  
178 by averaging several measurements of breadth.

179 In addition to  $SE$  and  $EI$ , other measures of immunodominance could also be used. For  
180 example, Simpson’s diversity index is used in ecology to estimate species richness [90]. In our  
181 analyses, Simpson’s diversity index led to predictions similar to  $SE$  (results not shown), so we  
182 have reported only the results for  $SE$  and  $EI$  here.

183 As some of our correlations turned out to be statistically nonsignificant we performed several  
184 power analyses to determine the numbers of patients needed to detect significance. We reanalyzed  
185 previously published data from Geldmacher *et al.* [34] to determine whether the small sample  
186 size in our cohort was responsible for the nonsignificant correlations. We performed these power  
187 analyses using a bootstrap approach by resampling from the data with replacement using  $10^3 - 10^4$

188 simulations.

## 189 **2.4 Ethics statement**

190 This paper uses experimental data obtained previously [55] and no new observations requiring  
191 patient consent or institutional review board approval have been performed.

## 192 **3 Results**

### 193 **3.1 Moderate changes in the breadth of HIV-specific CD8<sup>+</sup> T-cell re-** 194 **sponse over the course of infection**

195 While CD8<sup>+</sup> T-cell responses are thought to play an important role in control of HIV replication,  
196 the kinetics of CD8<sup>+</sup> T-cell responses specific to most HIV proteins, especially during the acute  
197 phase of infection, have not been quantified. Here, we reanalyzed data from a previous study that  
198 included patients infected with HIV-1 subtype B [55].

199 First, we investigated how many responses there were in a given patient and how the breadth  
200 of the HIV-specific CD8<sup>+</sup> T-cell response changed over the course of infection. For every patient,  
201 we counted the maximum number of responses detected by ELISPOT assay to the whole viral  
202 proteome and their specificity (Fig. 2). Similarly to several previous studies [16, 54, 56], we found  
203 that most T-cell responses were directed against Gag and Env and this distribution changed little  
204 after 100 days since symptom onset (Fig. 2A and results not shown). Interestingly, responses to  
205 Nef, Integrase, or Reverse Transcriptase constituted a substantial fraction of all responses. We  
206 found a median of eight epitope-specific CD8<sup>+</sup> T-cell responses per patient, with two patients  
207 having over 15 responses and three patients having only three responses. Because of the potential  
208 limit of detection associated with ELISPOT assays, the true breadth of HIV-specific CD8<sup>+</sup> T cell  
209 response may be even higher [59]. The distribution of the number of responses in a given patient  
210 did not change significantly over the course of infection, except in patients with many responses in  
211 which some T-cell responses disappeared in chronic infection (Fig. 2B and Fig. S5 in Supplement).  
212 There was no change in the average total HIV-specific T-cell response over time in this cohort of  
213 patients (Fig. S6).

214 The breadth of the CD8<sup>+</sup> T-cell response, measured as the number of HIV-specific CD8<sup>+</sup> T-  
215 cell responses (or breadth of protein-specific (such as Gag-specific) CD8<sup>+</sup> T-cell responses) has  
216 been implicated in protection against disease progression [33, 34, 36, 91]. Some, but not all,  
217 previous analyses suggested an increase in the breadth of HIV-specific CD8<sup>+</sup> T cell responses over  
218 time [54, 55, 92, 93]. We found variable patterns for the change in breadth over time, i.e., there  
219 were patients with increasing breadth (e.g., patients MM45, MM48, MM49), decreasing breadth  
220 (e.g., MM43, MM55), or with non-monotonically changing breadth (e.g., MM23, MM42; Fig. S5).  
221 Because there was no significant change in the average number of T-cell responses in all patients  
222 (Fig. S5), we calculated the dynamics of normalized breadth for individual patients, dividing the  
223 number of HIV-specific T-cell responses detected at a particular time point in a given patient by  
224 the total number of responses in that patient (Fig. 3). Our analysis suggested that there was a  
225 moderate but statistically significant increase in the average normalized breadth over time (from  
226 85% to 95%), and this increase was limited to the first 35 days after symptom onset (results not  
227 shown).

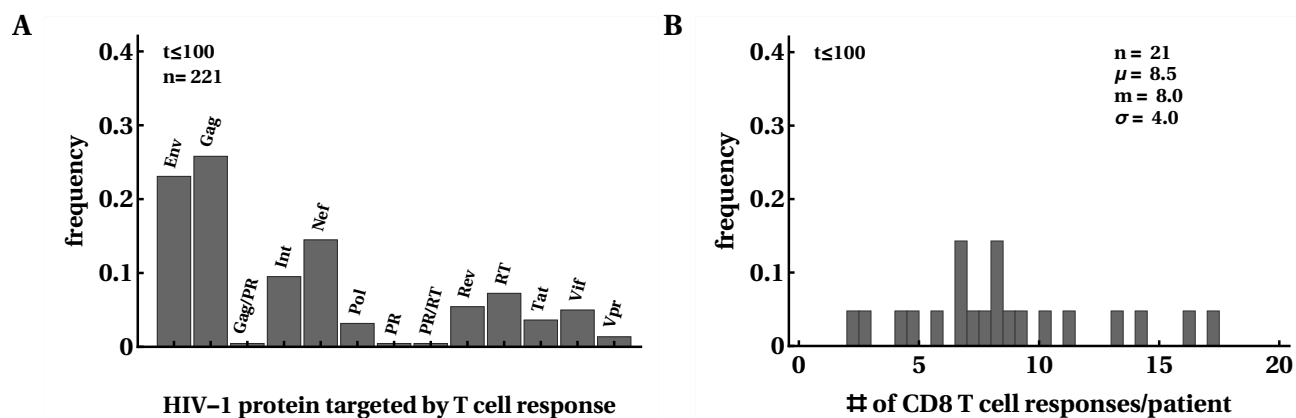

**Figure 2:** Most HIV proteins were recognized by CD8<sup>+</sup> T cell responses. We calculated the frequency at which HIV proteins were recognized by CD8<sup>+</sup> T cells; overall, 50% of responses were directed against Env or Gag (A).  $m = 8$  CD8<sup>+</sup> T cell responses were detected in this cohort of 22 patients at any given time point after infection (B). In B (and other figures in the paper),  $\mu$  denotes the average,  $m$  is the median, and  $\sigma$  is the standard deviation. The distributions are shown for the first 100 days after symptom onset but, overall, distributions changed little over the course of 400 days of infection (results not shown). Patient SUMA0874 was excluded from the analysis in B due to a lack of measurements of all T cell responses at all time points.

228 A relatively high breadth in the first month after infection, averaged over many patients ( $\sim$   
 229 85% of the maximum), may arise from the mixture of patients in the early and late stages of  
 230 acute infection; it may be expected that patients with early acute infection have few CD8 T-cell  
 231 responses, whereas patients with late acute infection have many CD8 T-cell responses. To address  
 232 this caveat we analyzed the dynamics of relative breadth in a subset of patients with a declining  
 233 viral load, which may be an indication of early acute HIV infection (patients MM25, MM28,  
 234 MM39, MM40, MM23, MM33, MM45, MM49, MM55, MM56). We found that similarly to the  
 235 previous analysis, there was a statistically significant increase in the average (or median) relative  
 236 breadth over time ( $\rho = 0.36$ ,  $p = 0.004$ ), and this increase was limited to the first 12 days after  
 237 symptom onset. The average normalized breadth increased from 73% to 96% between 12 and 400  
 238 days after symptom onset. Together, our results suggest a moderate increase in T-cell response  
 239 breadth by the first few weeks after symptom onset; however, there is a possibility that an increase  
 240 in breadth may be larger for patients progressing from very early acute to chronic infection. In  
 241 a recent paper [58] a moderate increase in CD8<sup>+</sup> T-cell response breadth within the first several  
 242 weeks of symptom onset and then relatively stable maintenance of breadth was observed in one  
 243 of two patients; the second patient showed a large increase in CD8<sup>+</sup> T-cell response breadth over  
 244 time.

245 Although the immune response breadth is considered to be a good measure of effective immune  
 246 response [10], there is no reason for this conjecture other than to simplify calculation. In fact, it is  
 247 possible that many HIV-specific T-cell responses with small magnitudes do not contribute to viral  
 248 control but would be counted when calculating immune response breadth. Studies in mice indicate  
 249 that the efficacy of effector and memory CD8<sup>+</sup> T cells in killing peptide-pulsed targets in the spleen  
 250 is directly proportional to the T cell frequency [94], meaning responses with a low frequency would  
 251 contribute little to the killing of targets. Other studies have suggested that equal magnitudes of  
 252 T-cell responses may be beneficial by limiting viral escape [56, 71]. Therefore, we introduced  
 253 two additional measures of HIV-specific T-cell response efficacy, allowing us to quantify T cell



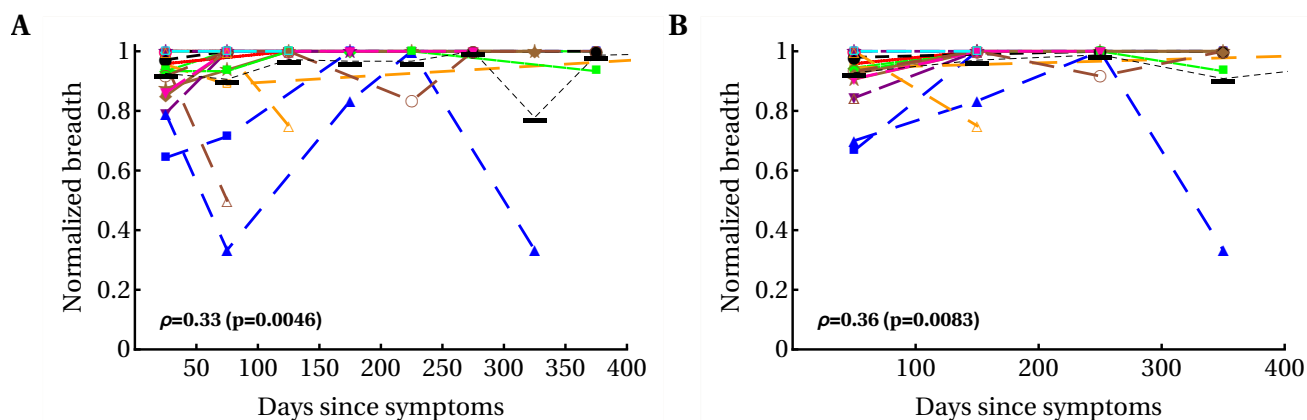

**Figure 3:** Modest yet statistically significant increase in the average normalized T-cell response breadth over the course of the first year of HIV infection. We divided the observations into different time bins (A, 50-day intervals; B, 100-day intervals) and calculated the relative breadth for the corresponding interval. The relative breadth was calculated as the number of HIV-specific CD8<sup>+</sup> T-cell responses detected in a given time period divided by the number of all responses measured for that patient in all time periods; data were averaged to simplify presentation. Averaging did not influence the statistical significance of conclusions (not shown). Colors and symbols represent the data from different patients as shown in Fig. S5 in Supplementary Material. Black horizontal bars denote the mean relative breadth for that time interval for all patients. There was a statistically significant increase in relative breadth (Spearman's rank correlation coefficient  $\rho$  and  $p$  values indicated on panels). There was no change in the average total immune response in all patients (Fig. S6). Detailed analysis of the relative number of CD8<sup>+</sup> T-cell responses in individual patients revealed variable patterns: constant breadth, increasing breadth, decreasing breadth, and breadth changing non-monotonically over time (Fig. S7). Also, no overall change in the average breadth (un-normalized) was observed (Fig. S5). We observed a similarly modest but significant increase in  $SE$  and  $EI$  of HIV-specific CD8<sup>+</sup> T-cell response with time (Fig. S8).

254 immunodominance (or richness): Shannon entropy ( $SE$ ) and Evenness index ( $EI$ , see Materials  
255 and Methods for details). While  $SE$  has been used to measure HIV genome variability in sequence  
256 alignments, it has not previously been used to estimate immunodominance of immune responses.  
257 Our analysis suggested that both  $SE$  and  $EI$  increased over the course of infection and that  
258 this change was more significant for  $EI$ , in part because  $EI$  cannot exceed 1 by definition (Figs.  
259 S8–S10). However, the statistically significant increases in these two metrics were also mainly  
260 restricted to the first 40 days since symptom onset (not shown). Thus, the number and magnitude  
261 of evenness for HIV-specific CD8<sup>+</sup> T cell responses both appear to increase very early in infection  
262 and stabilize within 40 days of symptom onset.

### 263 3.2 Variable correlations between immune response breadth and viral 264 load

265 Correlates of protection against disease progression of HIV-infected individuals are incompletely  
266 understood. It is well known that viral load is strongly correlated with risk of disease progression  
267 in HIV-infected patients [95] and many other parameters have been measured to reveal potential  
268 markers of protection. Among these, the breadth of HIV-specific CD8<sup>+</sup> T-cell response has been  
269 widely emphasized as a potential predictor of viral control. Several studies found a statistically  
270 significant negative correlation between the number of Gag-specific CD8<sup>+</sup> T-cell responses and

271 viral load [33, 34, 36, 91, 96] whereas others did not [32]. In some of these studies, statistically  
 272 significant negative correlations were based on relatively small numbers of patients, e.g.,  $n = 18$   
 273 in Radebe *et al.* [91]. A negative correlation between viral load and breadth of Gag-specific CD8<sup>+</sup>  
 274 T-cell responses was also found using bioinformatic predictions of potential T cell epitopes [35].  
 275 Negative correlations between viral load and CD8<sup>+</sup> T-cell response breadth have generally been  
 276 interpreted as an indication of protection even though it has been shown that viral load has an  
 277 impact on the change in the number of Gag-specific T-cell responses over time [97].

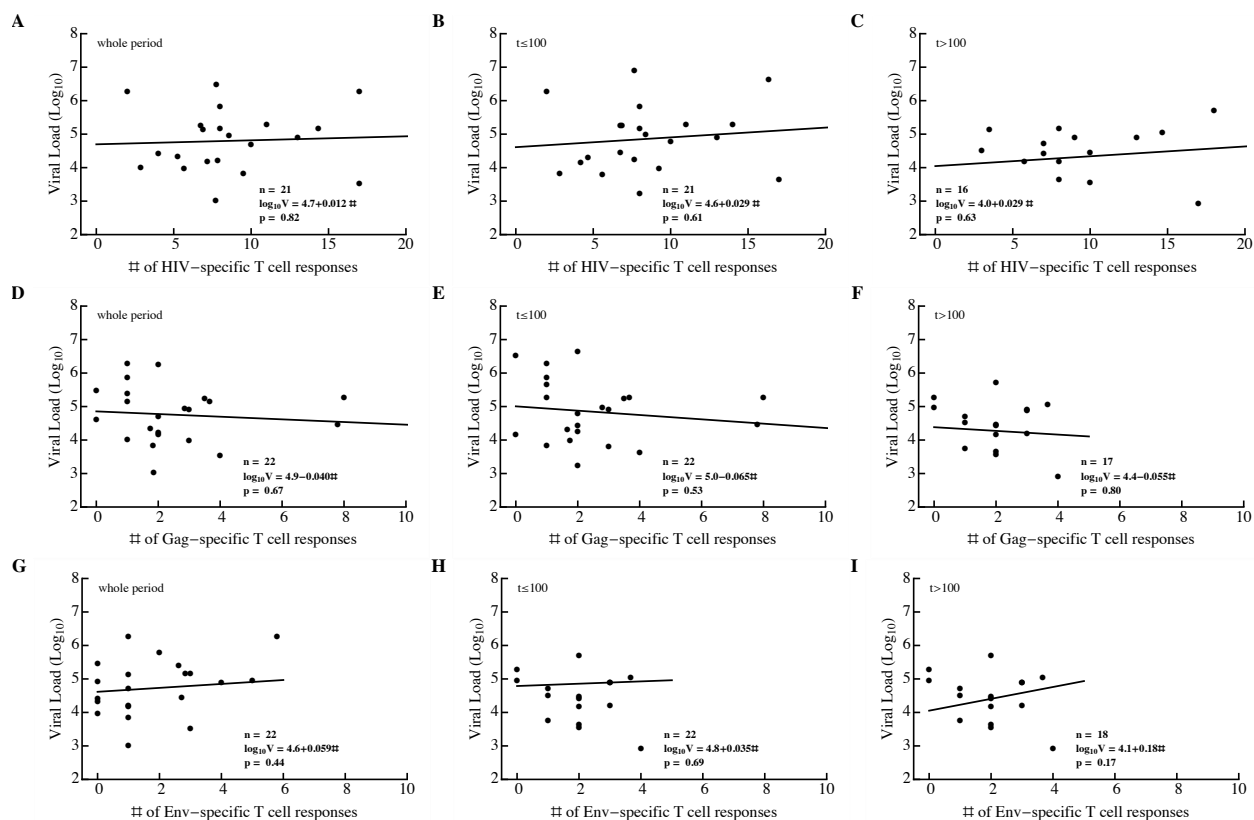

**Figure 4:** Breadth of HIV-specific CD8<sup>+</sup> T-cell response in a patient does not correlate significantly with average viral load. We calculated the average number of HIV-specific (A–C), Gag-specific (D–F), and Env-specific (G–I) CD8<sup>+</sup> T-cell responses over the whole observation period (A, D, G), during acute infection ( $t \leq 100$  days since symptom onset; B, E, H), or during chronic infection ( $t > 100$  days since symptom onset; C, F, I) and  $\log_{10}$  average viral load in that time period. The average viral load during infection was not dependent on the breadth of the Gag-specific CD8<sup>+</sup> T-cell response during the infection (D–F). Patient SUMA0874 was excluded from the analysis in A–C due to insufficient measurements of all T-cell responses at all time points.

278 We investigated the relationship between three different metrics of T-cell response efficacy:  
 279 breadth, *SE*, and *EI* (see Material and Methods). For that, we calculated the average viral load  
 280 and average metric for the whole observation period in a patient, during the acute ( $t \leq 100$   
 281 days since symptoms) or chronic ( $t > 100$  days) phase of infection. None of the correlations between  
 282 metric and viral load were significant, independent of the time period of infection or protein  
 283 specificity (Figs. 4 and S11).

284 We also investigated whether changes in the immune response breadth over time were nega-  
 285 tively correlated with viral load. Because there was a statistically significant increase in breadth  
 286 within the first month of symptom onset, a negative correlation between the change in breadth

287 and viral load may indicate that a larger breadth is associated with viral control. However, both  
288 negative and positive correlations were found in similar proportions, indicating that a greater  
289 breadth did not necessarily drive reduction in viral load (or vice versa). To determine if individual  
290 epitope-specific CD8<sup>+</sup> T cells contribute to viral control, we calculated Spearman's rank correla-  
291 tion coefficients between the magnitude of epitope-specific T-cell response and viral load for all  
292 T-cell responses over time (Fig. 5). We found that there were disproportionately more negative  
293 than positive correlations, which suggested that increasing T-cell responses drive the decline in  
294 viral load (Fig. 5A). By dividing the data into correlations during the immune response expansion  
295 ( $t \leq t_{\text{peak}}$ , Fig. 5B) and contraction phases ( $t > t_{\text{peak}}$ , Fig. 5C) we found that most negative  
296 correlations are observed when T-cell responses expand (and the viral load declines). These anal-  
297 yses are consistent with the idea that expansion of HIV-specific CD8<sup>+</sup> T-cell responses is strongly  
298 associated with viral decline and that the contribution of T cells to viral control could be lower  
299 during chronic infection.

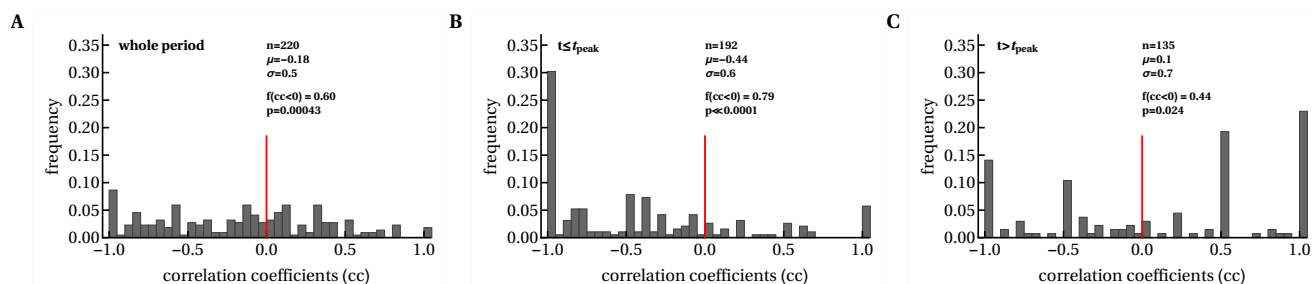

**Figure 5:** Expanding CD8<sup>+</sup> T-cell responses were negatively correlated with viral load before T cell numbers reached their peak values. We calculated Spearman's correlation coefficients between longitudinal changes in viral load and epitope-specific CD8<sup>+</sup> T-cell responses in each patient during the whole period (A), and before (B) and after (C) the peak of CD8<sup>+</sup> T-cell response. The  $f(cc < 0)$  value denotes the fraction of negative correlation coefficients ( $cc$ ), and  $p$  values are indicated for the binomial test of equal distribution of positive and negative correlations.

### 300 3.3 Most HIV-specific CD8<sup>+</sup> T-cell responses expand slowly and peak 301 early

302 Several recent studies have quantified HIV dynamics during acute infection in patients either by  
303 using data from blood banks or by frequent sampling of individuals at high risk of HIV infection  
304 [84, 98]. However, as far as we know there are no accurate estimates of parameters characterizing  
305 the kinetics of HIV-specific CD8<sup>+</sup> T-cell response in acute infection. Therefore, we used a simple  
306 mathematical model (see eqn. (1) in Material and Methods) to characterize the kinetics of epitope-  
307 specific CD8<sup>+</sup> T-cell responses during acute HIV infection (Fig. S13). Since our mathematical  
308 model (eqn. (1)) describes T-cell responses specific to different viral epitopes in uncoupled form,  
309 all model parameters could be estimated for each T-cell response independently (Fig. 6).

310 The dynamics of HIV-specific CD8<sup>+</sup> T-cell responses were variable in individual patients. To  
311 further our analysis, we divided all HIV-specific T-cell responses into two subsets. In the first, a  
312 larger subset (about 80%) of T-cell responses were predicted to either expand or contract from  
313 the onset of symptoms (“early” responses, see Figs. 1 and 6). In a smaller subset, CD8<sup>+</sup> T-cell  
314 responses had a delay  $T_{\text{on}}$  in the expansion kinetics (“delayed” or “late” responses, see Figs. 1 and  
315 6).

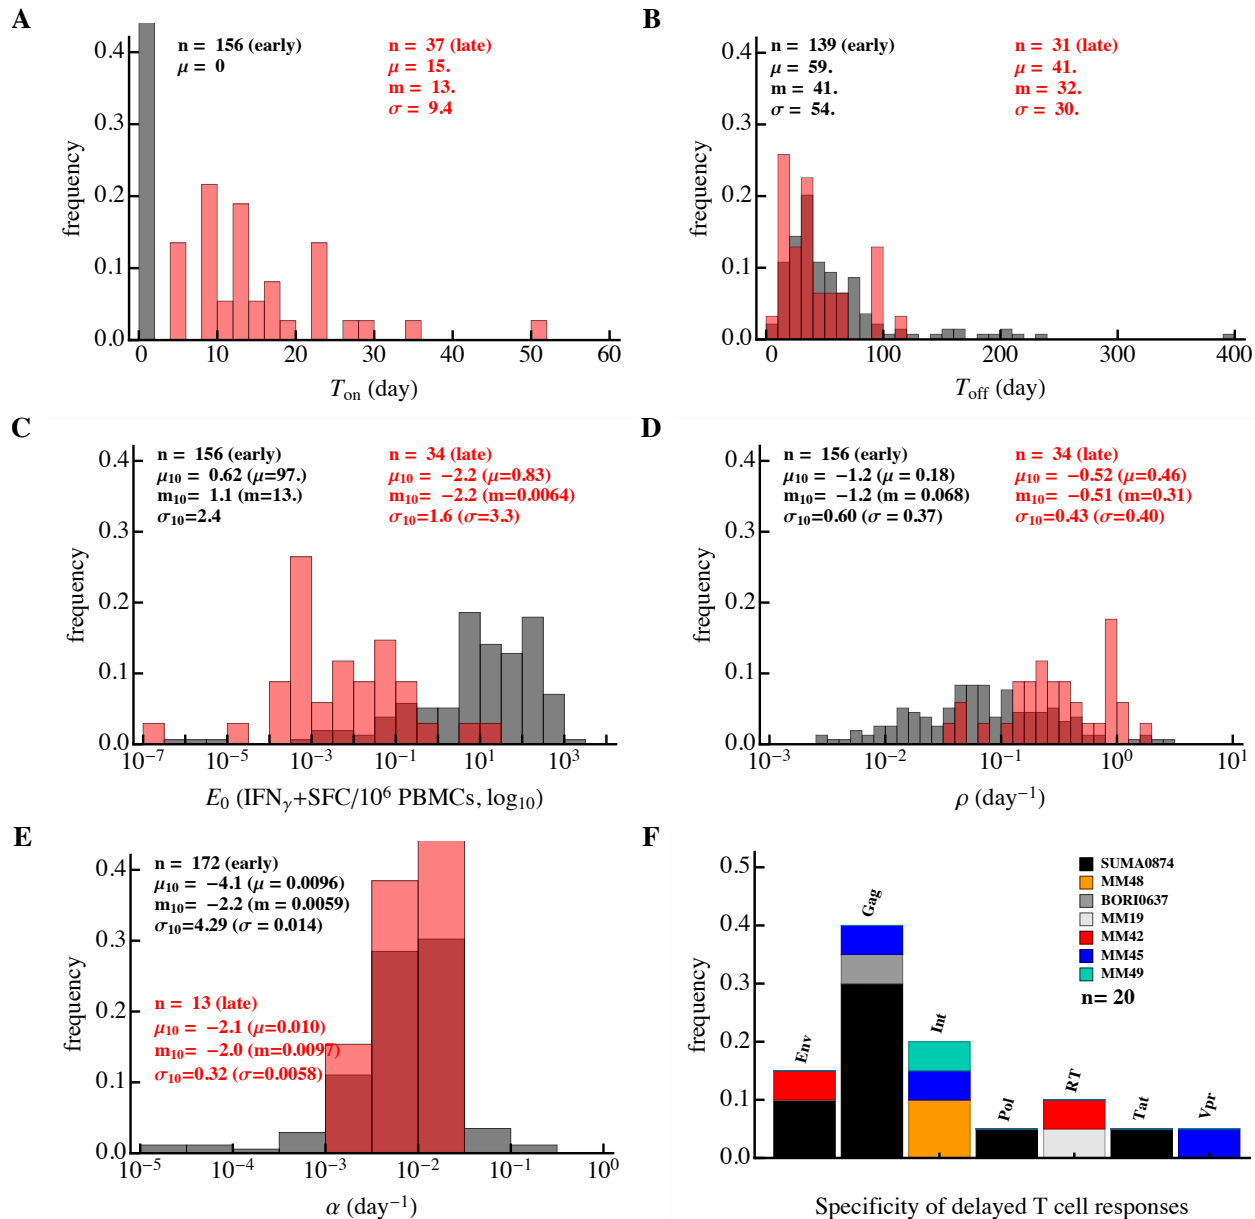

**Figure 6:** Differences in the kinetics of early and late HIV-specific CD8<sup>+</sup> T-cell responses. We fitted the  $T_{on}/T_{off}$  model (eqn. (1)) to the data on the dynamics of epitope-specific CD8<sup>+</sup> T-cell response in each patient and plotted the distribution of the estimated parameters. The results are presented separately for T cell responses that started expanding (or contracting) from the first observation (“early” responses, about 80% of all responses; black) or delayed responses, which were undetectable at one or several initial time points (“late” responses; red). Panels show distributions for (A) time of expansion of T-cell response ( $T_{on}$ ), (B) time to peak of each T-cell response ( $T_{off}$ ), (C) initial predicted frequency of epitope-specific CD8<sup>+</sup> T cells ( $E_0$ ), (D, E) expansion ( $\rho$ ) and contraction ( $\alpha$ ) rates of T-cell responses, respectively, and (F) proteins recognized by late CD8<sup>+</sup> T cell responses. In A–E,  $n$  represents the number of fitted responses, and  $\mu$ ,  $m$  and  $\sigma$  represent mean, median and standard deviation, respectively ( $\mu_{10}$ ,  $m_{10}$ , and  $\sigma_{10}$  are mean, median and standard deviation for log<sub>10</sub>-scaled parameters). Late responses were predicted to have a higher expansion rate  $\rho$  (Mann–Whitney,  $p < 0.001$ ) and smaller frequency  $E_0$  (Mann–Whitney,  $p < 0.001$ ) than early responses.

316 Several parameter estimates differed between the two response subsets. In general, early re-  
317 sponses expanded slower, peaked later, and had a higher predicted frequency  $E_0$  than late responses  
318 (Fig. 6). The average delay  $T_{\text{on}}$  in the expansion kinetics of late responses was only 15 days since  
319 symptom onset but some responses started expanding even later (Fig. 6A). There was a minor  
320 difference in the timing of the T-cell response peak (Mann–Whitney,  $p = 0.035$ ) and over 90% of  
321 epitope-specific CD8<sup>+</sup> T-cell responses peaked before 100 days since symptom onset (Fig. 6B).

322 For the early responses, we found that there was an average of 97 antigen-specific CD8<sup>+</sup> T cells  
323 per million peripheral blood mononuclear cells (PBMC) detected at the first time point (median,  
324 13 IFN- $\gamma^+$  spot forming cells (SFC) per million PBMC, Figure 6C). Note that this is not very  
325 different from the experimental estimates of the frequency of human naive CD8<sup>+</sup> T cells specific to  
326 viral epitopes [87, 99]. To predict a theoretical frequency  $E_0$  at which late responses would start  
327 to expand exponentially from  $t = 0$  days since symptom onset, we extended the fitted curve in the  
328 negative time direction to estimate the intercept with the  $y$ -axis. Around 24% of epitope-specific  
329 CD8<sup>+</sup> T-cell responses including many “delayed” responses were predicted to have a precursor  
330 frequency  $E_0 < 10^{-2}$  per million PBMC. Because this estimate is physiologically unreasonable  
331 [87, 99], many of the “late” responses are likely to have started expanding after the onset of  
332 symptoms (i.e., were “delayed”).

333 Importantly, the majority (60%) of early epitope-specific CD8<sup>+</sup> T cells expanded extremely  
334 slowly at a rate of  $< 0.1 \text{ day}^{-1}$  (median,  $0.068 \text{ day}^{-1}$ , Fig. 6D). An expansion rate of  $0.1 \text{ day}^{-1}$   
335 corresponds to a doubling time of 7 days and this suggests that even in acute infection the majority  
336 of HIV-specific T cell responses expanded very slowly. In contrast, delayed responses expanded  
337 significantly faster, with a median rate  $\rho = 0.31/\text{day}$ , which was only slightly lower than the T  
338 cell expansion rate in response to the yellow fever virus vaccine [61]. A small fraction of early  
339 responses (6%) expanded at a fast rate of  $> 0.5 \text{ day}^{-1}$ , but most responses contracted very slowly  
340 at a rate of  $< 0.01 \text{ day}^{-1}$  (Fig. 6E). This implies that HIV-specific T-cell responses were relatively  
341 stable after their peak with a half-life of 70 days or longer. Thus, our analysis suggests that  
342 most HIV-specific CD8<sup>+</sup> T cell responses expand slowly, peak early, and remain relatively stable  
343 thereafter.

344 It was unclear why not all T-cell responses started expanding from symptom onset when viral  
345 loads are relatively high (Fig. S4). For example, CD8<sup>+</sup> T-cell responses to multiple epitopes of  
346 influenza virus or lymphocytic choriomeningitis virus (LCMV) in mice appear to start expanding  
347 almost simultaneously [81, 88, 100–102]. One hypothesis is that late T cell responses are restricted  
348 to proteins that are not expressed at high levels during the HIV life cycle. However, this hypothesis  
349 was not supported by our data as delayed T-cell responses recognized multiple proteins, similarly  
350 to all T-cell responses in the cohort (Fig. 2A and Fig. 6F). A second explanation is that these  
351 delayed responses may be actively suppressed by the early responses. To investigate this, we  
352 calculated the Pearson correlation coefficients between 20 delayed responses (with a predicted  
353 frequency  $E_0 < 0.01$ , i.e.,  $T_{\text{on}} > 0$ ) and all other responses in these patients; most of these  
354 delayed responses were specific to Gag and found predominantly in patient SUMA0874 (Fig. 2A  
355 and Fig. 6F). Interestingly, only 20% of these correlations were negative, suggesting that other  
356 early responses continued expanding as late responses appeared. The observation that most early  
357 responses peaked after starting to expand further argues against an “active” suppression of delayed  
358 responses by early responses. Third, it is possible that late responses simply start from a smaller  
359 number of precursors [87]; this hypothesis could not be tested with our current data because  
360 estimated frequencies  $E_0$  are unlikely to be true precursor frequencies. Fourth and finally, delayed  
361 expansion in the blood could simply be due to the retention of expanding T cell populations in  
362 the lymphoid tissues. Testing this hypothesis would require measurements of HIV-specific T cell

363 responses in the lymph nodes and/or spleen. Taking together, the reasons why some HIV-specific  
364 CD8<sup>+</sup> T cell responses appear late in the blood of infected patients remain unclear.

### 365 **3.4 Evidence of intraclonal competition of CD8<sup>+</sup> T cells**

366 Magnitude of epitope-specific CD8<sup>+</sup> T-cell response is likely to be important in limiting virus  
367 replication (Fig. 5). However, factors that influence the expansion kinetics of the CD8<sup>+</sup> T cell  
368 response and response peak in humans remain poorly defined. Recent work suggested that viral  
369 load in the blood of human volunteers during vaccination is the major determinant of the peak  
370 T-cell response following yellow fever virus vaccination [103]. We found that the frequency  $E_0$  had  
371 a limited impact on the timing of the T-cell response peak (Fig. 7A) and the rate of T-cell response  
372 expansion strongly affected the timing of the peak (Fig. 7B). The latter suggests that more rapidly  
373 expanding responses peak early, which is markedly different from CD8<sup>+</sup> T-cell responses in mice  
374 infected with LCMV where T-cell responses, specific to different viral epitopes, expand at different  
375 rates but peak at the same time [86, 88, 100, 101].

376 Interestingly, we found that the expansion rate of epitope-specific T cell responses was strongly  
377 dependent on the average viral load during the expansion phase (Fig. 7C) and on the estimated  
378 frequency  $E_0$  (Fig. 7D). The dependence of the expansion rate on viral load was nonlinear, in  
379 contrast with the linear or “saturating” function used in mathematical models describing the  
380 dependence of T cell proliferation rate on viral load [64, 66, 71, 86, 93, 104]. The observed decline  
381 in expansion rate of T-cell responses with a higher frequency  $E_0$  strongly indicates the presence of  
382 intraclonal competition, suggesting that increasing precursor frequency of T cells by vaccination  
383 (an expected result of vaccination) may dramatically reduce expansion kinetics of such responses  
384 following exposure to HIV and this may limit T cell efficacy in controlling virus replication.  
385 Similar intraclonal competition was also documented in some cases with T cell responses in mice  
386 [105, 106]. In particular, increasing the number of chicken ovalbumin-specific naive CD8<sup>+</sup> T cells  
387 in mice reduced the expansion rate of the ovalbumin-specific CD8<sup>+</sup> T cell population following  
388 priming with ovalbumin [105].

389 Both the average viral load and predicted frequency  $E_0$  had minimal impact on the peak  
390 CD8<sup>+</sup> T-cell response (Fig. 7E&F); interestingly, no correlation between CD8<sup>+</sup> T cell precursor  
391 frequency and peak T-cell response was found in mice [105]. The length of the expansion phase  
392 ( $T_{\text{off}} - T_{\text{on}}$ ) had little influence on the peak immune response (not shown). It is therefore possible  
393 that the peak immune response was determined by virus-independent factors (e.g., cytokines);  
394 further analyses are needed to better understand the mechanisms limiting the magnitude of T cell  
395 responses to HIV.

396 It has been previously proposed that some viral infections such as HIV and hepatitis C virus  
397 in humans and LCMV in mice induce a delayed CD8<sup>+</sup> T-cell response, and this delayed response  
398 results in viral persistence [107, 108]. We sought to determine whether HIV-specific CD8<sup>+</sup> T-cell  
399 responses appear late in infection compared, for example, to viruses causing only acute infections  
400 in humans. It is clear that the expansion kinetics of virus-specific CD8<sup>+</sup> T cell responses are likely  
401 to depend on viral load (e.g., Fig. 7C&D). Therefore, for an appropriate comparison of acute and  
402 chronic viral infections we calculated the time intervals between the maximum observed viral load  
403 and the time when epitope-specific CD8<sup>+</sup> T cells were predicted to reach their peak ( $T_{\text{off}}$ ). About  
404 40% of HIV-specific T cells peaked only 10 days after the maximum viremia (not shown). A 10-  
405 day delay in CD8<sup>+</sup> T-cell response peak after the peak viremia is similar to that which has been  
406 observed following yellow fever vaccination [60, 61]. Therefore, these results suggest that many  
407 HIV-specific CD8<sup>+</sup> T-cell responses are generated with similar kinetics relative to viral load for

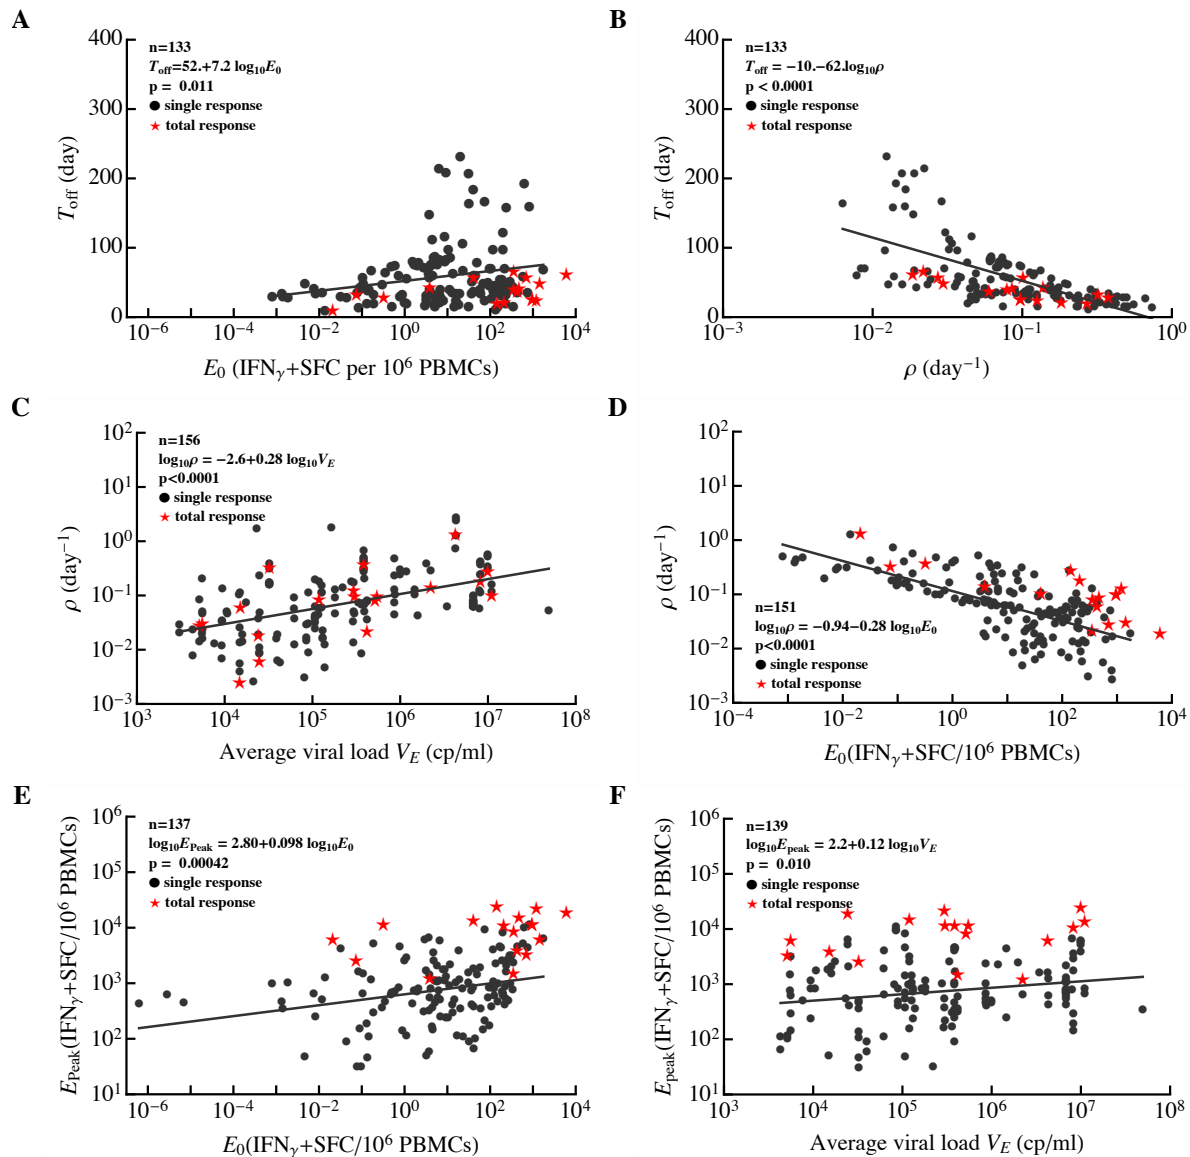

**Figure 7:** Correlations between major parameters determining dynamics of HIV-specific CD8 $^{+}$  T-cell responses in acute infection. For all epitope-specific CD8 $^{+}$  T-cell responses in all 22 patients (circles) or the total HIV-specific CD8 $^{+}$  T-cell response per patient (stars), we estimated the initial frequency of epitope-specific CD8 $^{+}$  T cells ( $E_0$ ), rate of expansion of T cell populations ( $\rho$ ), time of the peak of the response ( $T_{\text{off}}$ ), rate of contraction of the immune response after the peak ( $\alpha$ ), predicted peak values reached by the epitope-specific CD8 $^{+}$  T-cell response ( $E_{\text{peak}} = E(T_{\text{off}})$ ), and the average viral load ( $V_E$ ). Solid lines denote regression lines; regression equations and  $p$  values are indicated on individual panels for all epitope-specific CD8 $^{+}$  T-cell responses. The total HIV-specific CD8 $^{+}$  T-cell response showed a similar trend to all epitope-specific CD8 $^{+}$  T-cell responses (results not shown). Panels show correlations between the timing of the immune response peak  $T_{\text{off}}$  and predicted frequency  $E_0$  (A),  $T_{\text{off}}$  and  $\rho$  (B), expansion rate  $\rho$  and average viral load  $V_E$  (C),  $\rho$  and  $E_0$  (D), peak immune response  $E_{\text{peak}}$  and  $E_0$  (E), and  $E_{\text{peak}}$  and  $V_E$  (F). For a given patient, we calculated the total HIV-specific CD8 $^{+}$  T cell response as the sum of all epitope-specific CD8 $^{+}$  T-cell responses at the same time point (i.e., by ignoring “nd”). For patient MM42, we could not fit the  $T_{\text{on}}/T_{\text{off}}$  model to the dynamics of total CD8 $^{+}$  T cell response data because of wide oscillations in the data. Identified relationships did not change if estimates for responses with unphysiological initial frequencies ( $E_0 \leq 10^{-2}$ ) were excluded from the analysis (results not shown).

408 both acute and chronic infections in humans and yet most of them expand significantly slower than  
409 during an acute viral infection. This could, in part, be simply a consequence of HIV replication  
410 being slower than yellow fever virus replication.

### 411 3.5 Evidence of interclonal competition of CD8<sup>+</sup> T cells

412 Many mathematical models of the CD8<sup>+</sup> T-cell response to HIV assume competition between  
413 responses specific to different viral epitopes [64, 68, 71]. In fact, the presence of such competition  
414 is important for explaining the kinetics and timing of viral escape from CD8<sup>+</sup> T-cell responses  
415 [64, 71]. However, to our knowledge, there is no experimental evidence of competition between  
416 different CD8<sup>+</sup> T-cell responses in HIV infection. Studies of CD8<sup>+</sup> T-cell responses to intracellular  
417 pathogens in mice reached conflicting conclusions, with some reporting no evidence for competition  
418 [73, 78, 100, 109] and others reporting some evidence for competition [77, 82, 110, 111]. A recent  
419 analysis of data on the magnitude of CD8<sup>+</sup> T-cell responses specific to several HIV epitopes found  
420 no evidence for such interclonal competition during the chronic phase of HIV infection [83].

421 This previous study suffered from two major limitations: only a few CD8<sup>+</sup> T-cell responses  
422 were analyzed, and the analysis was restricted to a single time point [83]. Therefore, we sought  
423 to determine if there is any evidence for competition between T-cell responses specific to different  
424 viral epitopes in the data of Turnbull *et al.* [55]. If there is competition between two responses, we  
425 expect that an increase in the magnitude of one response should lead to a decline in the magnitude  
426 of another, i.e., there should be a negative correlation between longitudinal changes in magnitudes  
427 of the two responses (Fig. S14). We therefore calculated correlations between magnitudes of all  
428 pairs of epitope-specific CD8<sup>+</sup> T-cell responses over time for every patient (Fig. 8). The proportion  
429 of negative correlations indicating potentially competing immune responses varied by patient and  
430 was not strongly dependent on the time since infection (e.g., see Fig. S15). In some patients,  
431 the proportion of positively and negatively correlated responses were similar (e.g., MM39, MM47,  
432 MM51) but in most patients, negative correlations were significantly under-represented as judged  
433 by the binomial test (Fig. 8). Overall, approximately 18% of correlation coefficients were negative,  
434 suggesting that a small proportion of T-cell responses may be competing during the infection.  
435 However, in contrast with the assumptions of many mathematical models, the vast majority of  
436 responses do not appear to compete during the infection.

437 Previous analysis also suggested that in the presence of competition between epitope-specific  
438 CD8<sup>+</sup> T cells, a larger number of responses should result in a smaller average size of epitope-  
439 specific T cell response [83]. However, Fryer *et al.* [83] did not find a significant correlation  
440 between the number of responses and average size of epitope-specific T-cell response, indicating  
441 an absence of competition. One potential problem with this previous analysis was that it did not  
442 take viral load into account in the correlation, and it is possible that viral load may affect the  
443 strength of competition. For example, competition may be weak at high viral loads owing to an  
444 abundance of the antigen, and may be strong at lower viral loads (or vice versa). Furthermore, we  
445 showed that viral load influences the dynamics of HIV-specific CD8<sup>+</sup> T-cell responses (Fig. 7C)  
446 and thus may confound the correlation. Therefore, we repeated the analysis of Fryer *et al.* [83] by  
447 dividing the cohort data into three groups with different average viral loads (low, intermediate,  
448 and high, Fig. 9). During the acute infection ( $t \leq 100$  days after symptom onset) there was  
449 a statistically significant negative correlation between the number of responses and the number  
450 of T-cell responses (Fig. 9C) suggesting interclonal competition. However, significant negative  
451 correlations were not observed for all time periods or all viral loads (e.g.,  $t > 100$  with low or  
452 high viral load, Fig. S12); thus, overall, by correcting for multiple comparisons we must conclude



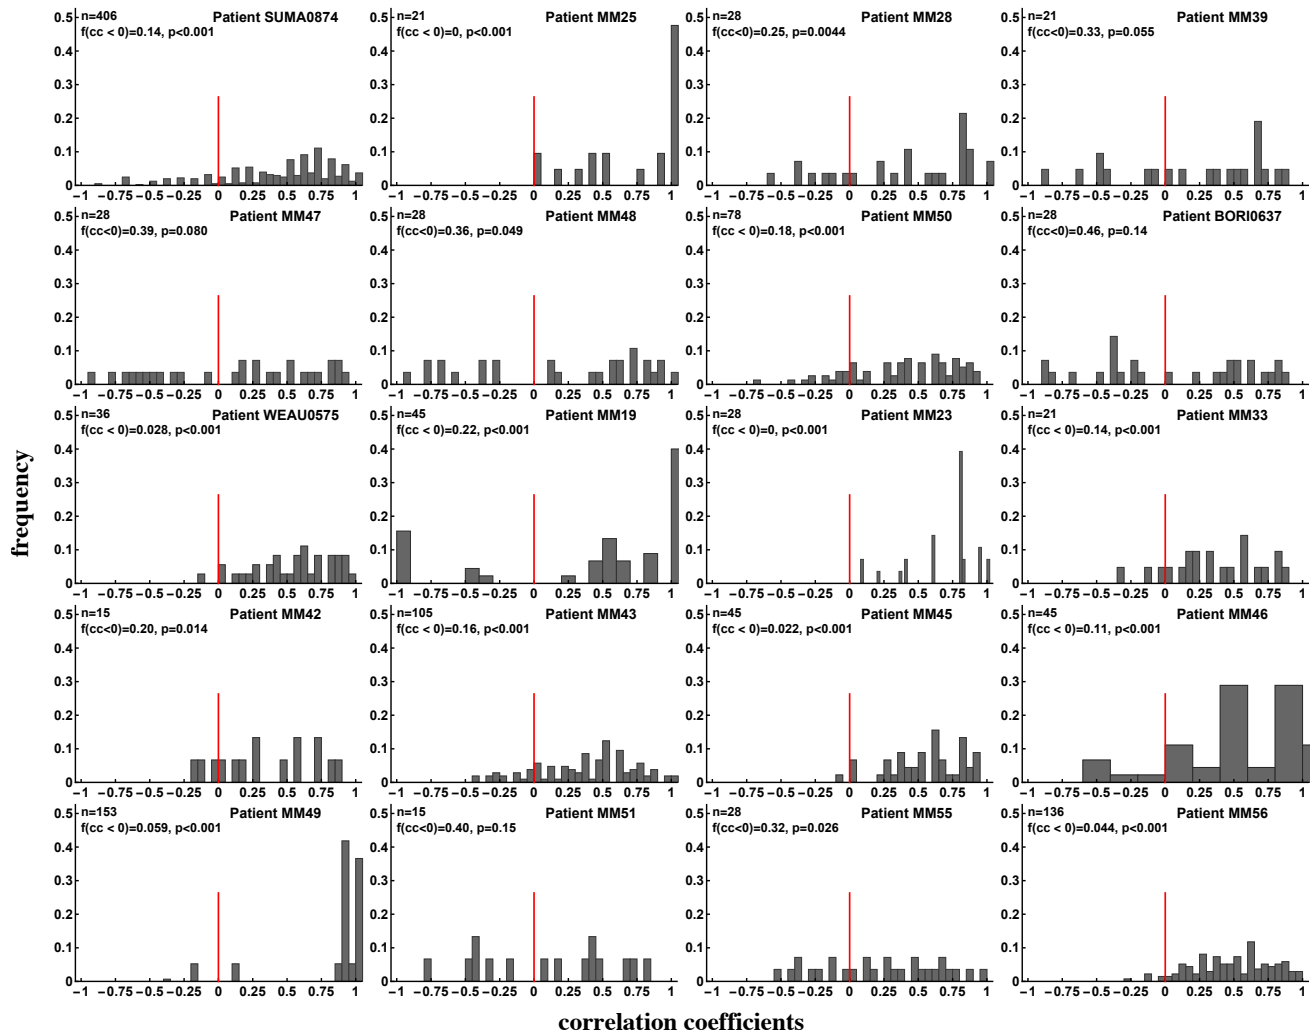

**Figure 8:** Evidence of interclonal competition between epitope-specific CD8<sup>+</sup> T cell responses. We calculated Spearman's rank correlation coefficients between longitudinal changes of pairs of epitope-specific CD8<sup>+</sup> T cell responses in a given patient (see individual panels) and plotted the distribution of these coefficients. Panels show the number of correlations ( $n$ ), fraction of negative correlation coefficients ( $f(cc) < 0$ ), and  $p$  values for the deviance of the distribution from uniform, found using the binomial test with null being the equal fraction of positive and negative correlations. We found that the majority of CD8<sup>+</sup> T cell populations expand and contract in unison and therefore do not appear to compete during the infection. Overall, discordant dynamics (negative correlation coefficients) were observed for 18% of all responses irrespective of the stage of infection (acute or chronic). Patients MM38 and MM40 were excluded from the analysis for having too few correlation pairs (two or three).

453 that there is no correlation between T-cell response breadth and average size of epitope-specific  
 454 T-cell response. The two types of analyses (longitudinal in Fig. 8 and cross-sectional in Fig. 9)  
 455 may thus have different power in detecting competition between immune responses. Our analysis  
 456 of longitudinal data suggests that a sizable proportion of HIV-specific T-cell responses may be  
 457 competing during infection.

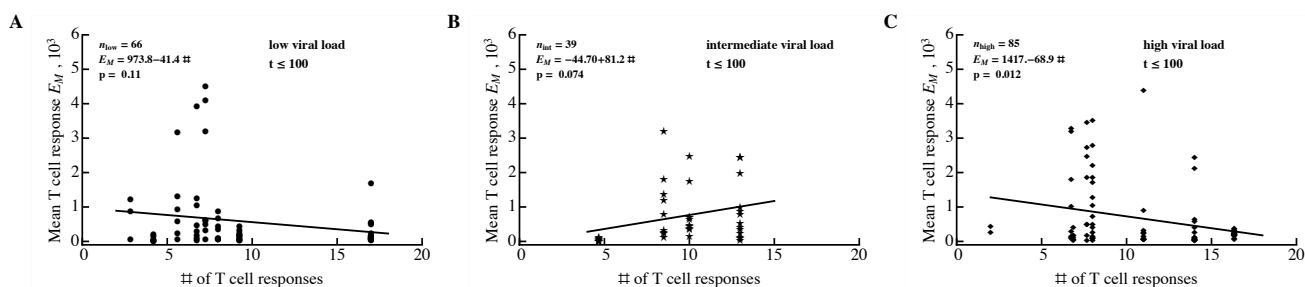

**Figure 9:** Average size of epitope-specific CD8<sup>+</sup> T-cell response is unrelated to the number of HIV-specific T-cell responses. For every patient, we calculated the average number of HIV-specific CD8<sup>+</sup> T-cell responses and the average density of epitope-specific T cells in a given observation period. To exclude the contribution of viral load to this relationship, we divided all 22 patients into three groups according to their mean viral load (low log<sub>10</sub> viral load: 3.40–4.44; intermediate viral load: 4.60–5.03; high viral load: 5.25–6.83). Groups were estimated using the Manhattan Distance with the `FindClusters` function in `Mathematica`. Regression lines and corresponding *p* values are indicated on individual panels. Overall, results varied by time period and most correlations were not statistically significant (Fig. S12).

## 4 Discussion

It is generally accepted that CD8<sup>+</sup> T cells play an important role in controlling HIV replication. Features of HIV-specific CD8<sup>+</sup> T cell responses that are important in mediating this control remain incompletely understood. T cell specificity, polyfunctionality and ability to proliferate have been cited as important correlates of protection [17, 33, 47, 112]. Here, we analyzed the kinetics of the CD8<sup>+</sup> T cell response to the whole HIV proteome in patients controlling HIV poorly, and thus identified features associated with poor viral control.

In these patients, HIV infection induced a reasonably large number of CD8<sup>+</sup> T-cell responses, most of which were generated during the earliest stages of infection (first 35 days after symptom onset). On average, CD8<sup>+</sup> T cell response breadth increased moderately during the first month since symptom onset and remained relatively stable for the next year. However, breadth varied differently in individual patients. In some patients, breadth increased twofold over the course of 2 months after symptom onset, and in some patients, breadth remained constant or even declined. Importantly, a minimal change in CD8<sup>+</sup> T-cell response breadth from symptom onset to chronic phase was also observed in three patients from the Center of HIV Vaccine Immunology cohort [93]. However, our finding seems to contradict a conclusion reached by Turnbull *et al.* [55] who found that the median breadth of CD8<sup>+</sup> T-cell response increased from 2 to 6. The major difference between our analysis and the previous study is how we counted responses. Turnbull *et al.* [55] only counted responses that peaked within 2–3 weeks post symptoms, whereas we counted all detected responses.

Because of the high variability in the rate of exponential growth of CD8<sup>+</sup> T-cell responses (e.g., Fig. 7B) it is perhaps expected that only few rapidly expanding responses should be observed early in infection. Later in infection, immune response with slower expansion rates would be detected, creating the impression of T-cell response breadth increasing with time. This idealistic interpretation may be an artifact of a limited sensitivity of ELISPOT and difficulty tracking T cell response at the place of their generation, i.e., secondary lymphoid tissues. Better methods of T cell response detection in the blood and tissues are likely to provide a more complete picture of the dynamics of T cell response breadth.

Because T cell response breadth may not be stable over the course of infection in individual

487 patients, interpreting relationships between the breadth and other parameters, e.g., viral load,  
488 must be done with care. For example, it was observed that a change in the number of Gag-specific  
489 CD8<sup>+</sup> T cell responses with time was dependent on a patient's viral load, suggesting that a larger  
490 breadth in chronic HIV infection may be the consequence and not the cause of a lower viral load  
491 [97].

492 We found no significant correlation between breadth, *SE*, or *EI* of HIV-, Gag-, or Env-specific  
493 CD8<sup>+</sup> T-cell responses and viral load. This was in contrast with several (but not all) previous  
494 studies that identified a statistically significant negative correlation between the number of Gag-  
495 specific T cell responses and viral load [33, 34, 36, 91]; some of those studies included patient  
496 cohorts of a similar size. This could be due to limited power in our study. Power analysis  
497 indicated that for a sufficiently large number of patients, statistically significant correlations could  
498 be found; however, such correlations were dependent on the measure of immune response efficiency.  
499 Efficiency measured as the number of Gag-specific T cell responses was negatively correlated with  
500 viral load, whereas *EI* for HIV- or Gag-specific T-cell responses was positively correlated with  
501 viral load. The latter result, if confirmed in a larger cohort, is surprising, since T-cell responses of  
502 a similar magnitude were predicted to limit viral escape from T cells [56, 93], and would therefore  
503 be expected to lead to a lower viral load.

504 It is not clear whether the small number of patients in our cohort ( $n = 22$ ) was responsible for  
505 the absence of a statistically significant correlation. Two previous studies also involved a relatively  
506 small number of patients and yet reached a statistically significant negative correlation between  
507 the number of Gag-specific T-cell responses and viral load [34, 91]. Statistically significant results  
508 may arise in underpowered studies by chance [113], and a small number of patients in the study  
509 by Radebe *et al.* [91] may indicate an accidental statistically significant correlation. To investigate  
510 the potential difference between our result and that from Geldmacher *et al.* [34], we reanalyzed  
511 the data from the latter (data were provided by Chriss Geldmacher). The re-analysis revealed  
512 several major differences between our study and theirs. First, we found that Geldmacher *et al.*  
513 [34] detected more Gag-specific responses than Env-specific responses (slope of the Env vs. Gag  
514 regression was 0.11 with  $p \ll 10^{-3}$  when compared to slope = 1;  $t$  test). In Turnbull *et al.* [55] data,  
515 the number of Gag and Env-specific T-cell responses were more similar (slope = 0.56,  $p = 0.07$   
516 for the comparison with slope = 1;  $t$  test). Second, the correlation strength between the number  
517 of Gag-specific T-cell responses and viral load was previously overestimated; a non-parametric  
518 Spearman's rank correlation test resulted in a higher, but still significant,  $p$  value ( $p = 0.013$ )  
519 than that found previously (see Fig. 2 in [34]; the published value was  $p = 0.0016$ ). Third and  
520 finally, we found that the statistical significance of the negative correlation was driven exclusively  
521 by four patients (out of 54) with a large number of Gag-specific responses ( $\geq 6$ ); removing these  
522 patients from the analysis made the correlation between viral load and number of Gag-specific  
523 CD8<sup>+</sup> T-cell responses statistically nonsignificant ( $p = 0.085$ , results not shown). Resampling  
524 data from 18–22 patients from the Geldmacher *et al.* [34] cohort with replacement demonstrated  
525 low power in correlation between T-cell response breadth and viral load (power = 46%); however,  
526 including the four outliers with high numbers of Gag-specific T-cell responses increased the power  
527 to 63% (not shown). Together, these results suggest that the potential protection by Gag-specific  
528 T-cell responses may not extend to all Gag-specific T-cell responses and may be a feature of only  
529 some patients. This interpretation is consistent with previous analyses that only looked at T-cell  
530 responses to defined Gag epitopes, and not to the whole gene [33, 96]. More studies are needed  
531 to understand the protective nature of Gag-specific CD8<sup>+</sup> T-cell responses; for example, the  
532 breadth of Gag-specific CD8<sup>+</sup> T-cell responses did not predict the control of HIV after cessation  
533 of antiretroviral therapy in patients treated for acute HIV infection [114].

534 An additional important part of our analysis is an illustration of other metrics that can be  
535 used to evaluate the potential efficacy of CD8<sup>+</sup> T cell responses such as *SE* and *EI*. While it is  
536 clear they can complement a commonly used measure of efficacy (response breadth), these metrics  
537 have a strong limitation in that they ignore data from patients with no immune response, and  
538 *EI* is ill-defined for cases when only one immune response is present. Furthermore, calculation of  
539 these metrics requires measurement of the magnitude of epitope-specific T-cell responses.

540 By fitting a simple mathematical model to the longitudinal dynamics data for epitope-specific  
541 CD8<sup>+</sup> T-cell responses, we estimated the parameters for T-cell responses in HIV infection. We  
542 predict that the vast majority of HIV-specific T cell responses (80%) recognize HIV early and ex-  
543 pand (or are already contracting) during the onset of symptoms. These T-cell responses expanded  
544 extremely slowly, at a rate of  $< 0.1 \text{ day}^{-1}$ , indicating that vaccines may need to induce responses  
545 with significantly quicker expansion kinetics. A small proportion of responses (20%) had a delayed  
546 expansion, and these late responses expanded at significantly higher rates than early responses.  
547 All responses appeared to be relatively stable after reaching their peak (the contraction rate was  
548  $< 0.01 \text{ day}^{-1}$  for most epitope-specific CD8<sup>+</sup> T cells).

549 Slow expansion of the early T-cell responses may be due to intraclonal competition for resources  
550 such as antigens. Indeed, we found a strong negative correlation between the predicted initial  
551 frequency of the response and the rate of response expansion, which is consistent with the presence  
552 of intraclonal competition. Several previous reports documented the presence of such competition  
553 under some, often unphysiological, circumstances (e.g., by artificially increasing the number of  
554 naive CD8<sup>+</sup> T cells specific to an antigen) [105, 106, 115]. Slow expansion of T-cell responses  
555 may also arise as an artifact of the measurement of T-cell response magnitude as frequency (i.e.,  
556 number of spots per million PBMC); however, because most of our total responses reach only about  
557 1% of PBMCs (e.g., Fig. 7E) and in general, about 10% of PBMCs are CD8<sup>+</sup> T cells (personal  
558 communication from Seph Borrow), this alternative seems unlikely. The presence of intraclonal  
559 competition may strongly limit the magnitude of epitope-specific T-cell responses induced by  
560 vaccination.

561 A previous study found that the amount of yellow fever virus in the blood of volunteers greatly  
562 affects the magnitude of CD8<sup>+</sup> T-cell response induced by vaccination [103]. In our analysis,  
563 however, this correlation was not significant if we corrected for multiple comparisons (Fig. 7F).  
564 More work is needed to understand the factors regulating the magnitude of the T cell response  
565 following acute and chronic viral infections, as these may be different.

566 If broad HIV- or Gag-specific CD8<sup>+</sup> T-cell responses are protective (as several studies have  
567 suggested; see above), induction of a broad T cell response may be difficult in the presence of in-  
568 terclonal competition. One previous study suggested that interclonal competition between CD8<sup>+</sup>  
569 T-cell responses specific to different viral epitopes is absent in chronic HIV infection [83]. Inter-  
570 estingly, we found that the vast majority of HIV-specific T-cell responses (about 82%) appeared  
571 to have “synchronous” dynamics. Yet a substantial fraction of all responses did show evidence  
572 of competition when an increase in the magnitude of one response was associated with a decline  
573 in another (Fig. 8). The relative fraction of such potentially “competing” T-cell responses varied  
574 by patient. Interestingly, using the method of Fryer *et al.* [83] to correlate the average size and  
575 number of T-cell responses did not allow the detection of competition. This indicates that longi-  
576 tudinal data may provide a higher power for detecting competition between epitope-specific CD8<sup>+</sup>  
577 T-cell responses. Our results thus suggest that interclonal competition may potentially limit the  
578 breadth of vaccine-induced CD8<sup>+</sup> T-cell responses.

579 It should be emphasized, however, that correlation does not necessarily indicate causality  
580 and negative associations between kinetics of individual T cell responses may arise for reasons

581 unrelated to competition. Understanding why some responses are discordant while others increase  
582 or decrease in unison is likely to shed more light on the degree of T cell competition during HIV  
583 infection. Recent work suggests that competition between HIV-specific CD8<sup>+</sup> T cells for access to  
584 infected cells may influence the rate of virus escape [71, 93]. Detecting competition in a biological  
585 system is a complicated problem (e.g., [116]). Direct fitting of classical mathematical models  
586 (Lotka–Volterra and predator–prey) revealed that these models can be consistent with some data  
587 but in some cases failed to accurately describe the data (results not shown). Therefore, using  
588 mathematical models alone does not allow discrimination between alternative mechanisms of T-  
589 cell response competition, and further experiments are needed. One possible way of investigating  
590 whether responses compete is to boost the magnitude of a given response (e.g., by therapeutic  
591 vaccination) and see if this influences the magnitude of other T cell responses. Clinical evidence  
592 suggests there is limited competition between humoral immune responses specific to different  
593 infections [117].

594 A number of important caveats could not be addressed in this study. These include issues  
595 with experimental data and mathematical model assumptions. First, CD8<sup>+</sup> T-cell responses were  
596 mapped at 6 months after symptom onset, so some T-cell responses appearing earlier or later  
597 than that time point could have been missed in the analysis. It is important to note, though,  
598 that mapping of CD8<sup>+</sup> T-cell responses is often done at a single time point (e.g., [54, 56, 58]),  
599 meaning such analyses suffer from a similar limitation. Second, the IFN $\gamma$  ELISPOT may not be  
600 sensitive enough to detect all the responses, and some evidence suggests that the sensitivity of  
601 this method may vary during the infection [59]. This is likely to affect some parameters but not  
602 others; for example, estimates of the rate of expansion of HIV-specific CD8<sup>+</sup> T cell responses are  
603 likely to be dependent on ELISPOT sensitivity. Third, responses were measured only in the blood  
604 whereas interactions between the virus and T cells occur in lymphoid tissues. This problem is  
605 unlikely to be resolved in human studies because it will be difficult to obtain longitudinal samples  
606 of lymphoid tissues from patients. Fourth, the simple  $T_{\text{on}}/T_{\text{off}}$  model may not fully describe T-cell  
607 response kinetics, especially during early acute infection. However, this model has been successful  
608 in describing the dynamics of the CD8<sup>+</sup> T-cell response to viral infections in both mice and humans  
609 [61, 86, 88, 118]. Fifth, averaging of the viral load to infer correlations between parameters may  
610 not be fully appropriate because in many patients there were large changes in viral load over  
611 time (Fig. S4). However, explicit inclusion of viral load dynamics in some simple models proved  
612 difficult (results not shown). Sixth, the data do not include the virus ramp-up phase, meaning  
613 the earliest CD8<sup>+</sup> T-cell responses may be missed. Indeed, this might be an issue with many of  
614 the recent analyses and, to date, the available data on CD8<sup>+</sup> T-cell response during the virus  
615 expansion phase are limited. It should be noted that the data in which viral load in the blood  
616 is measured soon after exposure (e.g., [84]) often comes from individuals who are at high risk of  
617 acquiring HIV infection, and thus virus dynamics in such patients may not represent an “average”  
618 patient. Finally, alignment of patient’s data by the day since symptom onset may be misleading  
619 as different patients are likely to experience symptoms at different times after infection. Methods  
620 such as Fiebig staging or Poisson fitter may allow better alignment data in terms of days since  
621 infection [119, 120] but the accuracy of these novel methods has not been well studied, in part,  
622 because the exact date for HIV infection is rarely known.

623 In summary, our study provides basic information on the kinetics of CD8<sup>+</sup> T cell responses  
624 specific to the whole HIV proteome given the limitations of current methods of measuring such  
625 responses in humans. Understanding the complex underlying biology of interactions between  
626 the virus and virus-specific CD8<sup>+</sup> T-cell response, and of the factors driving changes in T cells,  
627 is instrumental in determining which T-cell-based vaccines induce a T-cell response exceeding

628 that induced during natural HIV infection. We expect that such vaccines alone would induce  
629 responses with a substantial impact on virus replication. Results of the present analysis will also  
630 be helpful in developing better calibrated mathematical models of T-cell responses to HIV, which  
631 will be valuable in predicting whether and how T-cell-based vaccines can provide protection upon  
632 infection with the virus [10, 121].

## 633 References

- 634 1. Demberg, T. & Robert-Guroff, M. 2012 Controlling the HIV/AIDS epidemic: current status  
635 and global challenges. *Front Immunol*, **3**, 250. doi:10.3389/fimmu.2012.00250.
- 636 2. Maartens, G., Celum, C. & Lewin, S. R. 2014 HIV infection: epidemiology, pathogenesis,  
637 treatment, and prevention. *Lancet*, **384**(9939), 258–271. doi:10.1016/S0140-6736(14)60164-1.
- 638 3. Uberla, K. 2008 HIV vaccine development in the aftermath of the STEP study: re-focus on  
639 occult HIV infection? *PLoS Pathog*, **4**(8), e1000114.
- 640 4. Cohen, J. 2009 HIV/AIDS research. Beyond Thailand: making sense of a qualified AIDS  
641 vaccine "success". *Science*, **326**(5953), 652–3.
- 642 5. Fuchs, J. D., Sobieszczyk, M. E., Hammer, S. M. & Buchbinder, S. P. 2010 Lessons drawn  
643 from recent HIV vaccine efficacy trials. *J Acquir Immune Defic Syndr*, **55 Suppl 2**, S128–  
644 S131. doi:10.1097/QAI.0b013e3181fbca02.
- 645 6. Barouch, D., Santra, S., Schmitz, J., Kuroda, M., Fu, T., Wagner, W., Biliska, M., Craiu, A.,  
646 Zheng, X. *et al.* 2000 Control of viremia and prevention of clinical AIDS in rhesus monkeys  
647 by cytokine-augmented DNA vaccination. *Science*, **290**(5491), 486–92.
- 648 7. Shiver, J. W., Fu, T. M., Chen, L., Casimiro, D. R., Davies, M. E., Evans, R. K., Zhang,  
649 Z. Q., Simon, A. J., Triglia, W. L. *et al.* 2002 Replication-incompetent adenoviral vaccine  
650 vector elicits effective anti-immunodeficiency-virus immunity. *Nature*, **415**(6869), 331–5.
- 651 8. Watkins, D. I., Burton, D. R., Kallas, E. G., Moore, J. P. & Koff, W. C. 2008 Nonhuman  
652 primate models and the failure of the Merck HIV-1 vaccine in humans. *Nat Med*, **14**(6),  
653 617–21.
- 654 9. Watkins, D. I. 2008 The hope for an HIV vaccine based on induction of CD8+ T lymphocytes–  
655 a review. *Mem Inst Oswaldo Cruz*, **103**(2), 119–29.
- 656 10. Haynes, B. F., Shaw, G. M., Korber, B., Kelsoe, G., Sodroski, J., Hahn, B. H., Borrow, P.  
657 & McMichael, A. J. 2016 Hiv-host interactions: Implications for vaccine design. *Cell host &*  
658 *microbe*, **19**, 292–303. doi:10.1016/j.chom.2016.02.002.
- 659 11. Mascola, J. R. & Haynes, B. F. 2013 HIV-1 neutralizing antibodies: understanding nature's  
660 pathways. *Immunol Rev*, **254**(1), 225–244. doi:10.1111/imr.12075.
- 661 12. Barouch, D. H. & Picker, L. J. 2014 Novel vaccine vectors for HIV-1. *Nat Rev Microbiol*,  
662 **12**(11), 765–771. doi:10.1038/nrmicro3360.

- 663 13. Haynes, B. F. 2015 New approaches to HIV vaccine development. *Curr Opin Immunol*, **35**,  
664 39–47. doi:10.1016/j.coi.2015.05.007.
- 665 14. Sadanand, S., Suscovich, T. J. & Alter, G. 2016 Broadly Neutralizing Antibodies Against  
666 HIV: New Insights to Inform Vaccine Design. *Annu Rev Med*, **67**, 185–200. doi:  
667 10.1146/annurev-med-091014-090749.
- 668 15. Makedonas, G. & Betts, M. R. 2011 Living in a house of cards: re-evaluating CD8+ T-  
669 cell immune correlates against HIV. *Immunol Rev*, **239**(1), 109–124. doi:10.1111/j.1600-  
670 065X.2010.00968.x.
- 671 16. McMichael, A. J., Borrow, P., Tomaras, G. D., Goonetilleke, N. & Haynes, B. F. 2010 The  
672 immune response during acute HIV-1 infection: clues for vaccine development. *Nat. Rev.*  
673 *Immunol.*, **10**(1), 11–23.
- 674 17. Hersperger, A. R., Migueles, S. A., Betts, M. R. & Connors, M. 2011 Qualitative features  
675 of the HIV-specific CD8+ T-cell response associated with immunologic control. *Curr Opin*  
676 *HIV AIDS*, **6**(3), 169–173. doi:10.1097/COH.0b013e3283454c39.
- 677 18. Demers, K. R., Reuter, M. A. & Betts, M. R. 2013 CD8(+) T-cell effector function and  
678 transcriptional regulation during HIV pathogenesis. *Immunol Rev*, **254**(1), 190–206. doi:  
679 10.1111/imr.12069.
- 680 19. Borrow, P., Lewicki, H., Hahn, B. H., Shaw, G. M. & Oldstone, M. B. 1994 Virus-specific  
681 CD8+ cytotoxic T-lymphocyte activity associated with control of viremia in primary human  
682 immunodeficiency virus type 1 infection. *J. Virol.*, **68**, 6103–6110.
- 683 20. Koup, R. A., Safrit, J. T., Cao, Y., Andrews, C. A., McLeod, G., Borkowsky, W., Farthing,  
684 C. & Ho, D. D. 1994 Temporal association of cellular immune responses with the initial  
685 control of viremia in primary human immunodeficiency virus type 1 syndrome. *J. Virol.*, **68**,  
686 4650–4655.
- 687 21. Abdel-Motal, U. M., Gillis, J., Manson, K., Wyand, M., Montefiori, D., Stefano-Cole, K.,  
688 Montelaro, R. C., Altman, J. D. & Johnson, R. P. 2005 Kinetics of expansion of SIV Gag-  
689 specific CD8+ T lymphocytes following challenge of vaccinated macaques. *Virology*, **333**,  
690 226–238.
- 691 22. Newberg, M. H., McEvers, K. J., Gorgone, D. A., Lifton, M. A., Baumeister, S. H., Veazey,  
692 R. S., Schmitz, J. E. & Letvin, N. L. 2006 Immunodomination in the evolution of dominant  
693 epitope-specific CD8+ T lymphocyte responses in simian immunodeficiency virus-infected  
694 rhesus monkeys. *J. Immunol.*, **176**, 319–328.
- 695 23. Carrington, M., Nelson, G. W., Martin, M. P., Kissner, T., Vlahov, D., Goedert, J. J.,  
696 Kaslow, R., Buchbinder, S., Hoots, K. *et al.* 1999 HLA and HIV-1: heterozygote advantage  
697 and B\*35-Cw\*04 disadvantage. *Science*, **283**(5408), 1748–52.
- 698 24. Carrington, M. & O’Brien, S. 2003 The influence of HLA genotype on AIDS. *Annu Rev Med*,  
699 **54**, 535–51.
- 700 25. McLaren, P. J. & Carrington, M. 2015 The impact of host genetic variation on infection with  
701 HIV-1. *Nat Immunol*, **16**(6), 577–583. doi:10.1038/ni.3147.

- 702 26. Goulder, P. & Watkins, D. 2004 HIV and SIV CTL escape: implications for vaccine design.  
703 *Nat Rev Immunol*, **4**(8), 630–40.
- 704 27. Ogg, G. S., Jin, X., Bonhoeffer, S., Dunbar, P. R., Nowak, M. A., Monard, S., Segal, J. P.,  
705 Cao, Y., Rowland-Jones, S. L. *et al.* 1998 Quantitation of HIV-1-specific cytotoxic T lym-  
706 phocytes and plasma load of viral RNA. *Science*, **279**(5359), 2103–6.
- 707 28. Kalams, S. A., Buchbinder, S. P., Rosenberg, E. S., Billingsley, J. M., Colbert, D. S., Jones,  
708 N. G., Shea, A. K., Trocha, A. K. & Walker, B. D. 1999 Association between virus-specific  
709 cytotoxic T-lymphocyte and helper responses in human immunodeficiency virus type 1 in-  
710 fection. *J Virol*, **73**(8), 6715–6720.
- 711 29. Betts, M., Ambrozak, D., Douek, D., Bonhoeffer, S., Brenchley, J., Casazza, J., Koup, R.  
712 & Picker, L. 2001 Analysis of total human immunodeficiency virus (HIV)-specific CD4(+)  
713 and CD8(+) T-cell responses: relationship to viral load in untreated HIV infection. *J Virol*,  
714 **75**(24), 11 983–91.
- 715 30. Novitsky, V., Gilbert, P., Peter, T., McLane, M. F., Gaolekwe, S., Rybak, N., Thior, I.,  
716 Ndung'u, T., Marlink, R. *et al.* 2003 Association between Virus-Specific T-Cell Responses  
717 and Plasma Viral Load in Human Immunodeficiency Virus Type 1 Subtype C Infection. *J*  
718 *Virol*, **77**(2), 882–90.
- 719 31. Day, C. L., Kiepiela, P., Leslie, A. J., van der Stok, M., Nair, K., Ismail, N., Honeyborne,  
720 I., Crawford, H., Coovadia, H. M. *et al.* 2007 Proliferative capacity of epitope-specific CD8  
721 T-cell responses is inversely related to viral load in chronic human immunodeficiency virus  
722 type 1 infection. *J Virol*, **81**(1), 434–8.
- 723 32. Gray, C. M., Mlotshwa, M., Riou, C., Mathebula, T., de Assis Rosa, D., Mashishi, T.,  
724 Seoighe, C., Ngandu, N., van Loggerenberg, F. *et al.* 2009 Human immunodeficiency virus-  
725 specific gamma interferon enzyme-linked immunospot assay responses targeting specific re-  
726 gions of the proteome during primary subtype C infection are poor predictors of the course  
727 of viremia and set point. *J Virol*, **83**(1), 470–8.
- 728 33. Kiepiela, P., Ngumbela, K., Thobakgale, C., Ramduth, D., Honeyborne, I., Moodley, E.,  
729 Reddy, S., de Pierres, C., Mncube, Z. *et al.* 2007 CD8+ T-cell responses to different HIV  
730 proteins have discordant associations with viral load. *Nat. Med.*, **13**(1), 46–53.
- 731 34. Geldmacher, C., Currier, J. R., Herrmann, E., Haule, A., Kuta, E., McCutchan, F., Njovu,  
732 L., Geis, S., Hoffmann, O. *et al.* 2007 CD8 T-cell recognition of multiple epitopes within  
733 specific Gag regions is associated with maintenance of a low steady-state viremia in hu-  
734 man immunodeficiency virus type 1-seropositive patients. *J Virol*, **81**(5), 2440–2448. doi:  
735 10.1128/JVI.01847-06.
- 736 35. Rolland, M., Heckerman, D., Deng, W., Rousseau, C. M., Coovadia, H., Bishop, K.,  
737 Goulder, P. J. R., Walker, B. D., Brander, C. *et al.* 2008 Broad and Gag-biased HIV-1  
738 epitope repertoires are associated with lower viral loads. *PLoS One*, **3**(1), e1424. doi:  
739 10.1371/journal.pone.0001424.
- 740 36. Brennan, C. A., Ibarondo, F. J., Sugar, C. A., Hausner, M. A., Shih, R., Ng, H. L., De-  
741 tels, R., Margolick, J. B., Rinaldo, C. R. *et al.* 2012 Early HLA-B\*57-restricted CD8+ T



- 742 lymphocyte responses predict HIV-1 disease progression. *J Virol*, **86**(19), 10 505–10 516.  
743 doi:10.1128/JVI.00102-12.
- 744 37. Jin, X., Bauer, D. E., Tuttleton, S. E., Lewin, S., Gettie, A., Blanchard, J., Irwin, C. E.,  
745 Safrit, J. T., Mittler, J. *et al.* 1999 Dramatic rise in plasma viremia after CD8(+) T cell  
746 depletion in simian immunodeficiency virus-infected macaques. *J Exp Med*, **189**(6), 991–8.
- 747 38. Schmitz, J. E., Kuroda, M. J., Santra, S., Sasseville, V. G., Simon, M. A., Lifton, M. A.,  
748 Racz, P., Tenner-Racz, K., Dalesandro, M. *et al.* 1999 Control of viremia in simian immun-  
749 odeficiency virus infection by CD8+ lymphocytes. *Science*, **283**, 857–860.
- 750 39. Klatt, N. R., Shudo, E., Ortiz, A. M., Engram, J. C., Paiardini, M., Lawson, B., Miller, M. D.,  
751 Else, J., Pandrea, I. *et al.* 2010 CD8+ lymphocytes control viral replication in SIVmac239-  
752 infected rhesus macaques without decreasing the lifespan of productively infected cells. *PLoS*  
753 *Pathog*, **6**(1), e1000 747.
- 754 40. Wong, J. K., Strain, M. C., Porrata, R., Reay, E., Sankaran-Walters, S., Ignacio, C. C.,  
755 Russell, T., Pillai, S. K., Looney, D. J. *et al.* 2010 In vivo CD8+ T-cell suppression of SIV  
756 viremia is not mediated by CTL clearance of productively infected cells. *PLoS Pathog*, **6**(1),  
757 e1000 748.
- 758 41. Hansen, S. G., Ford, J. C., Lewis, M. S., Ventura, A. B., Hughes, C. M., Coyne-Johnson,  
759 L., Whizin, N., Oswald, K., Shoemaker, R. *et al.* 2011 Profound early control of highly  
760 pathogenic SIV by an effector memory T-cell vaccine. *Nature*, **473**(7348), 523–527. doi:  
761 10.1038/nature10003.
- 762 42. Stephenson, K. E., Li, H., Walker, B. D., Michael, N. L. & Barouch, D. H. 2012 Gag-specific  
763 cellular immunity determines in vitro viral inhibition and in vivo virologic control following  
764 simian immunodeficiency virus challenges of vaccinated rhesus monkeys. *J Virol*, **86**(18),  
765 9583–9589. doi:10.1128/JVI.00996-12.
- 766 43. Hansen, S. G., Piatak, M., Ventura, A. B., Hughes, C. M., Gilbride, R. M., Ford, J. C.,  
767 Oswald, K., Shoemaker, R., Li, Y. *et al.* 2013 Immune clearance of highly pathogenic SIV  
768 infection. *Nature*, **502**(7469), 100–104. doi:10.1038/nature12519.
- 769 44. Iwamoto, N., Takahashi, N., Seki, S., Nomura, T., Yamamoto, H., Inoue, M., Shu, T., Naruse,  
770 T. K., Kimura, A. *et al.* 2014 Control of simian immunodeficiency virus replication by vaccine-  
771 induced Gag- and Vif-specific CD8+ T cells. *J Virol*, **88**(1), 425–433. doi:10.1128/JVI.02634-  
772 13.
- 773 45. Cohen, M. S., Shaw, G. M., McMichael, A. J. & Haynes, B. F. 2011 Acute HIV-1 Infection.  
774 *N Engl J Med*, **364**(20), 1943–1954. doi:10.1056/NEJMra1011874.
- 775 46. Migueles, S. A. & Connors, M. 2015 Success and failure of the cellular immune response  
776 against HIV-1. *Nat Immunol*, **16**(6), 563–570. doi:10.1038/ni.3161.
- 777 47. Migueles, S., Laborico, A., Shupert, W., Sabbaghian, M., Rabin, R., Hallahan, C.,  
778 Van Baarle, D., Kostense, S., Miedema, F. *et al.* 2002 HIV-specific CD8+ T cell prolifer-  
779 ation is coupled to perforin expression and is maintained in nonprogressors. *Nat Immunol*,  
780 **3**(11), 1061–8.

- 781 48. Walker, B. D. 2007 Elite control of HIV Infection: implications for vaccines and treatment.  
782 *Top HIV Med*, **15**(4), 134–136.
- 783 49. Lobritz, M. A., Lassen, K. G. & Arts, E. J. 2011 HIV-1 replicative fitness in elite controllers.  
784 *Curr Opin HIV AIDS*, **6**(3), 214–220. doi:10.1097/COH.0b013e3283454cf5.
- 785 50. Zaunders, J., Dyer, W. B. & Churchill, M. 2011 The Sydney Blood Bank Cohort: implications  
786 for viral fitness as a cause of elite control. *Curr Opin HIV AIDS*, **6**(3), 151–156. doi:  
787 10.1097/COH.0b013e3283454d5b.
- 788 51. Poropatich, K. & Sullivan, D. J. 2011 Human immunodeficiency virus type 1 long-term non-  
789 progressors: the viral, genetic and immunological basis for disease non-progression. *J Gen*  
790 *Viro*, **92**(Pt 2), 247–268. doi:10.1099/vir.0.027102-0.
- 791 52. Goulder, P. J. & Walker, B. D. 2012 HIV and HLA class I: an evolving relationship. *Immunity*,  
792 **37**(3), 426–440.
- 793 53. Kløverpris, H. N., Leslie, A. & Goulder, P. 2015 ROLE OF HLA ADAPTATION IN HIV  
794 EVOLUTION. *Frontiers in Immunology*, **6**, 665.
- 795 54. Goonetilleke, N., Liu, M. K., Salazar-Gonzalez, J. F., Ferrari, G., Giorgi, E., Ganusov,  
796 V. V., Keele, B. F., Learn, G. H., Turnbull, E. L. *et al.* 2009 The first T cell response to  
797 transmitted/founder virus contributes to the control of acute viremia in HIV-1 infection. *J*  
798 *Exp Med*, **206**(6), 1253–72.
- 799 55. Turnbull, E. L., Wong, M., Wang, S., Wei, X., Jones, N. A., Conrod, K. E., Aldam, D.,  
800 Turner, J., Pellegrino, P. *et al.* 2009 Kinetics of expansion of epitope-specific T cell responses  
801 during primary HIV-1 infection. *J. Immunol.*, **182**, 7131–7145.
- 802 56. Liu, M. K. P., Hawkins, N., Ritchie, A. J., Ganusov, V. V., Whale, V., Brackenridge, S.,  
803 Li, H., Pavlicek, J. W., Cai, F. *et al.* 2013 Vertical T cell immunodominance and epitope  
804 entropy determine HIV-1 escape. *J Clin Invest*, **123**(1), 380–393. doi:10.1172/JCI65330.
- 805 57. Riou, C., Ganusov, V. V., Champion, S., Mlotshwa, M., Liu, M. K. P., Whale, V. E.,  
806 Goonetilleke, N., Borrow, P., Ferrari, G. *et al.* 2012 Distinct kinetics of Gag-specific CD4(+)  
807 and CD8(+) T cell responses during acute HIV-1 infection. *J Immunol*, **188**(5), 2198–2206.  
808 doi:10.4049/jimmunol.1102813.
- 809 58. Yue, L., Pfafferott, K. J., Baalwa, J., Conrod, K., Dong, C. C., Chui, C., Rong, R., Claiborne,  
810 D. T., Prince, J. L. *et al.* 2015 Transmitted virus fitness and host T cell responses collectively  
811 define divergent infection outcomes in two HIV-1 recipients. *PLoS Pathog*, **11**(1), e1004565.  
812 doi:10.1371/journal.ppat.1004565.
- 813 59. Ndhlovu, Z. M., Kanya, P., Mewalal, N., Klaverpris, H. N., Nkosi, T., Pretorius, K., Laher,  
814 F., Ogunshola, F., Chopera, D. *et al.* 2015 Magnitude and Kinetics of CD8(+) T Cell Acti-  
815 vation during Hyperacute HIV Infection Impact Viral Set Point. *Immunity*, **43**(3), 591–604.  
816 doi:10.1016/j.immuni.2015.08.012.
- 817 60. Miller, J., van der Most, R., Akondy, R., Glidewell, J., Albott, S., Masopust, D., Murali-  
818 Krishna, K., Mahar, P., Edupuganti, S. *et al.* 2008 Human effector and memory CD8+ T  
819 cell responses to smallpox and yellow fever vaccines. *Immunity*, **28**(5), 710–22.

- 820 61. Le, D., Miller, J. D. & Ganusov, V. V. 2015 Mathematical modeling provides kinetic details  
821 of the human immune response to vaccination. *Front Cell Infect Microbiol*, **4**, 177. doi:  
822 10.3389/fcimb.2014.00177.
- 823 62. Davenport, M. P., Ribeiro, R. M., Chao, D. L. & Perelson, A. S. 2004 Predicting the impact  
824 of a nonsterilizing vaccine against human immunodeficiency virus. *J. Virol.*, **78**(20), 11 340–  
825 11 351.
- 826 63. Davenport, M. P., Ribeiro, R. M. & Perelson, A. S. 2004 Kinetics of virus-specific CD8+ T  
827 cells and the control of human immunodeficiency virus infection. *J. Virol.*, **78**(18), 10 096–  
828 10 103.
- 829 64. Althaus, C. L. & De Boer, R. J. 2008 Dynamics of immune escape during HIV/SIV infection.  
830 *PLoS Comput. Biol.*, **4**(7).
- 831 65. Asquith, B., Edwards, C., Lipsitch, M. & McLean, A. 2006 Inefficient cytotoxic T  
832 lymphocyte-mediated killing of HIV-1-infected cells in vivo. *PLoS Biology*, **4**, e90.
- 833 66. De Boer, R. J. 2007 Understanding the failure of CD8+ T-cell vaccination against  
834 simian/human immunodeficiency virus. *J. Virol.*, **81**(6), 2838–2848.
- 835 67. Ganusov, V. V. & De Boer, R. J. 2006 Estimating Costs and Benefits of CTL Escape Muta-  
836 tions in SIV/HIV Infection. *PLoS Comput. Biol.*, **2**(3), e24.
- 837 68. Nowak, M. A. & Bangham, C. R. M. 1996 Population dynamics of immune responses to  
838 persistent viruses. *Science*, **272**, 74–79.
- 839 69. Nowak, M. A., Maya, R. M. & Sigmund, K. 1995 Immune responses against multiple epitopes.  
840 *J. Theor. Biol.*, **175**, 325–353.
- 841 70. Martyushev, A. P., Petravic, J., Grimm, A. J., Alinejad-Rokny, H., Gooneratne, S. L., Reece,  
842 J. C., Cromer, D., Kent, S. J. & Davenport, M. P. 2015 Epitope-specific CD8+ T cell kinetics  
843 rather than viral variability determine the timing of immune escape in simian immunodeficiency  
844 virus infection. *J Immunol*, **194**(9), 4112–4121. doi:10.4049/jimmunol.1400793.
- 845 71. van Deutekom, H. W., Wijnker, G. & de Boer, R. J. 2013 The rate of immune escape vanishes  
846 when multiple immune responses control an HIV infection. *The Journal of Immunology*,  
847 **191**(6), 3277–3286.
- 848 72. van der Most, R. G., Concepcion, R. J., Oseroff, C., Alexander, J., Southwood, S., Sidney,  
849 J., Chesnut, R. W., Ahmed, R. & Sette, A. 1997 Uncovering subdominant cytotoxic T-  
850 lymphocyte responses in lymphocytic choriomeningitis virus-infected BALB/c mice. *J Virol*,  
851 **71**(7), 5110–4.
- 852 73. Vijh, S., Pilip, I. & Pamer, E. 1999 Noncompetitive Expansion of Cytotoxic T Lymphocytes  
853 Specific for Different Antigens during Bacterial Infection. *Infection Immunity*, **67**, 1303–1309.
- 854 74. Kedl, R. M., Rees, W. A., Hildeman, D. A., Schaefer, B., Mitchell, T., Kappler, J. & Murrack,  
855 P. 2000 T cells compete for access to antigen-bearing antigen-presenting cells. *J. Exp. Med.*,  
856 **192**, 1105–1113.

- 857 75. Grayson, J. M., Harrington, L. E., Lanier, J. G., Wherry, E. J. & Ahmed, R. 2002 Differential  
858 sensitivity of naive and memory CD8(+) T cells to apoptosis in vivo. *J Immunol*, **169**(7),  
859 3760–70.
- 860 76. Brehm, M., Pinto, A., Daniels, K., Schneck, J., Welsh, R. & Selin, L. 2002 T cell immun-  
861 odominance and maintenance of memory regulated by unexpectedly cross-reactive pathogens.  
862 *Nat Immunol*, **3**(7), 627–34.
- 863 77. Kedl, R. M., Kappler, J. W. & Murrack, P. 2003 Epitope dominance, competition and T cell  
864 affinity maturation. *Curr. Opin. Immunol.*, **15**, 120–127.
- 865 78. Andreansky, S. S., Stambas, J., Thomas, P. G., Xie, W., Webby, R. J. & Doherty, P. C.  
866 2005 Consequences of immunodominant epitope deletion for minor influenza virus-specific  
867 CD8+-T-cell responses. *J Virol*, **79**(7), 4329–4339. doi:10.1128/JVI.79.7.4329-4339.2005.
- 868 79. D'Souza, W. & Hedrick, S. 2006 Cutting edge: latecomer CD8 T cells are imprinted with a  
869 unique differentiation program. *J Immunol*, **177**(2), 777–81.
- 870 80. Badovinac, V., Haring, J. & Harty, J. 2007 Initial T cell receptor transgenic cell precursor  
871 frequency dictates critical aspects of the CD8(+) T cell response to infection. *Immunity*,  
872 **26**(6), 827–41.
- 873 81. Gruta, N. L. L., Rothwell, W. T., Cukalac, T., Swan, N. G., Valkenburg, S. A., Kedzierska,  
874 K., Thomas, P. G., Doherty, P. C. & Turner, S. J. 2010 Primary CTL response magnitude in  
875 mice is determined by the extent of naive T cell recruitment and subsequent clonal expansion.  
876 *J Clin Invest*, **120**(6), 1885–1894. doi:10.1172/JCI41538.
- 877 82. Farrington, L. A., Smith, T. A., Grey, F., Hill, A. B. & Snyder, C. M. 2013 Competition  
878 for antigen at the level of the APC is a major determinant of immunodominance during  
879 memory inflation in murine cytomegalovirus infection. *The Journal of Immunology*, **190**(7),  
880 3410–3416.
- 881 83. Fryer, H. R., Scherer, A., Oxenius, A., Phillips, R. & McLean, A. R. 2009 No evidence for  
882 competition between cytotoxic T-lymphocyte responses in HIV-1 infection. *Proc. Biol. Sci.*,  
883 **276**, 4389–4397.
- 884 84. Robb, M. L., Eller, L. A., Kibuuka, H., Rono, K., Maganga, L., Nitayaphan, S., Kroon, E.,  
885 Sawe, F. K., Sinei, S. *et al.* 2016 Prospective Study of Acute HIV-1 Infection in Adults in  
886 East Africa and Thailand. *N Engl J Med*, **374**(22), 2120–2130. doi:10.1056/NEJMoa1508952.
- 887 85. Jones, N. A., Wei, X., Flower, D. R., Wong, M., Michor, F., Saag, M. S., Hahn, B. H.,  
888 Nowak, M. A., Shaw, G. M. *et al.* 2004 Determinants of human immunodeficiency virus type  
889 1 escape from the primary CD8+ cytotoxic T lymphocyte response. *J Exp Med*, **200**(10),  
890 1243–56.
- 891 86. De Boer, R. J., Oprea, M., Antia, R., Murali-Krishna, K., Ahmed, R. & Perelson, A. S. 2001  
892 Recruitment times, proliferation, and apoptosis rates during the CD8(+) T-cell response to  
893 lymphocytic choriomeningitis virus. *J. Virol.*, **75**, 10663–10669.
- 894 87. Jenkins, M. K. & Moon, J. J. 2012 The role of naive T cell precursor frequency and recruit-  
895 ment in dictating immune response magnitude. *J. Immunol.*, **188**(9), 4135–4140.

- 896 88. De Boer, R. J., Homann, D. & Perelson, A. S. 2003 Different dynamics of CD4+ and CD8+  
897 T cell responses during and after acute lymphocytic choriomeningitis virus infection. *J.*  
898 *Immunol.*, **171**, 3928–3935.
- 899 89. Barton, J. P., Goonetilleke, N., Butler, T. C., Walker, B. D., McMichael, A. J. & Chakraborty,  
900 A. K. 2016 Relative rate and location of intra-host HIV evolution to evade cellular immunity  
901 are predictable. *Nat Commun*, **7**, 11 660. doi:10.1038/ncomms11660.
- 902 90. Bodine, E., Lenhart, S. & Gross, L. 2014 *Mathematics for the Life Sciences*. Princeton  
903 University Press.
- 904 91. Radebe, M., Gounder, K., Mokgoro, M., Ndhlovu, Z. M., Mncube, Z., Mkhize, L., van der  
905 Stok, M., Jaggernath, M., Walker, B. D. *et al.* 2015 Broad and persistent Gag-specific CD8+  
906 T-cell responses are associated with viral control but rarely drive viral escape during primary  
907 HIV-1 infection. *AIDS*, **29**(1), 23–33. doi:10.1097/QAD.0000000000000508.
- 908 92. Radebe, M., Nair, K., Chonco, F., Bishop, K., Wright, J. K., van der Stok, M., Bassett, I. V.,  
909 Mncube, Z., Altfeld, M. *et al.* 2011 Limited immunogenicity of HIV CD8+ T-cell epitopes in  
910 acute Clade C virus infection. *J Infect Dis*, **204**(5), 768–776. doi:10.1093/infdis/jir394.
- 911 93. Ganusov, V. V., Goonetilleke, N., Liu, M. K., Ferrari, G., Shaw, G. M., McMichael, A. J.,  
912 Borrow, P., Korber, B. T. & Perelson, A. S. 2011 Fitness costs and diversity of the cytotoxic  
913 T lymphocyte (CTL) response determine the rate of CTL escape during acute and chronic  
914 phases of HIV infection. *J. Virol.*, **85**(20), 10 518–10 528.
- 915 94. Ganusov, V. V., Barber, D. L. & De Boer, R. J. 2011 Killing of targets by CD8 T cells in  
916 the mouse spleen follows the law of mass action. *PLoS One*, **6**(1), e15 959.
- 917 95. Mellors, J. W., Munoz, A., Giorgi, J. V., Margolick, J. B., Tassoni, C. J., Gupta, P., Kingsley,  
918 L. A., Todd, J. A., Saah, A. J. *et al.* 1997 Plasma viral load and CD4+ lymphocytes as  
919 prognostic markers of HIV-1 infection. *Ann. Intern. Med.*, **126**, 946–954.
- 920 96. Mothe, B., Llano, A., Ibarondo, J., Daniels, M., Miranda, C., Zamarreo, J., Bach, V.,  
921 Zuniga, R., Prez-Ivarez, S. *et al.* 2011 Definition of the viral targets of protective hiv-1-specific  
922 t cell responses. *Journal of translational medicine*, **9**, 208. doi:10.1186/1479-5876-9-208.
- 923 97. Geldmacher, C., Gray, C., Nason, M., Currier, J. R., Haule, A., Njovu, L., Geis, S., Hoffmann,  
924 O., Maboko, L. *et al.* 2007 A high viral burden predicts the loss of CD8 T-cell responses spe-  
925 cific for subdominant gag epitopes during chronic human immunodeficiency virus infection.  
926 *J Virol*, **81**(24), 13 809–13 815. doi:10.1128/JVI.01566-07.
- 927 98. Ribeiro, R. M., Qin, L., Chavez, L. L., Li, D., Self, S. G. & Perelson, A. S. 2010 Estimation  
928 of the initial viral growth rate and basic reproductive number during acute HIV-1 infection.  
929 *J Virol*, **84**(12), 6096–102.
- 930 99. Alanio, C., Lemaitre, F., Law, H. K., Hasan, M. & Albert, M. L. 2010 Enumeration of human  
931 antigen-specific naive CD8+ T cells reveals conserved precursor frequencies. *Blood*, **115**(18),  
932 3718–3725.

- 933 100. Murali-Krishna, K., Altman, J., Suresh, M., Sourdive, D., Zajac, A., Miller, J., Slansky, J.  
934 & Ahmed, R. 1998 Counting antigen-specific CD8+ T cells: A re-evaluation of bystander  
935 actiation during viral infection. *Immunity*, **8**, 177–187.
- 936 101. Homann, D., Teyton, L. & Oldstone, M. 2001 Differential regulation of antiviral T-cell im-  
937 munity results in stable CD8+ but declining CD4+ T-cell memory. *Nat Med*, **7**(8), 913–919.
- 938 102. Obar, J. J., Khanna, K. M. & Lefrancois, L. 2008 Endogenous naive CD8+ T cell precursor  
939 frequency regulates primary and memory responses to infection. *Immunity*, **28**(6), 859–69.
- 940 103. Akondy, R. S., Johnson, P. L. F., Nakaya, H. I., Edupuganti, S., Mulligan, M. J., Lawson, B.,  
941 Miller, J. D., Pulendran, B., Antia, R. *et al.* 2015 Initial viral load determines the magnitude  
942 of the human CD8 T cell response to yellow fever vaccination. *Proc Natl Acad Sci U S A*,  
943 **112**(10), 3050–3055. doi:10.1073/pnas.1500475112.
- 944 104. Sergeev, R. A., Batorsky, R. E. & Rouzine, I. M. 2010 Model with two types of CTL regulation  
945 and experiments on CTL dynamics. *J. Theor. Biol.*, **263**(3), 369–384.
- 946 105. Kemp, R. A., Powell, T. J., Dwyer, D. W. & Dutton, R. W. 2004 Cutting edge: regulation  
947 of CD8+ T cell effector population size. *J. Immunol.*, **173**(5), 2923–2927.
- 948 106. Badovinac, V. P. & Harty, J. T. 2007 Manipulating the rate of memory CD8+ T cell gener-  
949 ation after acute infection. *J. Immunol.*, **179**(1), 53–63.
- 950 107. Bocharov, G., Ludewig, B., Bertoletti, A., Klenerman, P., Junt, T., Krebs, P., Luzyanina,  
951 T., Fraser, C. & Anderson, R. M. 2004 Underwhelming the immune response: effect of slow  
952 virus growth on CD8+-T-lymphocyte responses. *J. Virol.*, **78**(5), 2247–2254.
- 953 108. Davenport, M. P., Belz, G. T. & Ribeiro, R. M. 2009 The race between infection and immu-  
954 nity: how do pathogens set the pace? *Trends Immunol.*, **30**(2), 61–66.
- 955 109. Kastenmuller, W., Gasteiger, G., Gronau, J. H., Baier, R., Ljapoci, R., Busch, D. H. &  
956 Drexler, I. 2007 Cross-competition of CD8+ T cells shapes the immunodominance hierarchy  
957 during boost vaccination. *J Exp Med*, **204**(9), 2187–2198. doi:10.1084/jem.20070489.
- 958 110. Smith, A. L., Wikstrom, M. E. & Fazekas de St Groth, B. 2000 Visualizing T cell competi-  
959 tion for peptide/MHC complexes: a specific mechanism to minimize the effect of precursor  
960 frequency. *Immunity*, **13**, 783–794.
- 961 111. Probst, H. C., Dumrese, T. & van den Broek, M. F. 2002 Cutting edge: competition for APC  
962 by CTLs of different specificities is not functionally important during induction of antiviral  
963 responses. *J. Immunol.*, **168**, 53875391.
- 964 112. Owen, R. E., Heitman, J. W., Hirschhorn, D. F., Lanteri, M. C., Biswas, H. H., Martin,  
965 J. N., Krone, M. R., Deeks, S. G., Norris, P. J. *et al.* 2010 HIV+ elite controllers have low  
966 HIV-specific T-cell activation yet maintain strong, polyfunctional T-cell responses. *AIDS*,  
967 **24**(8), 1095–1105.
- 968 113. Halsey, L. G., Curran-Everett, D., Vowler, S. L. & Drummond, G. B. 2015 The fickle P value  
969 generates irreproducible results. *Nat Methods*, **12**(3), 179–185. doi:10.1038/nmeth.3288.

- 970 114. Martin, G. E., Gossez, M., Williams, J. P., Sthr, W., Meyerowitz, J., Leitman, E. M.,  
971 Goulder, P., Porter, K., Fidler, S. *et al.* 2017 Post-treatment control or treated controllers?  
972 viral remission in treated and untreated primary HIV infection. *AIDS (London, England)*,  
973 **31**, 477–484. doi:10.1097/QAD.0000000000001382.
- 974 115. Lanzavecchia, A. 2002 Lack of fair play in the T cell response. *Nat. Immunol.*, **3**, 9–10.
- 975 116. Tilman, D. 1982 *Resource competition and community structure*. Princeton University Press,  
976 NJ.
- 977 117. Amanna, I. J., Carlson, N. E. & Slifka, M. K. 2007 Duration of humoral immunity to common  
978 viral and vaccine antigens. *N Engl J Med*, **357**(19), 1903–1915. doi:10.1056/NEJMoa066092.
- 979 118. Althaus, C. L., Ganusov, V. V. & De Boer, R. J. 2007 Dynamics of CD8+ T cell responses  
980 during acute and chronic lymphocytic choriomeningitis virus infection. *J Immunol*, **179**(5),  
981 2944–2951.
- 982 119. Fiebig, E. W., Wright, D. J., Rawal, B. D., Garrett, P. E., Schumacher, R. T., Peddada, L.,  
983 Heldebrant, C., Smith, R., Conrad, A. *et al.* 2003 Dynamics of HIV viremia and antibody  
984 seroconversion in plasma donors: implications for diagnosis and staging of primary HIV  
985 infection. *AIDS*, **17**(13), 1871–1879. doi:10.1097/01.aids.0000076308.76477.b8.
- 986 120. Giorgi, E. E., Funkhouser, B., Athreya, G., Perelson, A. S., Korber, B. T. & Bhattacharya,  
987 T. 2010 Estimating time since infection in early homogeneous HIV-1 samples using a poisson  
988 model. *BMC Bioinformatics*, **11**, 532. doi:10.1186/1471-2105-11-532.
- 989 121. McMichael, A. J. & Haynes, B. F. 2012 Lessons learned from HIV-1 vaccine trials: new  
990 priorities and directions. *Nat. Immunol.*, **13**(5), 423–427.

## 991 List of Figures

- 992 1 Schematic representation of the  $T_{\text{on}}/T_{\text{off}}$  mathematical model fitted to the epitope-  
993 specific CD8<sup>+</sup> T-cell response kinetics data [86]. In this model,  $E_0$  epitope-specific  
994 naive CD8<sup>+</sup> T cells become activated at time  $t = T_{\text{on}}$  and start proliferating at rate  
995  $\rho$ . At  $t = T_{\text{off}}$ , T cell response peaks and declines at rate  $\alpha$ . We refer to  $E_0$  as  
996 the predicted initial frequency of epitope-specific CD8<sup>+</sup> T cells [87]. Evidently,  $E_0$   
997 may over- or under-estimate the response precursor frequency depending on exactly  
998 when the T cells became activated and how adequate the mathematical model is  
999 for describing immune response data during the expansion phase. . . . . 3
- 1000 2 Most HIV proteins were recognized by CD8<sup>+</sup> T cell responses. We calculated the  
1001 frequency at which HIV proteins were recognized by CD8<sup>+</sup> T cells; overall, 50%  
1002 of responses were directed against Env or Gag (A).  $m = 8$  CD8<sup>+</sup> T cell responses  
1003 were detected in this cohort of 22 patients at any given time point after infection  
1004 (B). In B (and other figures in the paper),  $\mu$  denotes the average,  $m$  is the median,  
1005 and  $\sigma$  is the standard deviation. The distributions are shown for the first 100 days  
1006 after symptom onset but, overall, distributions changed little over the course of 400  
1007 days of infection (results not shown). Patient SUMA0874 was excluded from the  
1008 analysis in B due to a lack of measurements of all T cell responses at all time points. 6
- 1009 3 Modest yet statistically significant increase in the average normalized T-cell re-  
1010 sponse breadth over the course of the first year of HIV infection. We divided the  
1011 observations into different time bins (A, 50-day intervals; B, 100-day intervals) and  
1012 calculated the relative breadth for the corresponding interval. The relative breadth  
1013 was calculated as the number of HIV-specific CD8<sup>+</sup> T-cell responses detected in  
1014 a given time period divided by the number of all responses measured for that pa-  
1015 tient in all time periods; data were averaged to simplify presentation. Averaging  
1016 did not influence the statistical significance of conclusions (not shown). Colors and  
1017 symbols represent the data from different patients as shown in Fig. S5 in Supple-  
1018 mentary Material. Black horizontal bars denote the mean relative breadth for that  
1019 time interval for all patients. There was a statistically significant increase in relative  
1020 breadth (Spearman's rank correlation coefficient  $\rho$  and  $p$  values indicated on pan-  
1021 els). There was no change in the average total immune response in all patients (Fig.  
1022 S6). Detailed analysis of the relative number of CD8<sup>+</sup> T-cell responses in individual  
1023 patients revealed variable patterns: constant breadth, increasing breadth, decreas-  
1024 ing breadth, and breadth changing non-monotonically over time (Fig. S7). Also, no  
1025 overall change in the average breadth (un-normalized) was observed (Fig. S5). We  
1026 observed a similarly modest but significant increase in  $SE$  and  $EI$  of HIV-specific  
1027 CD8<sup>+</sup> T-cell response with time (Fig. S8). . . . . 7



1028 4 Breadth of HIV-specific CD8<sup>+</sup> T-cell response in a patient does not correlate signif-  
1029 icantly with average viral load. We calculated the average number of HIV-specific  
1030 (A–C), Gag-specific (D–F), and Env-specific (G–I) CD8<sup>+</sup> T-cell responses over the  
1031 whole observation period (A, D, G), during acute infection ( $t \leq 100$  days since  
1032 symptom onset; B, E, H), or during chronic infection ( $t > 100$  days since symptom  
1033 onset; C, F, I) and  $\log_{10}$  average viral load in that time period. The average viral  
1034 load during infection was not dependent on the breadth of the Gag-specific CD8<sup>+</sup>  
1035 T-cell response during the infection (D–F). Patient SUMA0874 was excluded from  
1036 the analysis in A–C due to insufficient measurements of all T-cell responses at all  
1037 time points. . . . . 8

1038 5 Expanding CD8<sup>+</sup> T-cell responses were negatively correlated with viral load before  
1039 T cell numbers reached their peak values. We calculated Spearman’s correlation  
1040 coefficients between longitudinal changes in viral load and epitope-specific CD8<sup>+</sup> T-  
1041 cell responses in each patient during the whole period (A), and before (B) and after  
1042 (C) the peak of CD8<sup>+</sup> T-cell response. The  $f(cc < 0)$  value denotes the fraction  
1043 of negative correlation coefficients ( $cc$ ), and  $p$  values are indicated for the binomial  
1044 test of equal distribution of positive and negative correlations. . . . . 9

1045 6 Differences in the kinetics of early and late HIV-specific CD8<sup>+</sup> T-cell responses. We  
1046 fitted the  $T_{\text{on}}/T_{\text{off}}$  model (eqn. (1)) to the data on the dynamics of epitope-specific  
1047 CD8<sup>+</sup> T-cell response in each patient and plotted the distribution of the estimated  
1048 parameters. The results are presented separately for T cell responses that started  
1049 expanding (or contracting) from the first observation (“early” responses, about 80%  
1050 of all responses; black) or delayed responses, which were undetectable at one or  
1051 several initial time points (“late” responses; red). Panels show distributions for (A)  
1052 time of expansion of T-cell response ( $T_{\text{on}}$ ), (B) time to peak of each T-cell response  
1053 ( $T_{\text{off}}$ ), (C) initial predicted frequency of epitope-specific CD8<sup>+</sup> T cells ( $E_0$ ), (D, E)  
1054 expansion ( $\rho$ ) and contraction ( $\alpha$ ) rates of T-cell responses, respectively, and (F)  
1055 proteins recognized by late CD8<sup>+</sup> T cell responses. In A–E,  $n$  represents the number  
1056 of fitted responses, and  $\mu$ ,  $m$  and  $\sigma$  represent mean, median and standard deviation,  
1057 respectively ( $\mu_{10}$ ,  $m_{10}$ , and  $\sigma_{10}$  are mean, median and standard deviation for  $\log_{10}$ -  
1058 scaled parameters). Late responses were predicted to have a higher expansion rate  $\rho$   
1059 (Mann–Whitney,  $p < 0.001$ ) and smaller frequency  $E_0$  (Mann–Whitney,  $p < 0.001$ )  
1060 than early responses. . . . . 10

1061 7 Correlations between major parameters determining dynamics of HIV-specific CD8<sup>+</sup>  
1062 T-cell responses in acute infection. For all epitope-specific CD8<sup>+</sup> T-cell responses  
1063 in all 22 patients (circles) or the total HIV-specific CD8<sup>+</sup> T-cell response per pa-  
1064 tient (stars), we estimated the initial frequency of epitope-specific CD8<sup>+</sup> T cells  
1065 ( $E_0$ ), rate of expansion of T cell populations ( $\rho$ ), time of the peak of the response  
1066 ( $T_{\text{off}}$ ), rate of contraction of the immune response after the peak ( $\alpha$ ), predicted peak  
1067 values reached by the epitope-specific CD8<sup>+</sup> T-cell response ( $E_{\text{peak}} = E(T_{\text{off}})$ ), and  
1068 the average viral load ( $V_E$ ). Solid lines denote regression lines; regression equations  
1069 and  $p$  values are indicated on individual panels for all epitope-specific CD8<sup>+</sup> T-cell  
1070 responses. The total HIV-specific CD8<sup>+</sup> T-cell response showed a similar trend to  
1071 all epitope-specific CD8<sup>+</sup> T-cell responses (results not shown). Panels show correla-  
1072 tions between the timing of the immune response peak  $T_{\text{off}}$  and predicted frequency  
1073  $E_0$  (A),  $T_{\text{off}}$  and  $\rho$  (B), expansion rate  $\rho$  and average viral load  $V_E$  (C),  $\rho$  and  $E_0$   
1074 (D), peak immune response  $E_{\text{peak}}$  and  $E_0$  (E), and  $E_{\text{peak}}$  and  $V_E$  (F). For a given  
1075 patient, we calculated the total HIV-specific CD8<sup>+</sup> T cell response as the sum of  
1076 all epitope-specific CD8<sup>+</sup> T-cell responses at the same time point (i.e., by ignoring  
1077 “nd”). For patient MM42, we could not fit the  $T_{\text{on}}/T_{\text{off}}$  model to the dynamics of  
1078 total CD8<sup>+</sup> T cell response data because of wide oscillations in the data. Identified  
1079 relationships did not change if estimates for responses with unphysiological initial  
1080 frequencies ( $E_0 \leq 10^{-2}$ ) were excluded from the analysis (results not shown). . . . . 13

1081 8 Evidence of interclonal competition between epitope-specific CD8<sup>+</sup> T cell responses.  
1082 We calculated Spearman’s rank correlation coefficients between longitudinal changes  
1083 of pairs of epitope-specific CD8<sup>+</sup> T cell responses in a given patient (see individual  
1084 panels) and plotted the distribution of these coefficients. Panels show the number  
1085 of correlations ( $n$ ), fraction of negative correlation coefficients ( $f(cc) < 0$ ), and  $p$   
1086 values for the deviance of the distribution from uniform, found using the binomial  
1087 test with null being the equal fraction of positive and negative correlations. We  
1088 found that the majority of CD8<sup>+</sup> T cell populations expand and contract in unison  
1089 and therefore do not appear to compete during the infection. Overall, discordant  
1090 dynamics (negative correlation coefficients) were observed for 18% of all responses  
1091 irrespective of the stage of infection (acute or chronic). Patients MM38 and MM40  
1092 were excluded from the analysis for having too few correlation pairs (two or three). 15

1093 9 Average size of epitope-specific CD8<sup>+</sup> T-cell response is unrelated to the number of  
1094 HIV-specific T-cell responses. For every patient, we calculated the average number  
1095 of HIV-specific CD8<sup>+</sup> T-cell responses and the average density of epitope-specific T  
1096 cells in a given observation period. To exclude the contribution of viral load to this  
1097 relationship, we divided all 22 patients into three groups according to their mean  
1098 viral load (low  $\log_{10}$  viral load: 3.40–4.44; intermediate viral load: 4.60–5.03; high  
1099 viral load: 5.25–6.83). Groups were estimated using the Manhattan Distance with  
1100 the `FindClusters` function in `Mathematica`. Regression lines and corresponding  
1101  $p$  values are indicated on individual panels. Overall, results varied by time period  
1102 and most correlations were not statistically significant (Fig. S12). . . . . 16

|      |    |                                                                                                                                                                                                                                                                                                                                                                                                                                                                                                                                                                                                                                                                                               |    |
|------|----|-----------------------------------------------------------------------------------------------------------------------------------------------------------------------------------------------------------------------------------------------------------------------------------------------------------------------------------------------------------------------------------------------------------------------------------------------------------------------------------------------------------------------------------------------------------------------------------------------------------------------------------------------------------------------------------------------|----|
| 1103 | S1 | Kinetics of HIV-specific CD8 <sup>+</sup> T-cell responses measured by IFN- $\gamma$ ELISPOT assay in patients SUMA0874, MM49, MM56, MM43, MM50, and MM19. Measurements below the level of detection are plotted as having a value of 0.1. Patients are listed in descending order according to the total number of T-cell responses measured. We divided T cell responses into four groups according to their target protein (1: Env; 2: Gag, Gag/Protease, Integrase, RT; 3: Nef, Pol, Protease, Protease/Rt; 4: Rev, Tat, Vif, Vpr). . . . .                                                                                                                                               | S1 |
| 1104 |    |                                                                                                                                                                                                                                                                                                                                                                                                                                                                                                                                                                                                                                                                                               |    |
| 1105 |    |                                                                                                                                                                                                                                                                                                                                                                                                                                                                                                                                                                                                                                                                                               |    |
| 1106 |    |                                                                                                                                                                                                                                                                                                                                                                                                                                                                                                                                                                                                                                                                                               |    |
| 1107 |    |                                                                                                                                                                                                                                                                                                                                                                                                                                                                                                                                                                                                                                                                                               |    |
| 1108 |    |                                                                                                                                                                                                                                                                                                                                                                                                                                                                                                                                                                                                                                                                                               |    |
| 1109 |    |                                                                                                                                                                                                                                                                                                                                                                                                                                                                                                                                                                                                                                                                                               |    |
| 1110 | S2 | Kinetics of HIV-specific CD8 <sup>+</sup> T-cell responses measured by IFN- $\gamma$ ELISPOT assay in patients MM46, MM45, WEAU0575, MM55, MM23, BORI0637, MM48, and MM47. See Fig. S1 caption for more detail. . . . .                                                                                                                                                                                                                                                                                                                                                                                                                                                                       | S2 |
| 1111 |    |                                                                                                                                                                                                                                                                                                                                                                                                                                                                                                                                                                                                                                                                                               |    |
| 1112 |    |                                                                                                                                                                                                                                                                                                                                                                                                                                                                                                                                                                                                                                                                                               |    |
| 1113 | S3 | Kinetics of HIV-specific CD8 <sup>+</sup> T-cell responses measured by IFN- $\gamma$ ELISPOT assay in patients MM28, MM25, MM33, MM39, MM51, MM42, MM40, and MM38, respectively. See Fig. S1 caption for more detail. . . . .                                                                                                                                                                                                                                                                                                                                                                                                                                                                 | S3 |
| 1114 |    |                                                                                                                                                                                                                                                                                                                                                                                                                                                                                                                                                                                                                                                                                               |    |
| 1115 |    |                                                                                                                                                                                                                                                                                                                                                                                                                                                                                                                                                                                                                                                                                               |    |
| 1116 | S4 | Kinetics of total HIV-specific CD8 <sup>+</sup> T-cell response measured by IFN- $\gamma$ ELISPOT assay and viral load in 20 patients in the cohort. For each patient, total CD8 <sup>+</sup> T-cell response (squares) and viral load (circles) are plotted over time. Note that patient WEAU0575 was followed for longer than all other patients (772 days after symptom onset). Patients SUMA0874 and MM19 were excluded from this plot due to insufficient measurements of all T-cell responses at all time points. . . . .                                                                                                                                                               | S4 |
| 1117 |    |                                                                                                                                                                                                                                                                                                                                                                                                                                                                                                                                                                                                                                                                                               |    |
| 1118 |    |                                                                                                                                                                                                                                                                                                                                                                                                                                                                                                                                                                                                                                                                                               |    |
| 1119 |    |                                                                                                                                                                                                                                                                                                                                                                                                                                                                                                                                                                                                                                                                                               |    |
| 1120 |    |                                                                                                                                                                                                                                                                                                                                                                                                                                                                                                                                                                                                                                                                                               |    |
| 1121 |    |                                                                                                                                                                                                                                                                                                                                                                                                                                                                                                                                                                                                                                                                                               |    |
| 1122 | S5 | Nonsignificant change in the number of HIV-specific CD8 <sup>+</sup> T cell responses in all patients over the course of infection. We divided the whole observation period into different time bins (50-day intervals (A) or 100-day intervals (B)) and calculated the number of T-cell responses (breadth) for the corresponding group. Small horizontal bar denotes mean breadth for that time interval. Spearman's rank coefficient was used to determine the significance of breadth change over time (correlation coefficient $\rho$ and $p$ values). Patient SUMA0874 was excluded from this plot due to insufficient measurements in all T-cell responses at all time points. . . . . | S5 |
| 1123 |    |                                                                                                                                                                                                                                                                                                                                                                                                                                                                                                                                                                                                                                                                                               |    |
| 1124 |    |                                                                                                                                                                                                                                                                                                                                                                                                                                                                                                                                                                                                                                                                                               |    |
| 1125 |    |                                                                                                                                                                                                                                                                                                                                                                                                                                                                                                                                                                                                                                                                                               |    |
| 1126 |    |                                                                                                                                                                                                                                                                                                                                                                                                                                                                                                                                                                                                                                                                                               |    |
| 1127 |    |                                                                                                                                                                                                                                                                                                                                                                                                                                                                                                                                                                                                                                                                                               |    |
| 1128 |    |                                                                                                                                                                                                                                                                                                                                                                                                                                                                                                                                                                                                                                                                                               |    |
| 1129 |    |                                                                                                                                                                                                                                                                                                                                                                                                                                                                                                                                                                                                                                                                                               |    |
| 1130 | S6 | Nonsignificant changes of total CD8 <sup>+</sup> T-cell response in all patients. We divided the whole observation period into different time bins (50-day intervals (A) or 100-day intervals (B)) and calculated the sum of all T-cell responses for a given patient. Small horizontal bar denotes average CD8 <sup>+</sup> T cell response level for that time interval. For different time intervals (e.g., 15- or 30-day intervals), we found similar trends (results not shown). . . . .                                                                                                                                                                                                 | S5 |
| 1131 |    |                                                                                                                                                                                                                                                                                                                                                                                                                                                                                                                                                                                                                                                                                               |    |
| 1132 |    |                                                                                                                                                                                                                                                                                                                                                                                                                                                                                                                                                                                                                                                                                               |    |
| 1133 |    |                                                                                                                                                                                                                                                                                                                                                                                                                                                                                                                                                                                                                                                                                               |    |
| 1134 |    |                                                                                                                                                                                                                                                                                                                                                                                                                                                                                                                                                                                                                                                                                               |    |
| 1135 |    |                                                                                                                                                                                                                                                                                                                                                                                                                                                                                                                                                                                                                                                                                               |    |

|      |     |                                                                                                                                                                                                                                                                                                                                                                                                                                                                                                                                                                                                                                                                                                                                                                                                                                                                                                                                                                                                                                                                                                                                                                                                                                            |     |
|------|-----|--------------------------------------------------------------------------------------------------------------------------------------------------------------------------------------------------------------------------------------------------------------------------------------------------------------------------------------------------------------------------------------------------------------------------------------------------------------------------------------------------------------------------------------------------------------------------------------------------------------------------------------------------------------------------------------------------------------------------------------------------------------------------------------------------------------------------------------------------------------------------------------------------------------------------------------------------------------------------------------------------------------------------------------------------------------------------------------------------------------------------------------------------------------------------------------------------------------------------------------------|-----|
| 1136 | S7  | Variable dynamics of T-cell response breadth in individual patients. Normalized immune response breadth was defined as the number of responses at a particular time divided by the total number of responses measured in that patient. The shaded bars (or vertical lines) denote times when T-cell response mapping was performed with pooled PBMCs in each patient; in patients MM33 and MM39, mapping was performed twice. Due to missing measurements (“nd”) in some epitope-specific CD8 <sup>+</sup> T cell responses, we estimated the breadth at certain time points for a particular patient in two ways: 1) ignoring the time point (red crosshair ×), or 2) replacing the “nd” with 0 (black dot ●) when there was at least one missing measurement at this time point. We found that in some patients (e.g., MM45, MM48, MM49) the breadth expanded slightly to saturation level, and in others, contraction phases followed the saturation (e.g., MM43, MM55). Patient WEAU0575 was followed for 772 days after symptom onset, so the <i>x</i> -axis for this patient is longer. Patients SUMA0874 and MM19 were excluded from this plot due to insufficient measurements of all T-cell responses at all time points. . . . . | S6  |
| 1137 |     |                                                                                                                                                                                                                                                                                                                                                                                                                                                                                                                                                                                                                                                                                                                                                                                                                                                                                                                                                                                                                                                                                                                                                                                                                                            |     |
| 1138 |     |                                                                                                                                                                                                                                                                                                                                                                                                                                                                                                                                                                                                                                                                                                                                                                                                                                                                                                                                                                                                                                                                                                                                                                                                                                            |     |
| 1139 |     |                                                                                                                                                                                                                                                                                                                                                                                                                                                                                                                                                                                                                                                                                                                                                                                                                                                                                                                                                                                                                                                                                                                                                                                                                                            |     |
| 1140 |     |                                                                                                                                                                                                                                                                                                                                                                                                                                                                                                                                                                                                                                                                                                                                                                                                                                                                                                                                                                                                                                                                                                                                                                                                                                            |     |
| 1141 |     |                                                                                                                                                                                                                                                                                                                                                                                                                                                                                                                                                                                                                                                                                                                                                                                                                                                                                                                                                                                                                                                                                                                                                                                                                                            |     |
| 1142 |     |                                                                                                                                                                                                                                                                                                                                                                                                                                                                                                                                                                                                                                                                                                                                                                                                                                                                                                                                                                                                                                                                                                                                                                                                                                            |     |
| 1143 |     |                                                                                                                                                                                                                                                                                                                                                                                                                                                                                                                                                                                                                                                                                                                                                                                                                                                                                                                                                                                                                                                                                                                                                                                                                                            |     |
| 1144 |     |                                                                                                                                                                                                                                                                                                                                                                                                                                                                                                                                                                                                                                                                                                                                                                                                                                                                                                                                                                                                                                                                                                                                                                                                                                            |     |
| 1145 |     |                                                                                                                                                                                                                                                                                                                                                                                                                                                                                                                                                                                                                                                                                                                                                                                                                                                                                                                                                                                                                                                                                                                                                                                                                                            |     |
| 1146 |     |                                                                                                                                                                                                                                                                                                                                                                                                                                                                                                                                                                                                                                                                                                                                                                                                                                                                                                                                                                                                                                                                                                                                                                                                                                            |     |
| 1147 |     |                                                                                                                                                                                                                                                                                                                                                                                                                                                                                                                                                                                                                                                                                                                                                                                                                                                                                                                                                                                                                                                                                                                                                                                                                                            |     |
| 1148 |     |                                                                                                                                                                                                                                                                                                                                                                                                                                                                                                                                                                                                                                                                                                                                                                                                                                                                                                                                                                                                                                                                                                                                                                                                                                            |     |
| 1149 |     |                                                                                                                                                                                                                                                                                                                                                                                                                                                                                                                                                                                                                                                                                                                                                                                                                                                                                                                                                                                                                                                                                                                                                                                                                                            |     |
| 1150 |     |                                                                                                                                                                                                                                                                                                                                                                                                                                                                                                                                                                                                                                                                                                                                                                                                                                                                                                                                                                                                                                                                                                                                                                                                                                            |     |
| 1151 | S8  | <i>SE</i> and <i>EI</i> of T-cell responses moderately increased over time. <i>SE</i> and <i>EI</i> were calculated at different time points for all patients (see Material and Methods for more detail); we found a moderate but statistically significant positive trend (Spearman Rank Correlation: $\rho = 0.30$ ( $p = 0.00074$ ) and $\rho = 0.49$ ( $p \ll 0.0001$ )). Major significant changes in both measures of breadth occurred within the first 40 days of symptom onset. Analyses included only the time points at which all CD8 <sup>+</sup> T-cell responses were measured. Detailed <i>SE</i> and <i>EI</i> kinetics in each patient are shown in Figs. S9 and S10, respectively. . . . .                                                                                                                                                                                                                                                                                                                                                                                                                                                                                                                                | S7  |
| 1152 |     |                                                                                                                                                                                                                                                                                                                                                                                                                                                                                                                                                                                                                                                                                                                                                                                                                                                                                                                                                                                                                                                                                                                                                                                                                                            |     |
| 1153 |     |                                                                                                                                                                                                                                                                                                                                                                                                                                                                                                                                                                                                                                                                                                                                                                                                                                                                                                                                                                                                                                                                                                                                                                                                                                            |     |
| 1154 |     |                                                                                                                                                                                                                                                                                                                                                                                                                                                                                                                                                                                                                                                                                                                                                                                                                                                                                                                                                                                                                                                                                                                                                                                                                                            |     |
| 1155 |     |                                                                                                                                                                                                                                                                                                                                                                                                                                                                                                                                                                                                                                                                                                                                                                                                                                                                                                                                                                                                                                                                                                                                                                                                                                            |     |
| 1156 |     |                                                                                                                                                                                                                                                                                                                                                                                                                                                                                                                                                                                                                                                                                                                                                                                                                                                                                                                                                                                                                                                                                                                                                                                                                                            |     |
| 1157 |     |                                                                                                                                                                                                                                                                                                                                                                                                                                                                                                                                                                                                                                                                                                                                                                                                                                                                                                                                                                                                                                                                                                                                                                                                                                            |     |
| 1158 |     |                                                                                                                                                                                                                                                                                                                                                                                                                                                                                                                                                                                                                                                                                                                                                                                                                                                                                                                                                                                                                                                                                                                                                                                                                                            |     |
| 1159 | S9  | Kinetics of <i>SI</i> (dashed line) and corresponding linear fitted curve (solid line) for all patients. No trends were statistically significant ( $p$ values from linear regressions are indicated on panels). . . . .                                                                                                                                                                                                                                                                                                                                                                                                                                                                                                                                                                                                                                                                                                                                                                                                                                                                                                                                                                                                                   | S8  |
| 1160 |     |                                                                                                                                                                                                                                                                                                                                                                                                                                                                                                                                                                                                                                                                                                                                                                                                                                                                                                                                                                                                                                                                                                                                                                                                                                            |     |
| 1161 |     |                                                                                                                                                                                                                                                                                                                                                                                                                                                                                                                                                                                                                                                                                                                                                                                                                                                                                                                                                                                                                                                                                                                                                                                                                                            |     |
| 1162 | S10 | Kinetics of <i>EI</i> (dashed line) and corresponding linear fitted curve (solid line) for all patients. Two out of 24 patients showed significant increase in <i>EI</i> over time while other trends were not significant ( $p$ values for linear regressions are indicated on the panels). . . . .                                                                                                                                                                                                                                                                                                                                                                                                                                                                                                                                                                                                                                                                                                                                                                                                                                                                                                                                       | S9  |
| 1163 |     |                                                                                                                                                                                                                                                                                                                                                                                                                                                                                                                                                                                                                                                                                                                                                                                                                                                                                                                                                                                                                                                                                                                                                                                                                                            |     |
| 1164 |     |                                                                                                                                                                                                                                                                                                                                                                                                                                                                                                                                                                                                                                                                                                                                                                                                                                                                                                                                                                                                                                                                                                                                                                                                                                            |     |
| 1165 |     |                                                                                                                                                                                                                                                                                                                                                                                                                                                                                                                                                                                                                                                                                                                                                                                                                                                                                                                                                                                                                                                                                                                                                                                                                                            |     |
| 1166 | S11 | Variable correlations between viral load ( <i>V</i> ) and <i>SE</i> (A–C) or <i>EI</i> (B–F) of Gag-specific CD8 <sup>+</sup> T-cell responses. Note a positive (but nonsignificant) correlation between viral load and breadth measured by <i>EI</i> , and positive correlation between breadth measured as <i>SE</i> and <i>V</i> for chronic infection ( $t > 100$ days after symptom onset). . . . .                                                                                                                                                                                                                                                                                                                                                                                                                                                                                                                                                                                                                                                                                                                                                                                                                                   | S10 |
| 1167 |     |                                                                                                                                                                                                                                                                                                                                                                                                                                                                                                                                                                                                                                                                                                                                                                                                                                                                                                                                                                                                                                                                                                                                                                                                                                            |     |
| 1168 |     |                                                                                                                                                                                                                                                                                                                                                                                                                                                                                                                                                                                                                                                                                                                                                                                                                                                                                                                                                                                                                                                                                                                                                                                                                                            |     |
| 1169 |     |                                                                                                                                                                                                                                                                                                                                                                                                                                                                                                                                                                                                                                                                                                                                                                                                                                                                                                                                                                                                                                                                                                                                                                                                                                            |     |
| 1170 |     |                                                                                                                                                                                                                                                                                                                                                                                                                                                                                                                                                                                                                                                                                                                                                                                                                                                                                                                                                                                                                                                                                                                                                                                                                                            |     |
| 1171 | S12 | Correlation between number of T-cell responses and average size of T-cell response depends on viral load and time period since infection. Correlation between number of immune responses and average size of T-cell response is shown for chronic infection (top row) or for the whole time period (middle row) for different average viral loads. Bottom row shows correlation for all data at different time periods since infection. $p$ values are from linear regressions; best fit equations are shown on individual panels. Some correlations are negative, indicating the presence of interclonal competition. Low, intermediate, and high viral loads were defined as described in Fig. 9. . . . .                                                                                                                                                                                                                                                                                                                                                                                                                                                                                                                                | S11 |
| 1172 |     |                                                                                                                                                                                                                                                                                                                                                                                                                                                                                                                                                                                                                                                                                                                                                                                                                                                                                                                                                                                                                                                                                                                                                                                                                                            |     |
| 1173 |     |                                                                                                                                                                                                                                                                                                                                                                                                                                                                                                                                                                                                                                                                                                                                                                                                                                                                                                                                                                                                                                                                                                                                                                                                                                            |     |
| 1174 |     |                                                                                                                                                                                                                                                                                                                                                                                                                                                                                                                                                                                                                                                                                                                                                                                                                                                                                                                                                                                                                                                                                                                                                                                                                                            |     |
| 1175 |     |                                                                                                                                                                                                                                                                                                                                                                                                                                                                                                                                                                                                                                                                                                                                                                                                                                                                                                                                                                                                                                                                                                                                                                                                                                            |     |
| 1176 |     |                                                                                                                                                                                                                                                                                                                                                                                                                                                                                                                                                                                                                                                                                                                                                                                                                                                                                                                                                                                                                                                                                                                                                                                                                                            |     |
| 1177 |     |                                                                                                                                                                                                                                                                                                                                                                                                                                                                                                                                                                                                                                                                                                                                                                                                                                                                                                                                                                                                                                                                                                                                                                                                                                            |     |
| 1178 |     |                                                                                                                                                                                                                                                                                                                                                                                                                                                                                                                                                                                                                                                                                                                                                                                                                                                                                                                                                                                                                                                                                                                                                                                                                                            |     |
| 1179 |     |                                                                                                                                                                                                                                                                                                                                                                                                                                                                                                                                                                                                                                                                                                                                                                                                                                                                                                                                                                                                                                                                                                                                                                                                                                            |     |
| 1180 | S13 | Examples of data on the kinetics of epitope-specific CD8 <sup>+</sup> T-cell responses and the predicted fits of the basic $T_{\text{on}}-T_{\text{off}}$ model eqn. (1) to these data. In all three examples there were no initial zeroes recorded so we set $T_{\text{on}} = 0$ for simplicity. . . . .                                                                                                                                                                                                                                                                                                                                                                                                                                                                                                                                                                                                                                                                                                                                                                                                                                                                                                                                  | S11 |
| 1181 |     |                                                                                                                                                                                                                                                                                                                                                                                                                                                                                                                                                                                                                                                                                                                                                                                                                                                                                                                                                                                                                                                                                                                                                                                                                                            |     |
| 1182 |     |                                                                                                                                                                                                                                                                                                                                                                                                                                                                                                                                                                                                                                                                                                                                                                                                                                                                                                                                                                                                                                                                                                                                                                                                                                            |     |

|      |     |                                                                                                                                                                                                                                                                                                                                                                                                                                                                                              |     |
|------|-----|----------------------------------------------------------------------------------------------------------------------------------------------------------------------------------------------------------------------------------------------------------------------------------------------------------------------------------------------------------------------------------------------------------------------------------------------------------------------------------------------|-----|
| 1183 | S14 | Examples of strongly negatively (A&C) and strongly positively(B&D) correlated viral load and epitope-specific CD8 <sup>+</sup> T-cell responses or different epitope-specific CD8 <sup>+</sup> T-cell responses. The correlation coefficients ( $\rho$ ) were used to generate the histogram in Figures 5 or 8. . . . .                                                                                                                                                                      | S12 |
| 1184 |     |                                                                                                                                                                                                                                                                                                                                                                                                                                                                                              |     |
| 1185 |     |                                                                                                                                                                                                                                                                                                                                                                                                                                                                                              |     |
| 1186 |     |                                                                                                                                                                                                                                                                                                                                                                                                                                                                                              |     |
| 1187 | S15 | Detailed distributions of correlation coefficient ( $cc$ ) between different epitope-specific CD8 <sup>+</sup> T-cell responses (IRs) in different patients for $t \leq 100$ days after symptom onset (acute infection). Negatively correlated epitope-specific CD8 <sup>+</sup> T cell responses were observed for nearly all patients, suggesting that interclonal competition between T cell responses specific to different HIV epitopes may occur in all HIV-infected patients. . . . . | S13 |
| 1188 |     |                                                                                                                                                                                                                                                                                                                                                                                                                                                                                              |     |
| 1189 |     |                                                                                                                                                                                                                                                                                                                                                                                                                                                                                              |     |
| 1190 |     |                                                                                                                                                                                                                                                                                                                                                                                                                                                                                              |     |
| 1191 |     |                                                                                                                                                                                                                                                                                                                                                                                                                                                                                              |     |
| 1192 |     |                                                                                                                                                                                                                                                                                                                                                                                                                                                                                              |     |

1193 **Supplementary Information**

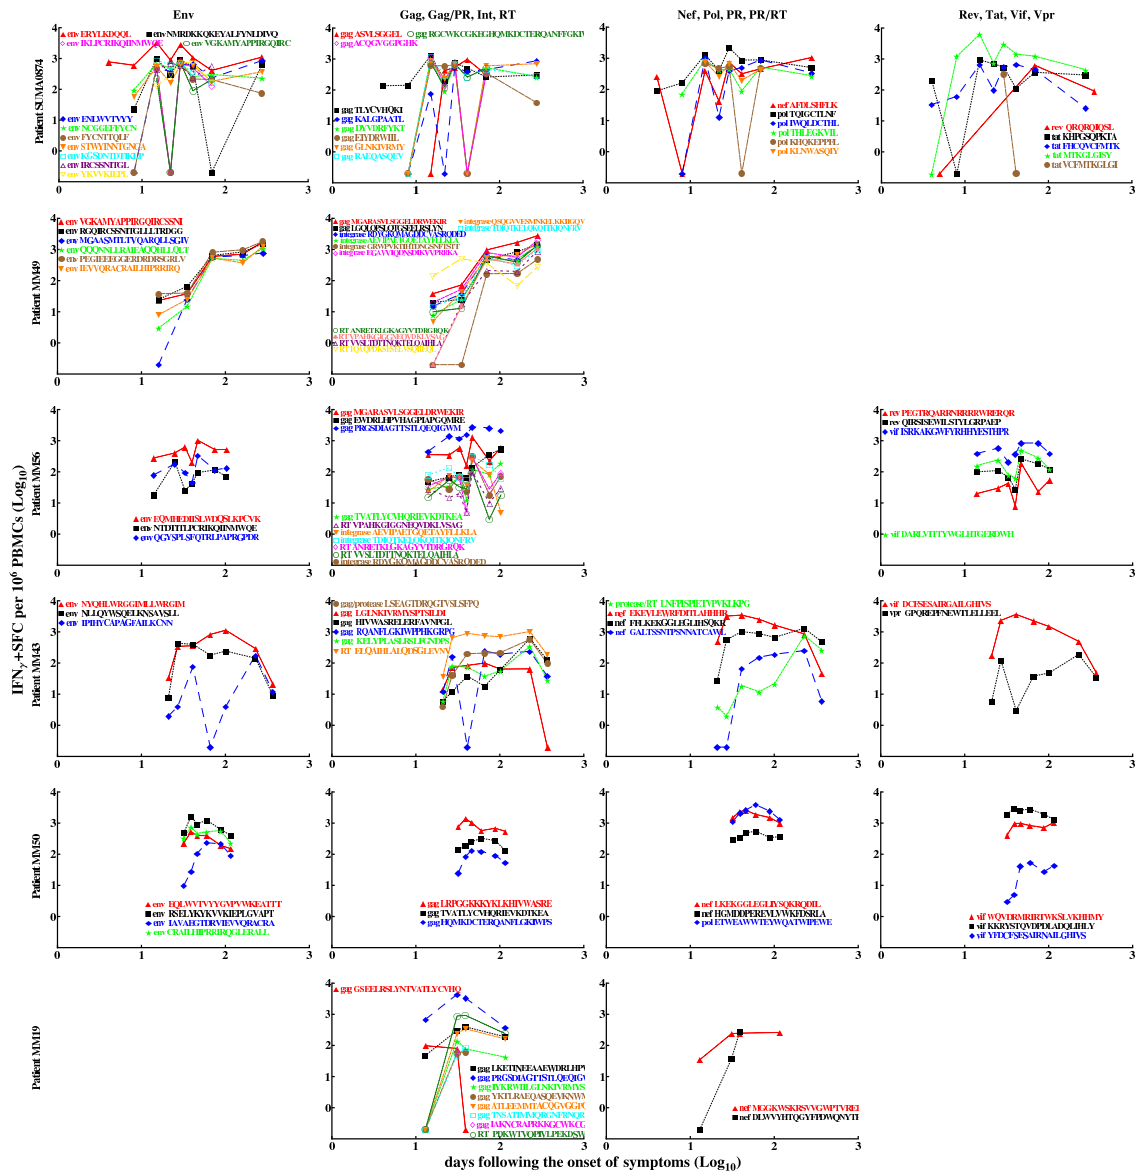

**Figure S1:** Kinetics of HIV-specific CD4<sup>+</sup> T-cell responses measured by IFN- $\gamma$  ELISPOT assay in patients SUMA0874, MM49, MM56, MM43, MM50, and MM19. Measurements below the level of detection are plotted as having a value of 0.1. Patients are listed in descending order according to the total number of T-cell responses measured. We divided T cell responses into four groups according to their target protein (1: Env; 2: Gag, Gag/Protease, Integrase, RT; 3: Nef, Pol, Protease, Protease/Rt; 4: Rev, Tat, Vif, Vpr).

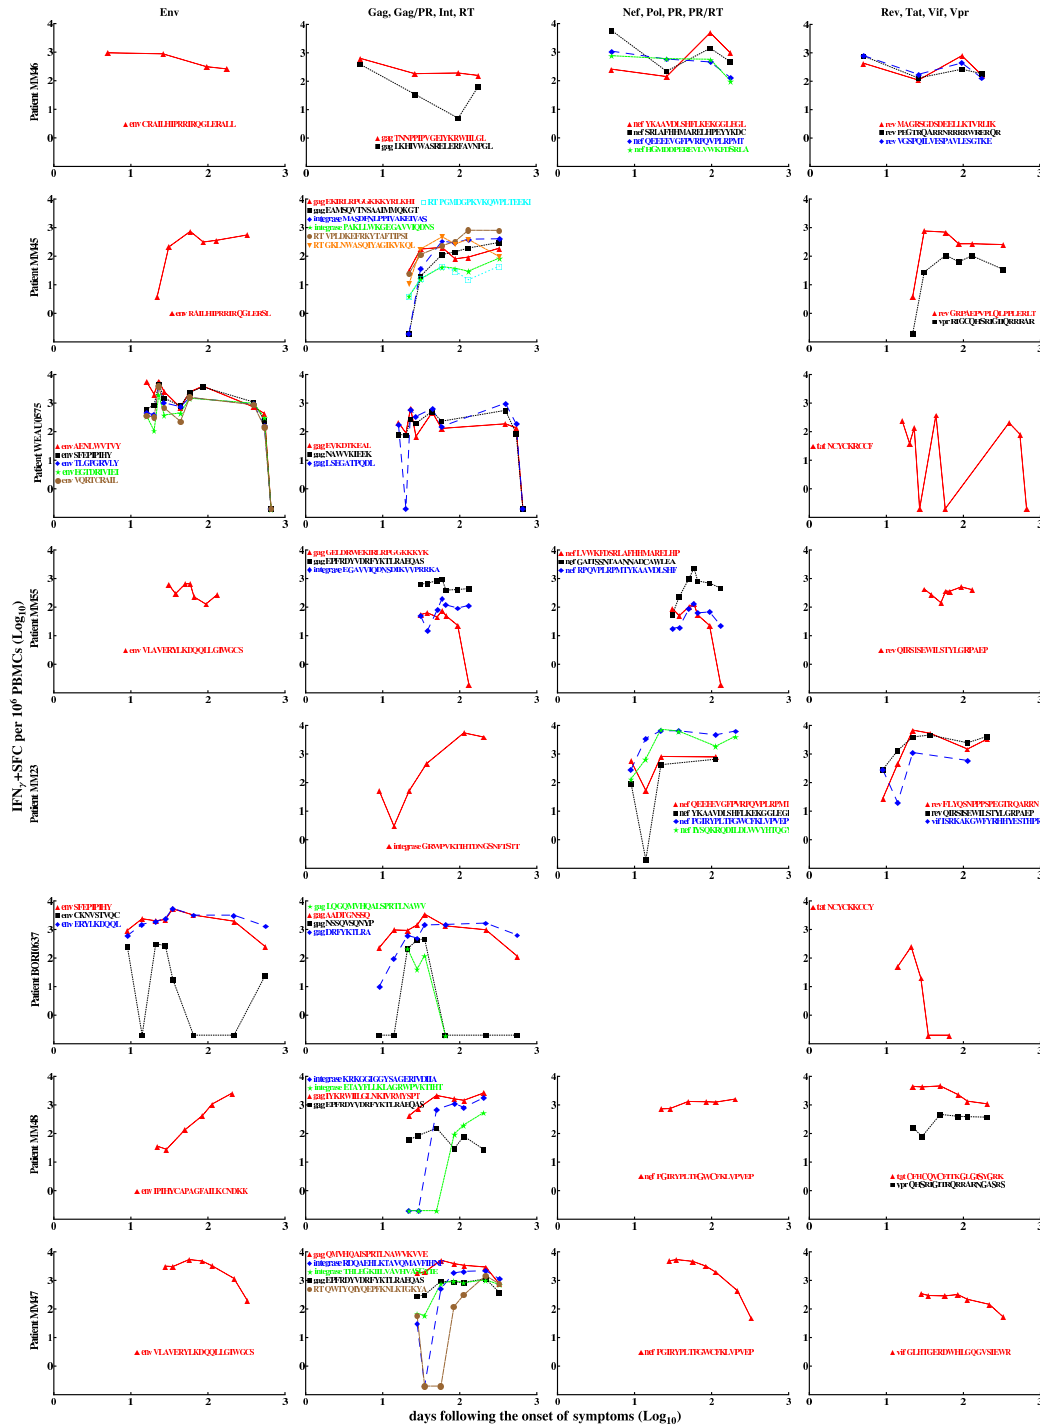

**Figure S2:** Kinetics of HIV-specific CD8<sup>+</sup> T-cell responses measured by IFN- $\gamma$  ELISPOT assay in patients MM46, MM45, WEAU0575, MM55, MM23, BORI0637, MM48, and MM47. See Fig. S1 caption for more detail.

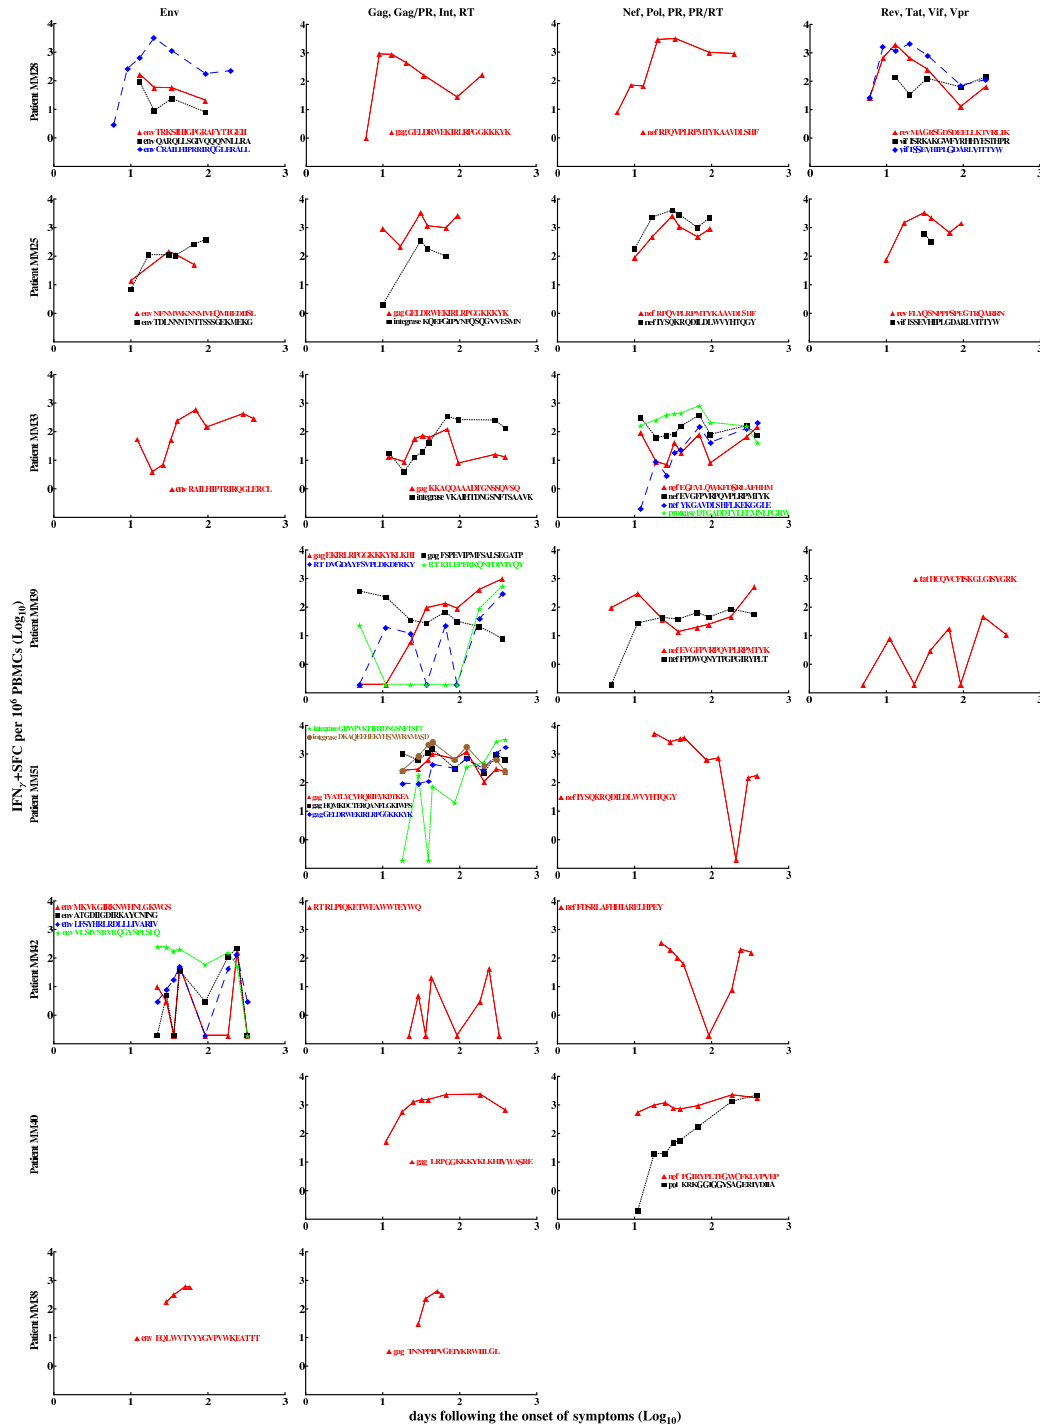

**Figure S3:** Kinetics of HIV-specific CD8<sup>+</sup> T-cell responses measured by IFN- $\gamma$  ELISPOT assay in patients MM28, MM25, MM33, MM39, MM51, MM42, MM40, and MM38, respectively. See Fig. S1 caption for more detail.



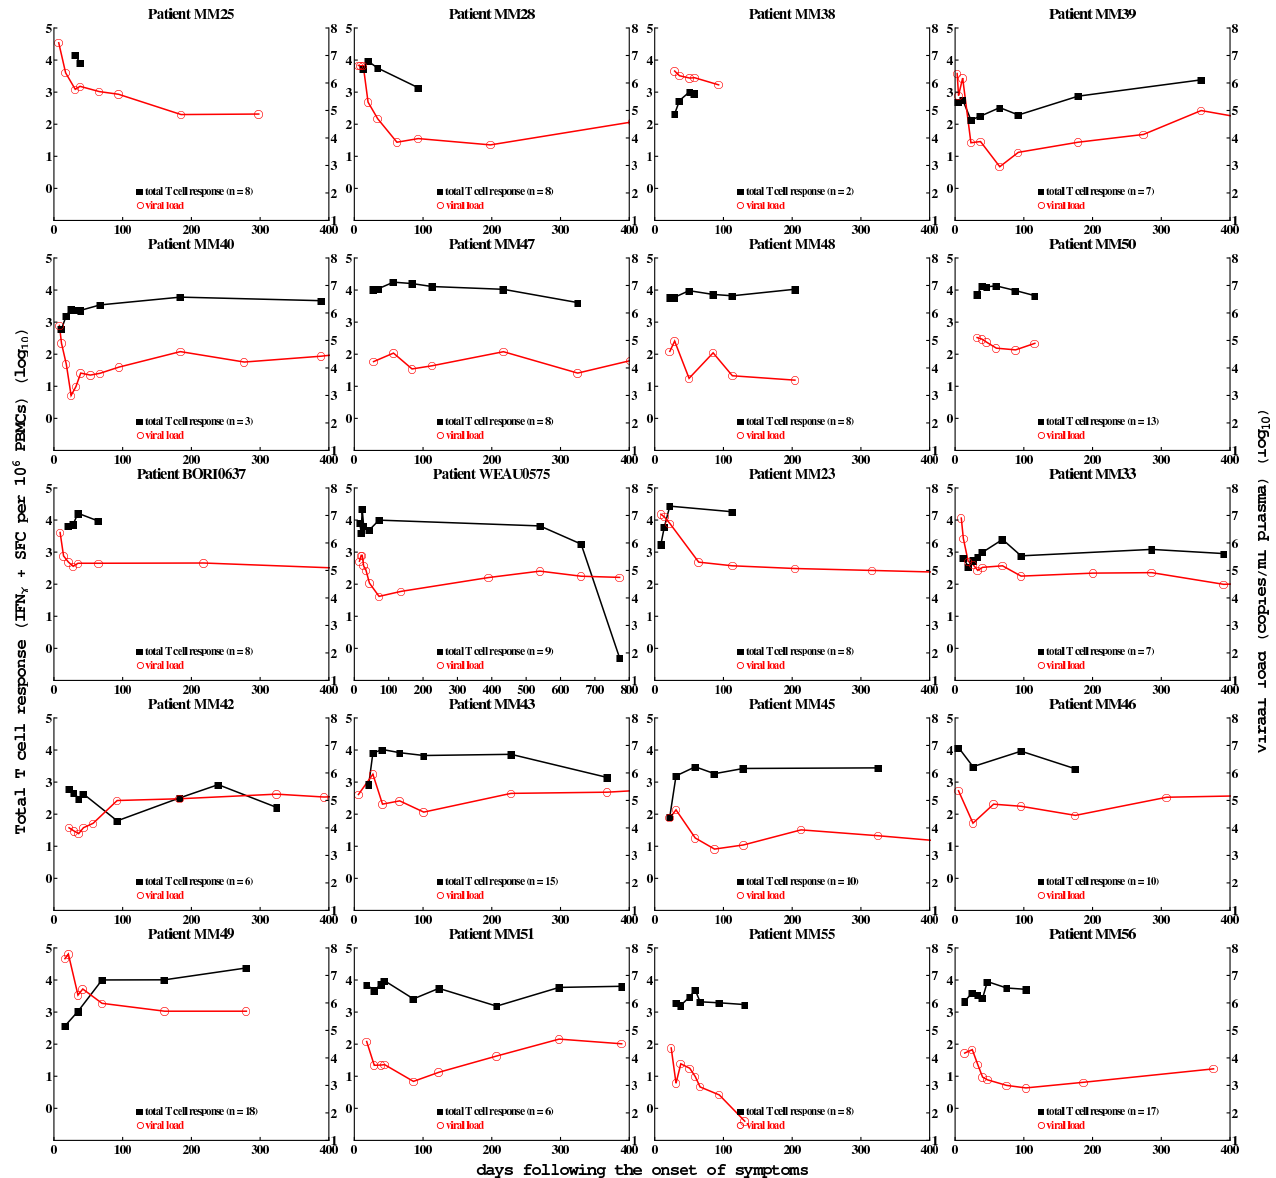

**Figure S4:** Kinetics of total HIV-specific CD8<sup>+</sup> T-cell response measured by IFN- $\gamma$  ELISPOT assay and viral load in 20 patients in the cohort. For each patient, total CD8<sup>+</sup> T-cell response (squares) and viral load (circles) are plotted over time. Note that patient WEAU0575 was followed for longer than all other patients (772 days after symptom onset). Patients SUMA0874 and MM19 were excluded from this plot due to insufficient measurements of all T-cell responses at all time points.

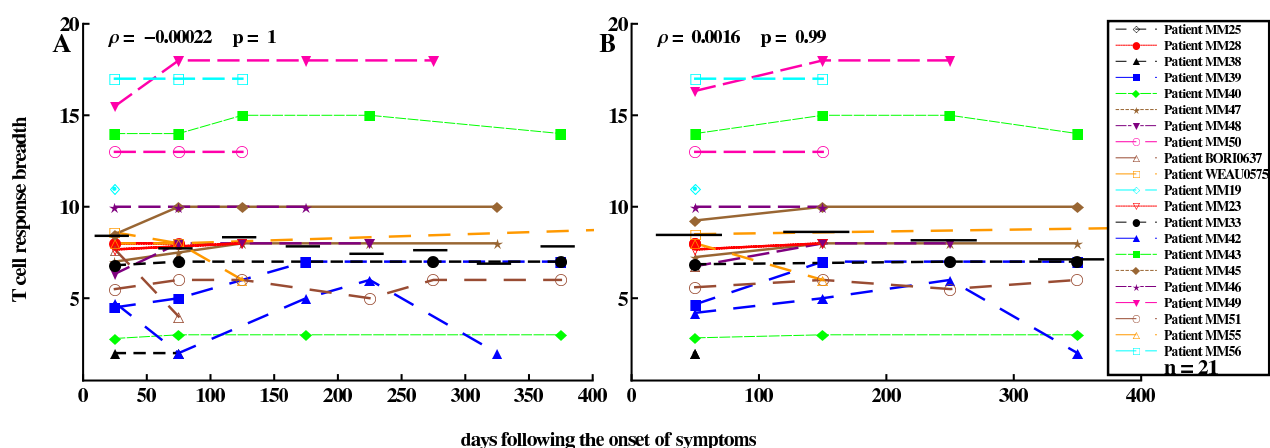

**Figure S5:** Nonsignificant change in the number of HIV-specific CD8<sup>+</sup> T cell responses in all patients over the course of infection. We divided the whole observation period into different time bins (50-day intervals (A) or 100-day intervals (B)) and calculated the number of T-cell responses (breadth) for the corresponding group. Small horizontal bar denotes mean breadth for that time interval. Spearman's rank coefficient was used to determine the significance of breadth change over time (correlation coefficient  $\rho$  and  $p$  values). Patient SUMA0874 was excluded from this plot due to insufficient measurements in all T-cell responses at all time points.

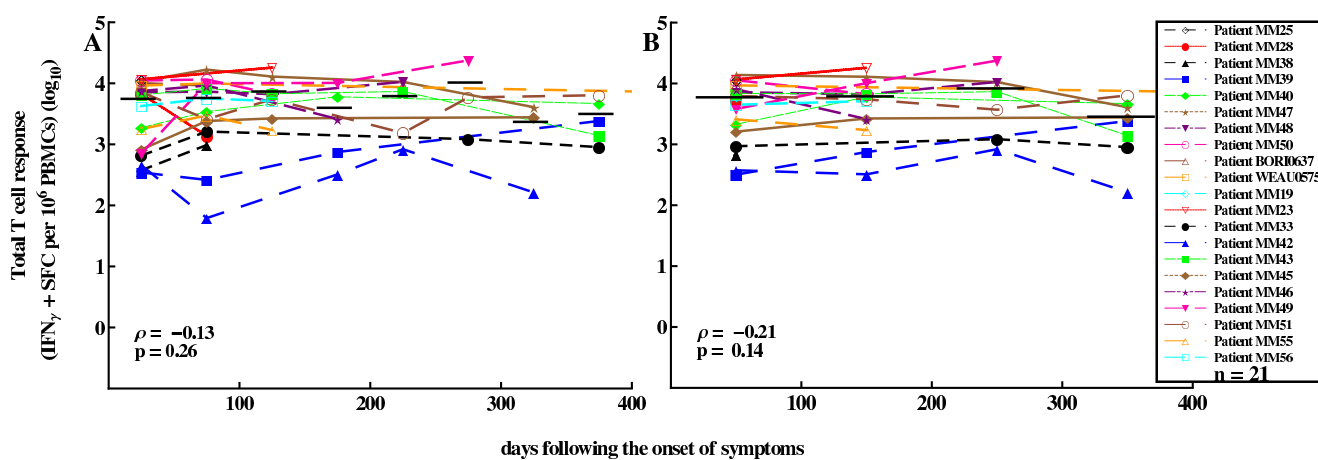

**Figure S6:** Nonsignificant changes of total CD8<sup>+</sup> T-cell response in all patients. We divided the whole observation period into different time bins (50-day intervals (A) or 100-day intervals (B)) and calculated the sum of all T-cell responses for a given patient. Small horizontal bar denotes average CD8<sup>+</sup> T cell response level for that time interval. For different time intervals (e.g., 15- or 30-day intervals), we found similar trends (results not shown).

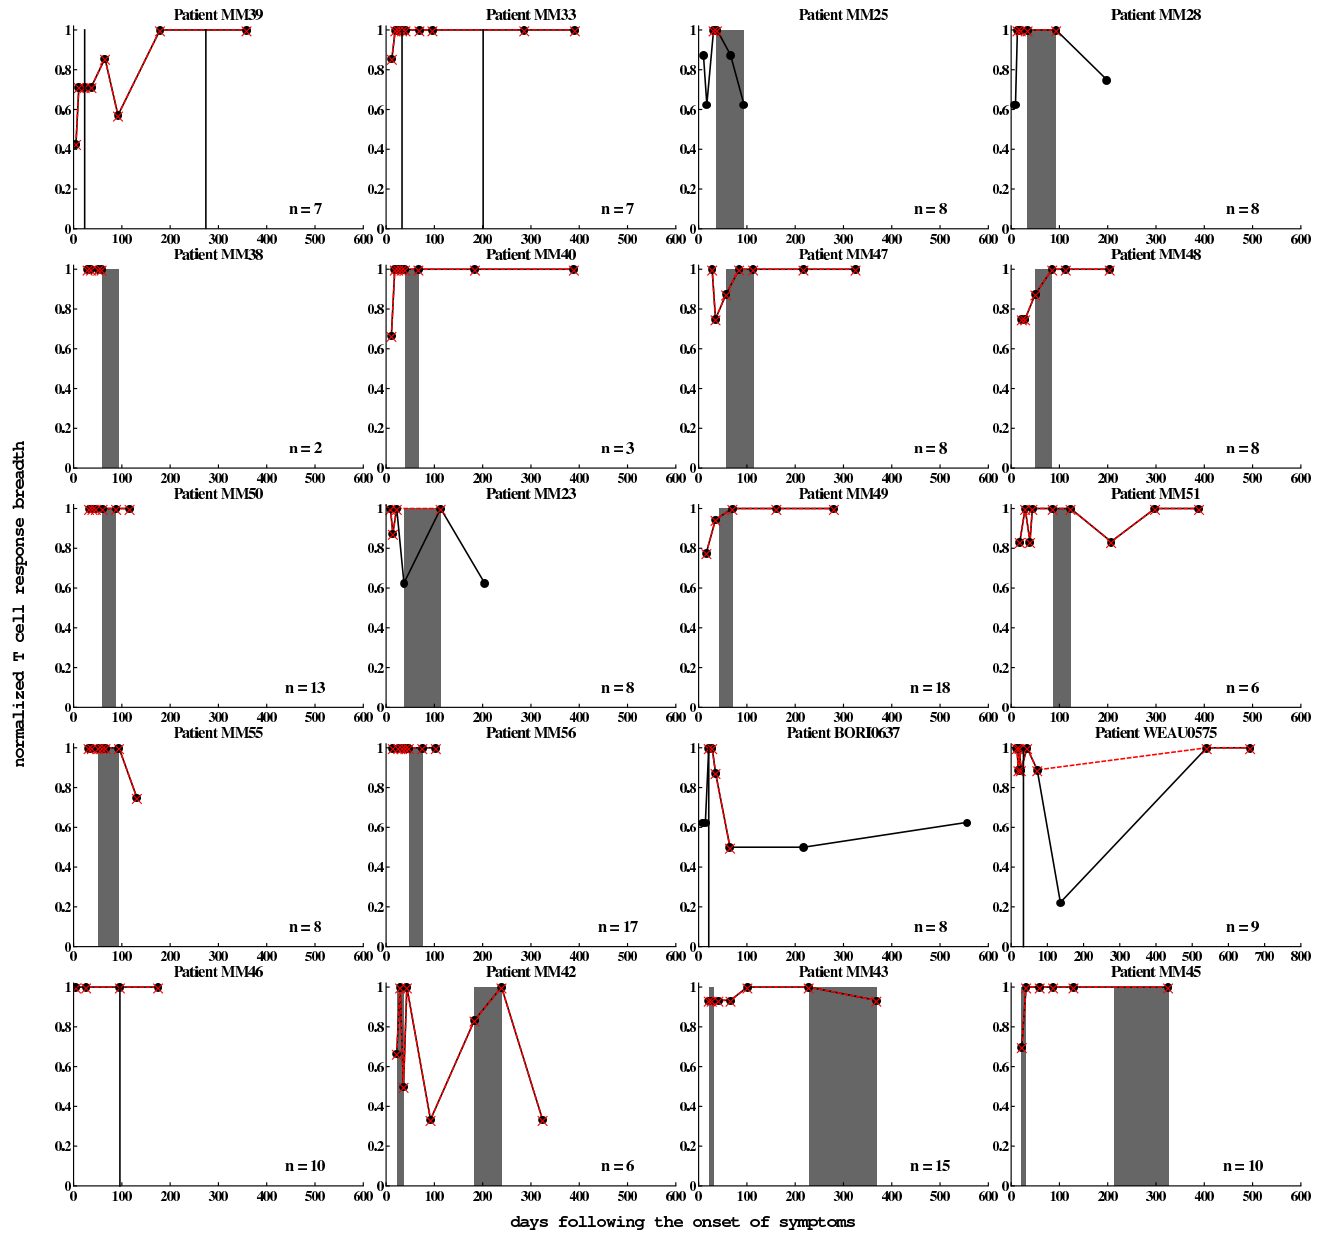

**Figure S7:** Variable dynamics of T-cell response breadth in individual patients. Normalized immune response breadth was defined as the number of responses at a particular time divided by the total number of responses measured in that patient. The shaded bars (or vertical lines) denote times when T-cell response mapping was performed with pooled PBMCs in each patient; in patients MM33 and MM39, mapping was performed twice. Due to missing measurements (“nd”) in some epitope-specific CD8<sup>+</sup> T cell responses, we estimated the breadth at certain time points for a particular patient in two ways: 1) ignoring the time point (red crosshair ×), or 2) replacing the “nd” with 0 (black dot ●) when there was at least one missing measurement at this time point. We found that in some patients (e.g., MM45, MM48, MM49) the breadth expanded slightly to saturation level, and in others, contraction phases followed the saturation (e.g., MM43, MM55). Patient WEAU0575 was followed for 772 days after symptom onset, so the *x*-axis for this patient is longer. Patients SUMA0874 and MM19 were excluded from this plot due to insufficient measurements of all T-cell responses at all time points.

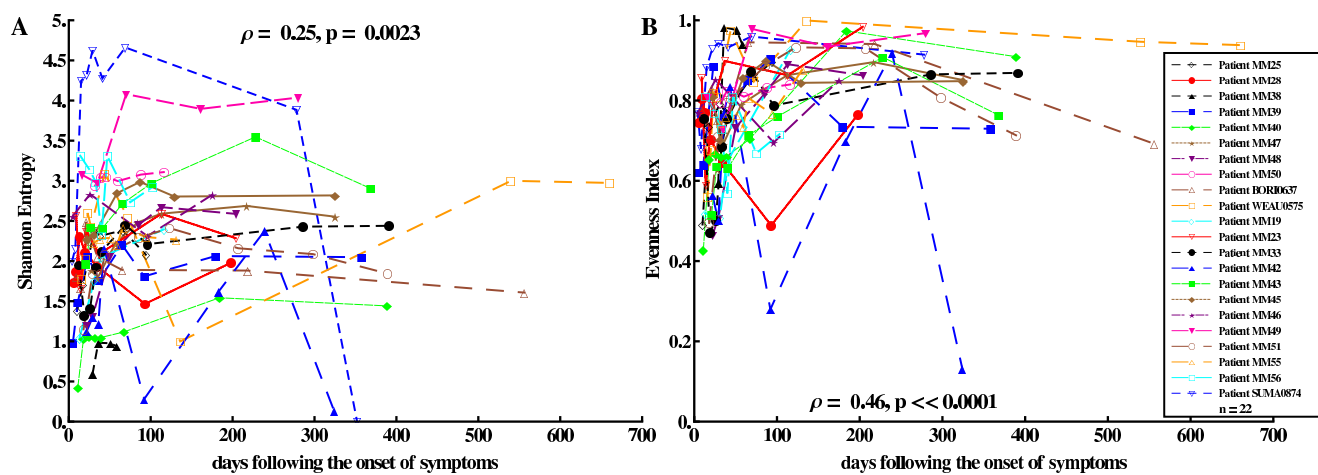

**Figure S8:** *SE* and *EI* of T-cell responses moderately increased over time. *SE* and *EI* were calculated at different time points for all patients (see Material and Methods for more detail); we found a moderate but statistically significant positive trend (Spearman Rank Correlation:  $\rho = 0.30$  ( $p = 0.00074$ )) and  $\rho = 0.49$  ( $p \ll 0.0001$ )). Major significant changes in both measures of breadth occurred within the first 40 days of symptom onset. Analyses included only the time points at which all CD8<sup>+</sup> T-cell responses were measured. Detailed *SE* and *EI* kinetics in each patient are shown in Figs. S9 and S10, respectively.

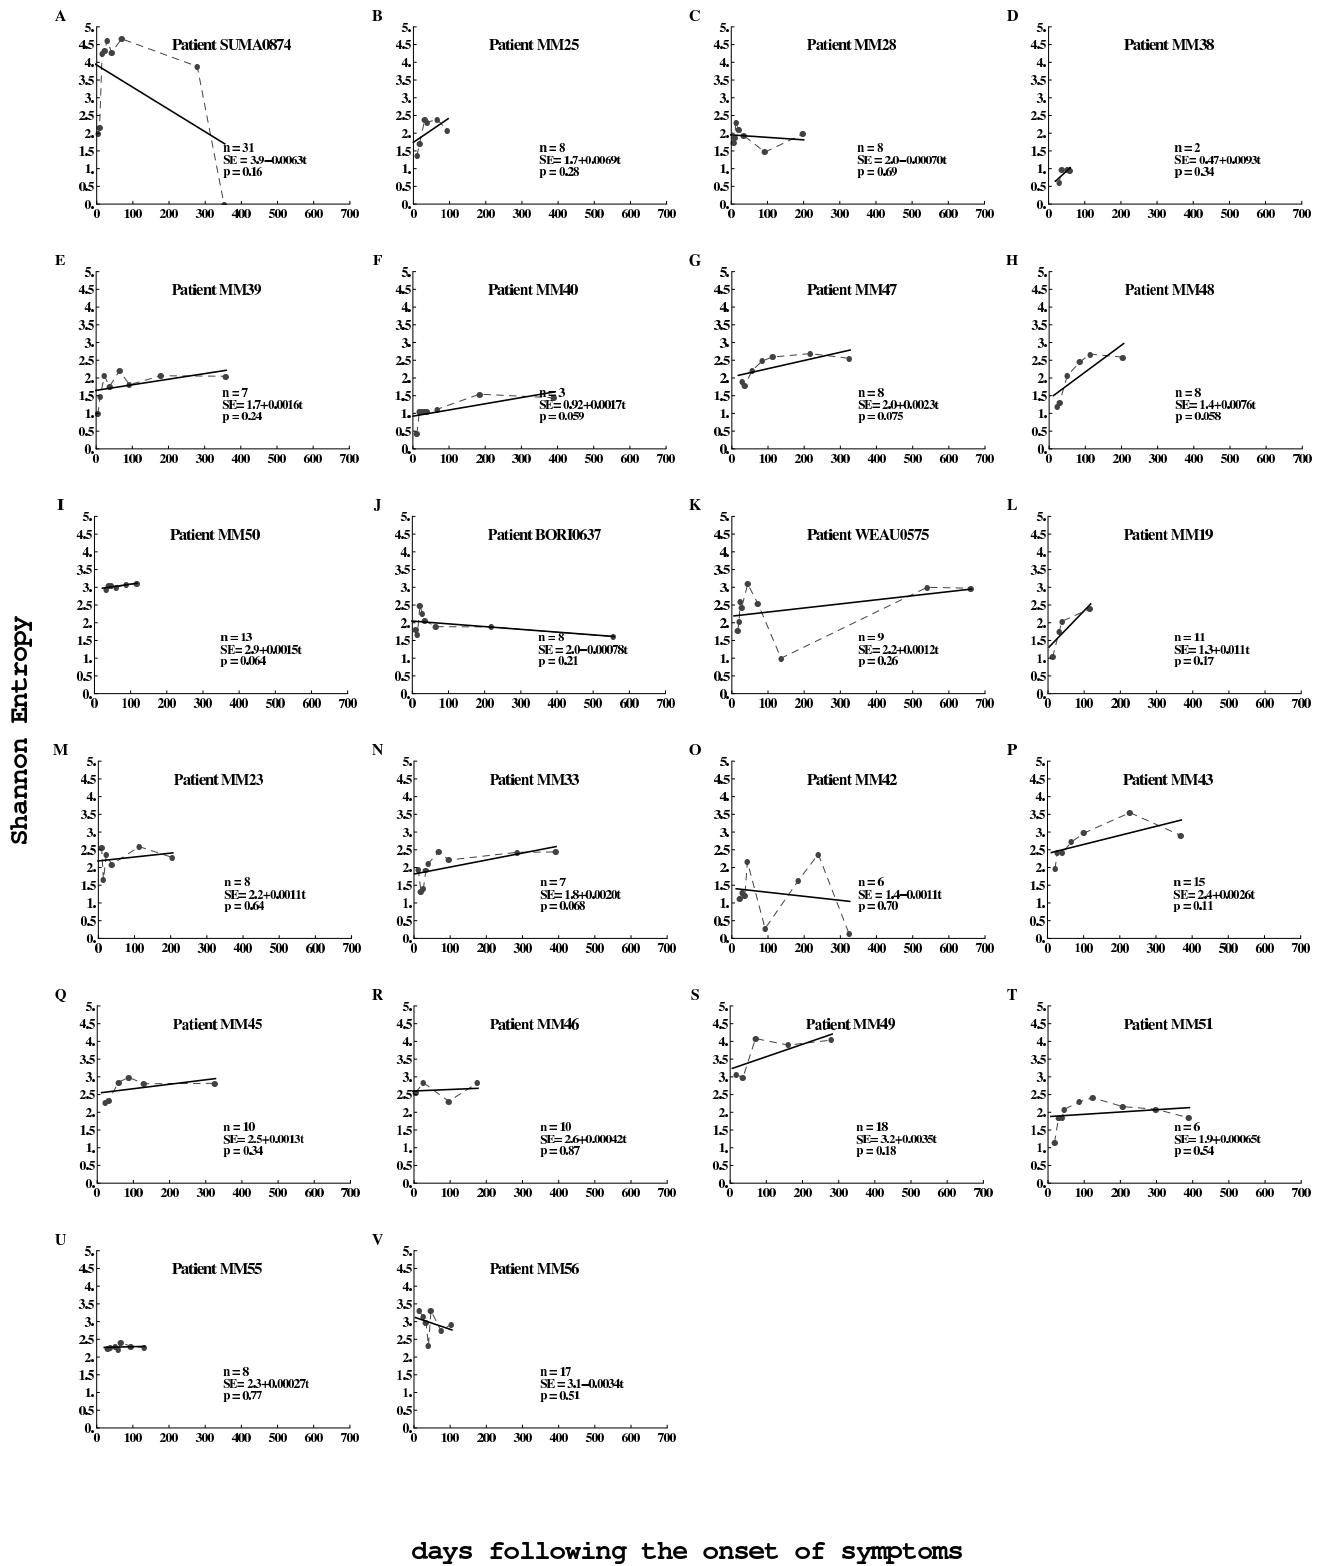

**Figure S9:** Kinetics of *SI* (dashed line) and corresponding linear fitted curve (solid line) for all patients. No trends were statistically significant ( $p$  values from linear regressions are indicated on panels).

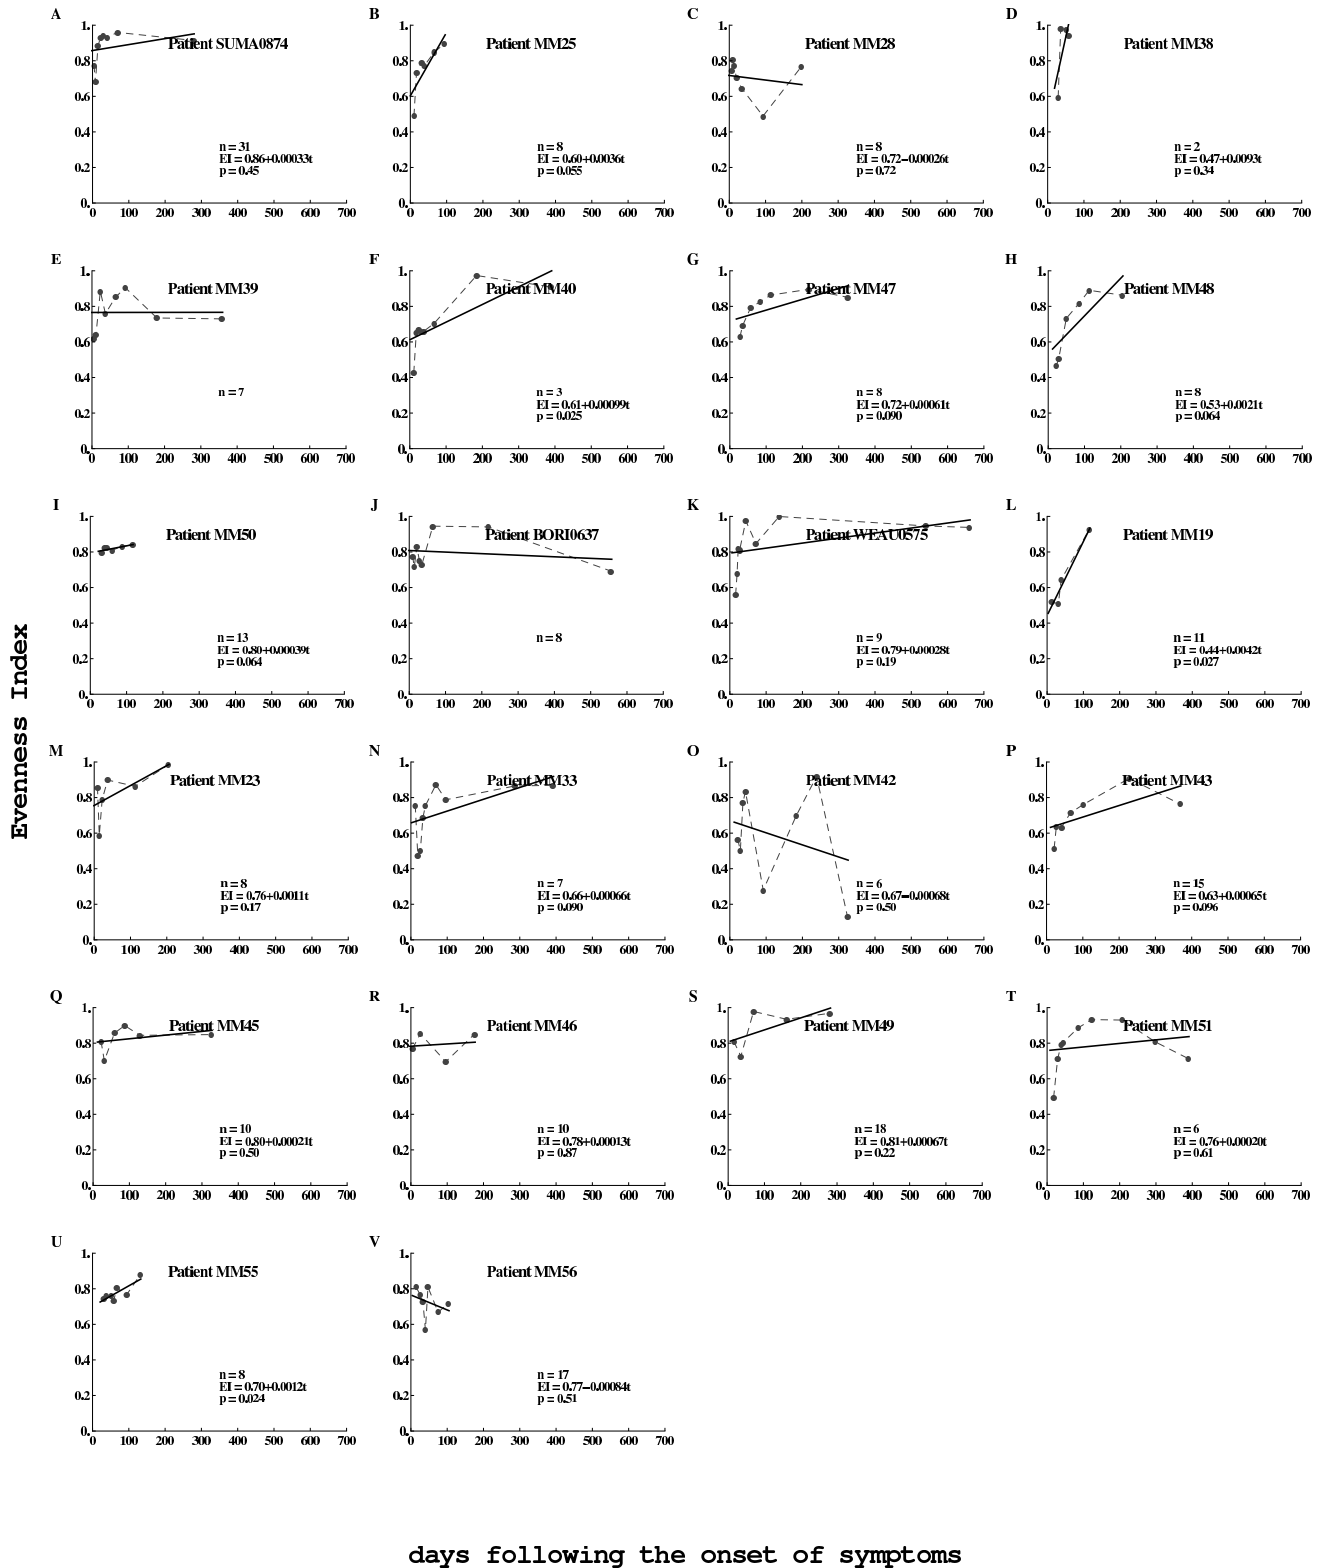

**Figure S10:** Kinetics of *EI* (dashed line) and corresponding linear fitted curve (solid line) for all patients. Two out of 24 patients showed significant increase in *EI* over time while other trends were not significant (*p* values for linear regressions are indicated on the panels).

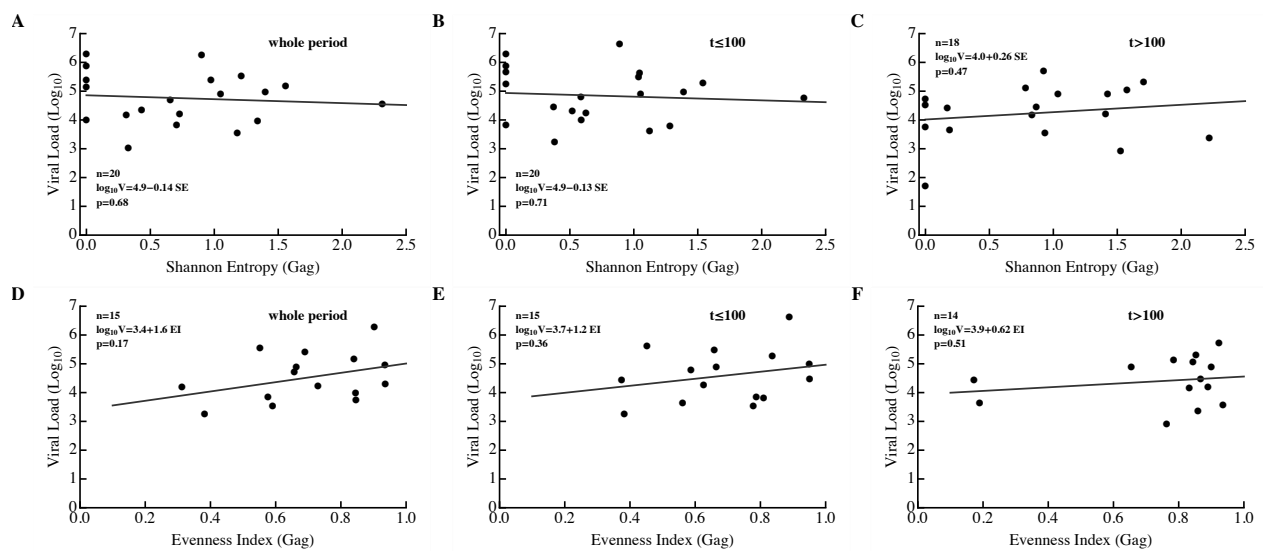

**Figure S11:** Variable correlations between viral load (V) and *SE* (A–C) or *EI* (B–F) of Gag-specific CD8<sup>+</sup> T-cell responses. Note a positive (but nonsignificant) correlation between viral load and breadth measured by *EI*, and positive correlation between breadth measured as *SE* and V for chronic infection ( $t > 100$  days after symptom onset).

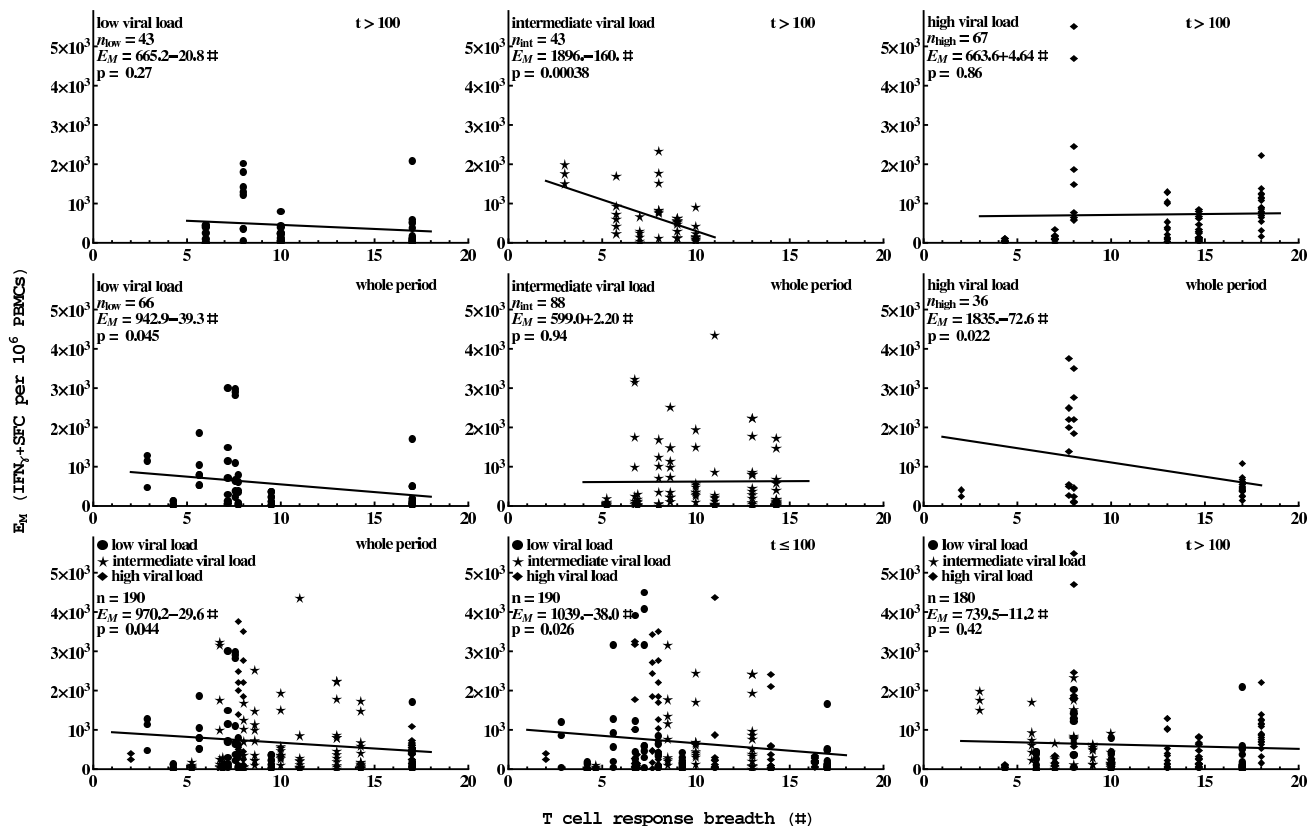

**Figure S12:** Correlation between number of T-cell responses and average size of T-cell response depends on viral load and time period since infection. Correlation between number of immune responses and average size of T-cell response is shown for chronic infection (top row) or for the whole time period (middle row) for different average viral loads. Bottom row shows correlation for all data at different time periods since infection.  $p$  values are from linear regressions; best fit equations are shown on individual panels. Some correlations are negative, indicating the presence of interclonal competition. Low, intermediate, and high viral loads were defined as described in Fig. 9.

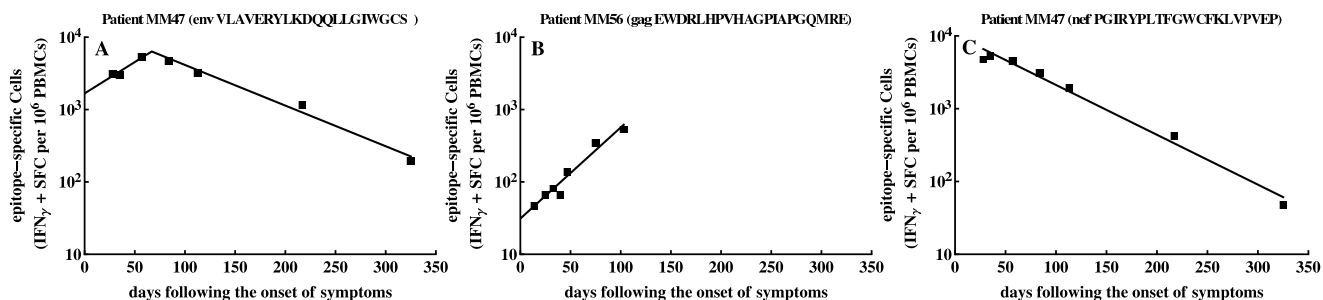

**Figure S13:** Examples of data on the kinetics of epitope-specific CD8<sup>+</sup> T-cell responses and the predicted fits of the basic  $T_{on}$ - $T_{off}$  model eqn. (1) to these data. In all three examples there were no initial zeroes recorded so we set  $T_{on} = 0$  for simplicity.



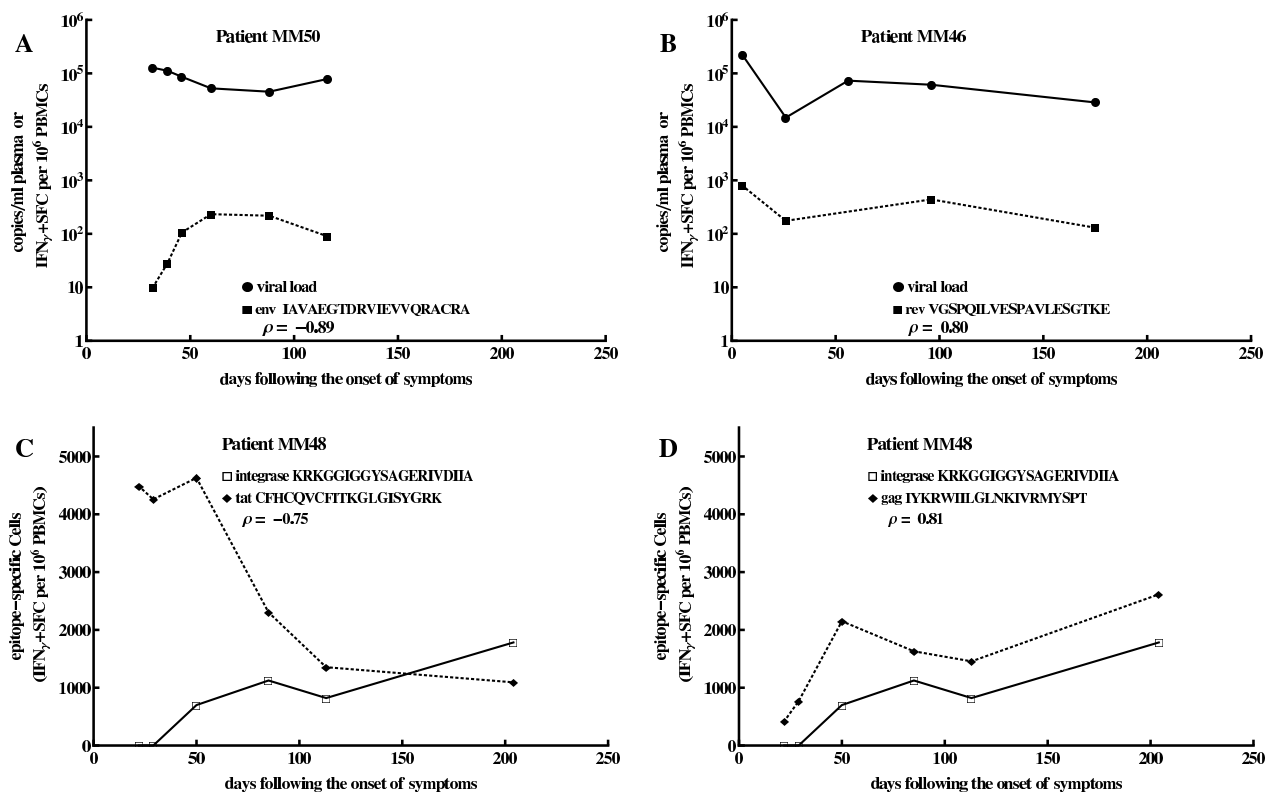

**Figure S14:** Examples of strongly negatively (A&C) and strongly positively (B&D) correlated viral load and epitope-specific CD8<sup>+</sup> T-cell responses or different epitope-specific CD8<sup>+</sup> T-cell responses. The correlation coefficients ( $\rho$ ) were used to generate the histogram in Figures 5 or 8.

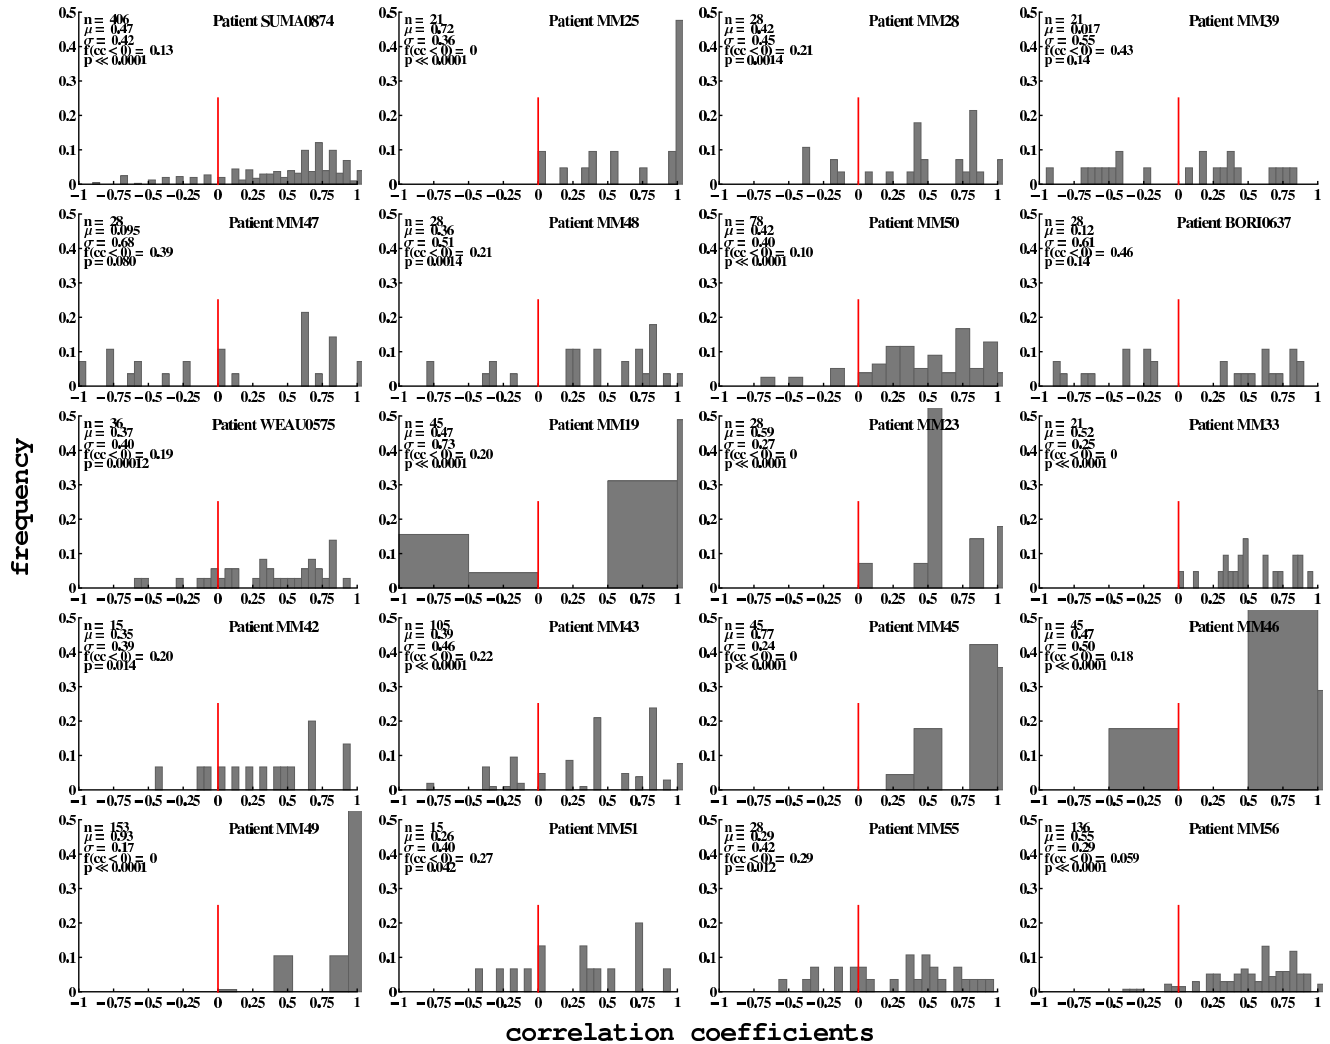

**Figure S15:** Detailed distributions of correlation coefficient ( $cc$ ) between different epitope-specific  $CD8^+$  T-cell responses (IRs) in different patients for  $t \leq 100$  days after symptom onset (acute infection). Negatively correlated epitope-specific  $CD8^+$  T cell responses were observed for nearly all patients, suggesting that interclonal competition between T cell responses specific to different HIV epitopes may occur in all HIV-infected patients.
